# Supplementary material
Source: PubMed Central journal article supplement (PMC3887510)
Supplement: NIHMS541437-supplement-1_si_001.pdf [file NIHMS541437-supplement-1_si_001.pdf]

# Structural Characterization of Native Autoinducing Peptides and Abiotic Analogs Reveals Key Features Essential for Activation and Inhibition of an AgrC Quorum Sensing Receptor in *Staphylococcus aureus*

Yftah Tal-Gan,<sup>1</sup> Monika Ivancic,<sup>1</sup> Gabriel Cornilescu,<sup>2</sup> Claudia C. Cornilescu,<sup>2</sup> and Helen E. Blackwell<sup>1,\*</sup>

<sup>1</sup>Department of Chemistry, University of Wisconsin–Madison, 1101 University Avenue, Madison, WI 53706; <sup>2</sup>National Magnetic Resonance Facility at Madison, University of Wisconsin–Madison, 433 Babcock Drive, Madison, WI 53706

## **Supporting Information.**

|                                                                                         |      |
|-----------------------------------------------------------------------------------------|------|
| Biological assays and data. ....                                                        | S-2  |
| <i>General assay considerations</i> . ....                                              | S-2  |
| <i>AgrC-III antagonism assay protocol and dose response data</i> . ....                 | S-2  |
| <i>AgrC-III agonism assay protocol and dose response data</i> . ....                    | S-4  |
| Tables of NMR chemical shift assignments, numbers of assigned ROEs, and RMSD values.... | S-6  |
| Additional images of calculated peptide structures. ....                                | S-10 |
| BMRB accession numbers. ....                                                            | S-15 |
| NMR spectra. ....                                                                       | S-16 |
| <i>AIP-III</i> . ....                                                                   | S-16 |
| <i>AIP-III D4A</i> . ....                                                               | S-23 |
| <i>tAIP-III</i> . ....                                                                  | S-30 |
| <i>tAIP-III D2A</i> . ....                                                              | S-37 |
| <i>AIP-III D-F5</i> . ....                                                              | S-44 |
| <i>AIP-III D-L7</i> . ....                                                              | S-51 |
| <i>AIP-III F5A</i> . ....                                                               | S-58 |
| <i>AIP-III L7A</i> . ....                                                               | S-65 |
| <i>AIP-I</i> . ....                                                                     | S-72 |
| <i>AIP-II</i> . ....                                                                    | S-79 |
| <i>AIP-IV</i> . ....                                                                    | S-86 |
| References. ....                                                                        | S-93 |

## **Biological assays and data.**

### *General assay considerations.*

Bacterial cultures were grown in a standard laboratory incubator at 37 °C with shaking (200 rpm) unless noted otherwise. Brain heart infusion (BHI) was prepared as instructed with pH = 7.35. Fluorescence and absorbance measurements were obtained using a Biotek Synergy 2 microplate reader using Gen5 data analysis software. Biological assays were performed in triplicate. IC<sub>50</sub> and EC<sub>50</sub> values were calculated using GraphPad Prism software (v. 4.0) using a sigmoidal curve fit.

Stock solutions of peptides (1 mM) were prepared in DMSO and stored at 4 °C in sealed vials. The amount of DMSO used in biological assays did not exceed 4% (v/v). Black or clear polystyrene 96-well microtiter plates (Costar) were used for bacteriological assays.

### *AgrC-III antagonism assay protocol and dose response data.*

Antagonism of AgrC-III by the non-native peptides was measured in a fluorescence-based assay using the *S. aureus* reporter strain AH1747 as previously described.<sup>1</sup> This assay allows for the quantification of AgrC-III antagonism by measuring GFP fluorescence. Serial dilutions of peptide stock solutions were performed to obtain dose response antagonism data, and IC<sub>50</sub> values were calculated. Dose response curves and IC<sub>50</sub> values for peptides tAIP-III, AIP-III D-F5, AIP-III D-L6, AIP-III F5A, and AIP-III L6A are shown in Figure S-1. Each dose response experiment was performed in triplicate on three separate occasions (*i.e.*, experiments #1–3; shown for each peptide in Figure S-1).

The IC<sub>50</sub> values for AIP-III D4A, tAIP-III D2A, AIP-I, AIP-II, and AIP-IV reported in Table 1 in the main text are from our previous study using the assay protocol above.<sup>1</sup> This past study also revealed AIP-III D-L7 to be inactive in the antagonism assay and was actually an AgrC-III agonist instead (see below). The IC<sub>50</sub> values for tAIP-III, AIP-III D-F5, AIP-III D-L6, AIP-III F5A, AIP-III L6A, and AIP-III L7A were not calculated in our previous study because they displayed limited activity (less than ~50% inhibition) at 200 nM in primary assays, and thus their IC<sub>50</sub> values were estimated as >200 nM.<sup>1</sup> We performed antagonism dose response analyses on these peptides for the current study to provide a more quantitative analysis of their activities, and found that (except for one compound) their IC<sub>50</sub> values ranged from ~100–400 nM (Table 1). The IC<sub>50</sub> value for AIP-III L7A was not calculated as this analog failed to show appreciable antagonistic activity at 1000 nM (IC<sub>50</sub> value reported as >1000 nM in Table 1).

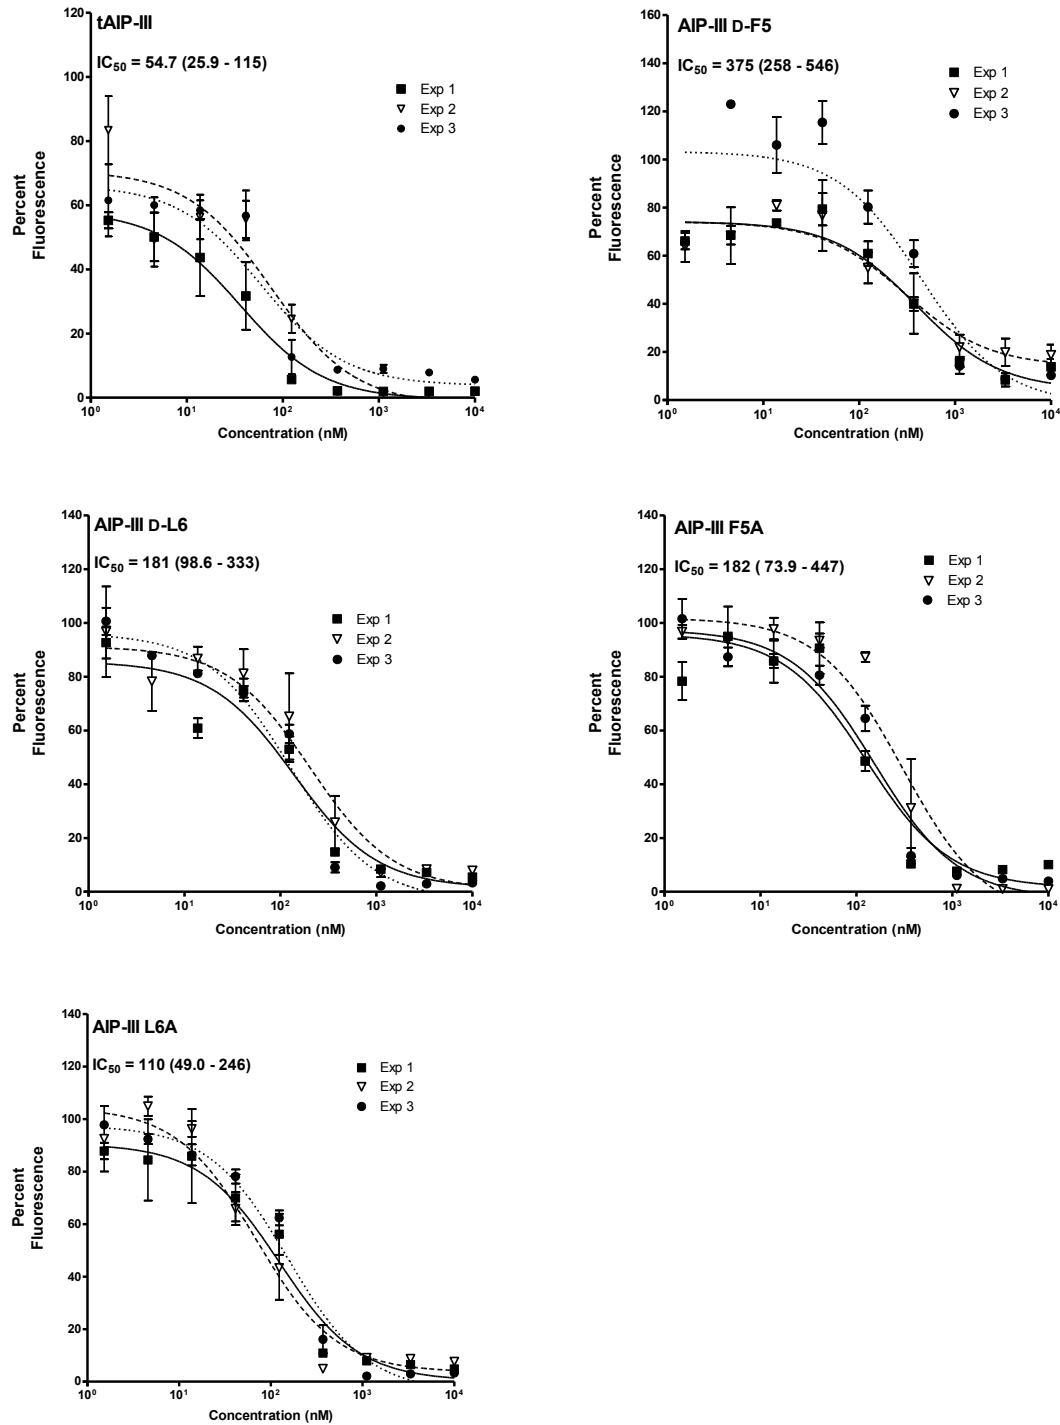

**Figure S-1.** AgrC-III antagonism dose response curves for tAIP-III, AIP-III D-F5, AIP-III D-L6, AIP-III F5A, and AIP-III L6A. Peptides were screened over varying concentrations in the *S. aureus* AgrC-III gfp-reporter strain AH1747. Error bars indicate standard error of the mean of triplicate values. Range in parentheses after IC<sub>50</sub> value (in nM) indicates 95% confidence interval (CI) of triplicate experiments.

*AgrC-III agonism assay protocol and dose response data.*

Agonism of AgrC-III by AIP-III and non-native peptides was measured by monitoring  $\beta$ -lactamase activity using the *S. aureus* reporter strain RN9532. Our  $\beta$ -lactamase/nitrocefin assay protocol was analogous to that of Novick and co-workers,<sup>2</sup> except that we monitored  $\beta$ -lactamase activity at a single time point (at 20 min) as opposed to determining a rate profile for enzyme activity (the single time point reading gave analogous data trends). In brief, peptide stock solutions were diluted with DMSO in serial dilutions, and 2  $\mu$ L aliquots of the diluted solutions were added to each of the wells of a clear 96-well microtiter plate. An overnight culture of *S. aureus* RN9532 was diluted 1:50 with fresh BHI (pH 7.35), and the bacteria were incubated until reaching early exponential phase ( $OD_{600} = 0.16$ ). A 50- $\mu$ L portion of culture was added to each well of the microtiter plate containing peptide. Plates were incubated for 1 h. The  $OD_{600}$  of each well was recorded using a plate reader, followed by the addition of sodium azide (5  $\mu$ L of a 50 mM solution) and nitrocefin solution (the  $\beta$ -lactamase substrate; 50  $\mu$ L of a 132  $\mu$ g/mL solution in 0.1 M sodium phosphate buffer, pH 5.8). The plate was incubated in the dark for 20 min, the absorbance (at 495 nm) of each well was recorded, and  $EC_{50}$  values were calculated.

The *S. aureus* RN9532 strain was previously used by Novick, Muir, and co-workers to determine an  $EC_{50}$  value of 26 nM for AIP-III for AgrC-III activation.<sup>3</sup> In our hands, we were unable to reproduce this  $EC_{50}$  value, and obtained an  $EC_{50}$  value for AIP-III that was 20-times higher (406 nM). We were able to reproduce their  $EC_{50}$  values for AIP-I, -II, and -IV using the related *S. aureus*  $\beta$ -lactamase reporter strains that report AgrC-I, -II, and -IV activity, respectively (data not shown).<sup>3</sup> Nevertheless, we used the RN9532 reporter strain to examine the ability of the AIP-III analogs and the native AIPs-I, -II, and -IV to activate AgrC-III relative to AIP-III. None of the AIP-III analogs with AgrC-III antagonistic activities (in the *S. aureus* reporter strain AH1747; see above) were capable of agonizing AgrC-III in the RN9532 reporter strain. The native AIPs-I, -II, and -IV were also incapable of AgrC-III activation, corroborating previous findings by Novick, Muir, and co-workers using the same strain.<sup>3</sup> However, as expected, AIP-III D-L7 was found to be an agonist of AgrC-III, with an  $EC_{50}$  value comparable (within error) to AIP-III (286 nM). Dose response curves and  $EC_{50}$  values for AIP-III and AIP-III D-L7 are shown in Figure S-2. Each dose response experiment was performed in triplicate on three separate occasions (*i.e.*, experiments #1–3; shown for each peptide in Figure S-2).



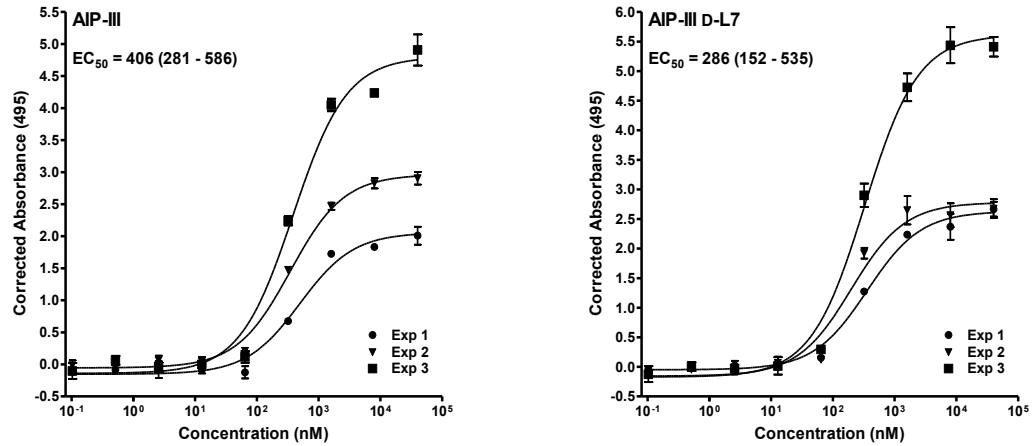

**Figure S-2.** AgrC-III agonism dose response curves for AIP-III (left) and AIP-III D-L7 (right). Peptides were screened over varying concentrations in the *S. aureus* AgrC-III  $\beta$ -lactamase-reporter strain RN9532. Error bars indicate standard error of the mean of triplicate values. Range in parentheses after EC<sub>50</sub> value (in nM) indicates 95% confidence interval (CI) of triplicate experiments.

**Tables of NMR chemical shift assignments, numbers of assigned ROEs, and RMSD values.**

**Table S-1.** Chemical shift assignments for AIP-III

| Residue | HN (ppm) | H $\alpha$ (ppm) | H $\beta$ (ppm) | Others (ppm)                           |
|---------|----------|------------------|-----------------|----------------------------------------|
| Ile1    |          | 3.75             | 1.85            | H $\gamma$ 1.40, 0.89; H $\delta$ 0.84 |
| Asn2    | 8.47     | 4.62             | 2.66, 2.58      |                                        |
| Cys3    | 8.16     | 4.37             | 3.20, 2.79      |                                        |
| Asp4    | 8.22     | 4.49             | 2.55, 2.52      |                                        |
| Phe5    | 8.14     | 4.32             | 3.12            | H $\delta$ 7.18; H $\epsilon$ 7.28     |
| Leu6    | 7.85     | 4.14             | 1.65, 1.54      | H $\gamma$ 1.16; H $\delta$ 0.77, 0.69 |
| Leu7    | 8.16     | 4.49             | 1.67            | H $\gamma$ 1.56                        |

**Table S-2.** Chemical shift assignments for AIP-III D4A

| Residue | HN (ppm) | H $\alpha$ (ppm) | H $\beta$ (ppm) | Others (ppm)                                 |
|---------|----------|------------------|-----------------|----------------------------------------------|
| Ile1    |          | 3.74             | 1.84            | H $\gamma$ 1.39, 1.09, 0.89; H $\delta$ 0.83 |
| Asn2    | 8.47     | 4.62             | 2.67, 2.57      | H $\delta$ 7.37, 6.70                        |
| Cys3    | 8.13     | 4.33             | 3.19, 2.80      |                                              |
| Ala4    | 8.14     | 4.10             | 1.13            |                                              |
| Phe5    | 8.04     | 4.33             | 3.12, 3.06      | H $\delta$ 7.18; H $\epsilon$ 7.27           |
| Leu6    | 7.86     | 4.13             | 1.67, 1.51      | H $\gamma$ 1.21; H $\delta$ 0.77, 0.70       |
| Leu7    | 8.22     | 4.51             | 1.71, 1.66      | H $\gamma$ 1.55; H $\delta$ 0.88, 0.78       |

**Table S-3.** Chemical shift assignments for tAIP-III

| Residue | HN (ppm) | H $\alpha$ (ppm) | H $\beta$ (ppm) | Others (ppm)                           |
|---------|----------|------------------|-----------------|----------------------------------------|
| Ac0     |          | 1.85             |                 |                                        |
| Cys1    | 8.08     | 4.29             | 3.19, 2.76      |                                        |
| Asp2    | 8.17     | 4.46             | 2.56, 2.50      |                                        |
| Phe3    | 8.15     | 4.28             | 3.10            | H $\delta$ 7.16; H $\epsilon$ 7.29     |
| Leu4    | 7.83     | 4.10             | 1.64, 1.48      | H $\gamma$ 1.15; H $\delta$ 0.75, 0.66 |
| Leu5    | 8.12     | 4.46             | 1.71, 1.64      | H $\gamma$ 1.55; H $\delta$ 0.86, 0.75 |

**Table S-4.** Chemical shift assignments for tAIP-III D2A

| Residue | HN (ppm) | H $\alpha$ (ppm) | H $\beta$ (ppm) | Others (ppm)                           |
|---------|----------|------------------|-----------------|----------------------------------------|
| Ac0     |          | 1.87             |                 |                                        |
| Cys1    | 8.08     | 4.32             | 3.19, 2.79      |                                        |
| Ala2    | 8.12     | 4.11             | 1.14            |                                        |
| Phe3    | 8.05     | 4.33             | 3.12, 3.06      | H $\delta$ 7.18; H $\epsilon$ 7.27     |
| Leu4    | 7.86     | 4.13             | 1.67, 1.50      | H $\gamma$ 1.21; H $\delta$ 0.78, 0.70 |
| Leu5    | 8.21     | 4.52             | 1.72, 1.66      | H $\gamma$ 1.56; H $\delta$ 0.88, 0.78 |

**Table S-5.** Chemical shift assignments for AIP-III D-F5

| Residue | HN (ppm) | H $\alpha$ (ppm) | H $\beta$ (ppm) | Others (ppm)                                     |
|---------|----------|------------------|-----------------|--------------------------------------------------|
| Ile1    |          | 3.76             | 1.86            | H $\gamma$ 1.41, 1.11, 0.89; H $\delta$ 0.84     |
| Asn2    | 8.51     | 4.64             | 2.68, 2.59      |                                                  |
| Cys3    | 8.17     | 4.34             | 3.19, 2.71      |                                                  |
| Asp4    | 8.29     | 4.77             | 2.78, 2.61      |                                                  |
| D-Phe5  | 8.56     | 4.36             | 3.03, 2.88      | H $\delta$ 7.16; H $\epsilon$ 7.27; $\zeta$ 7.23 |
| Leu6    | 7.80     | 4.49             | 1.65            | H $\gamma$ 1.46; H $\delta$ 0.83, 0.71           |
| Leu7    | 8.08     | 3.93             | 1.26            | H $\delta$ 0.61, 0.50                            |

**Table S-6.** Chemical shift assignments for AIP-III D-L7

| Residue | HN (ppm) | H $\alpha$ (ppm) | H $\beta$ (ppm) | Others (ppm)                                 |
|---------|----------|------------------|-----------------|----------------------------------------------|
| Ile1    |          | 3.75             | 1.85            | H $\gamma$ 1.40, 1.11, 0.89; H $\delta$ 0.83 |
| Asn2    | 8.48     | 4.62             | 2.66, 2.58      | H $\delta$ 7.38                              |
| Cys3    | 8.25     | 4.32             | 3.11, 2.95      |                                              |
| Asp4    | 8.43     | 4.45             | 2.57            |                                              |
| Phe5    | 7.92     | 4.35             | 3.05            | H $\delta$ 7.18; H $\epsilon$ 7.27           |
| Leu6    | 7.99     | 4.31             | 1.47            | H $\gamma$ 1.19; H $\delta$ 0.80, 0.75       |
| D-Leu7  | 8.65     | 4.35             | 1.54            | H $\gamma$ 1.48; H $\delta$ 0.82, 0.75       |

**Table S-7.** Chemical shift assignments for AIP-III F5A

| Residue | HN (ppm) | H $\alpha$ (ppm) | H $\beta$ (ppm) | Others (ppm)                                 |
|---------|----------|------------------|-----------------|----------------------------------------------|
| Ile1    |          | 3.74             | 1.85            | H $\gamma$ 1.39, 1.12, 0.89; H $\delta$ 0.84 |
| Asn2    | 8.49     | 4.62             | 2.70, 2.59      |                                              |
| Cys3    | 8.18     | 4.38             | 3.21, 2.79      |                                              |
| Asp4    | 8.24     | 4.57             | 2.71, 2.63      |                                              |
| Ala5    | 8.25     | 4.03             | 1.37            |                                              |
| Leu6    | 7.81     | 4.23             | 1.70            | H $\gamma$ 1.56; H $\delta$ 0.85, 0.80       |
| Leu7    | 8.04     | 4.52             | 1.69, 1.63      | H $\gamma$ 1.53; H $\delta$ 0.86, 0.76       |

**Table S-8.** Chemical shift assignments for AIP-III L7A

| Residue | HN (ppm) | H $\alpha$ (ppm) | H $\beta$ (ppm) | Others (ppm)                                 |
|---------|----------|------------------|-----------------|----------------------------------------------|
| Ile1    |          | 3.74             | 1.84            | H $\gamma$ 1.39, 1.11, 0.88; H $\delta$ 0.83 |
| Asn2    | 8.49     | 4.61             | 2.66, 2.57      | H $\delta$ 7.37, 6.69                        |
| Cys3    | 8.17     | 4.39             | 3.20, 2.77      |                                              |
| Asp4    | 8.28     | 4.50             | 2.56, 2.51      |                                              |
| Phe5    | 8.26     | 4.28             | 3.12            | H $\delta$ 7.17; H $\epsilon$ 7.28           |
| Leu6    | 7.86     | 4.18             | 1.64, 1.50      | H $\gamma$ 1.17; H $\delta$ 0.76, 0.68       |
| Ala7    | 8.19     | 4.51             | 1.34            |                                              |

**Table S-9.** Chemical shift assignments for AIP-I

| Residue | HN (ppm) | H $\alpha$ (ppm) | H $\beta$ (ppm) | Others (ppm)                           |
|---------|----------|------------------|-----------------|----------------------------------------|
| Tyr1    |          | 4.17             | 3.10, 3.01      | H $\delta$ 7.08; H $\epsilon$ 6.77     |
| Ser2    | 8.31     | 4.51             | 3.76            |                                        |
| Thr3    | 7.96     | 4.26             | 4.18            | H $\gamma$ 1.09                        |
| Cys4    | 8.18     | 4.44             | 3.25, 2.93      |                                        |
| Asp5    | 8.34     | 4.53             | 2.59            |                                        |
| Phe6    | 8.01     | 4.48             | 3.14            | H $\delta$ 7.23; H $\epsilon$ 7.31     |
| Ile7    | 7.71     | 3.96             | 1.93            | H $\gamma$ 1.15, 0.88; H $\delta$ 0.74 |
| Met8    | 8.57     | 4.54             | 2.21, 2.03      | H $\gamma$ 2.58, 2.44                  |

**Table S-10.** Chemical shift assignments for AIP-II

| Residue | HN (ppm) | H $\alpha$ (ppm) | H $\beta$ (ppm) | Others (ppm)                           |
|---------|----------|------------------|-----------------|----------------------------------------|
| Gly1    |          | 3.75             |                 |                                        |
| Val2    | 8.24     | 4.07             | 1.99            | H $\gamma$ 0.83                        |
| Asn3    | 8.25     | 4.58             | 2.72, 2.62      | H $\delta$ 7.38, 6.70                  |
| Ala4    | 8.02     | 4.19             | 1.26            |                                        |
| Cys5    | 8.14     | 4.41             | 3.28, 2.95      |                                        |
| Ser6    | 8.25     | 4.32             | 3.74            |                                        |
| Ser7    | 8.02     | 4.20             | 3.84            |                                        |
| Leu8    | 7.81     | 3.99             | 1.16, 1.01      | H $\gamma$ 1.25; H $\delta$ 0.71, 0.65 |
| Phe9    | 8.22     | 4.78             | 3.40, 2.76      | H $\delta$ 7.17; H $\epsilon$ 7.25     |

**Table S-11.** Chemical shift assignments for AIP-IV

| Residue | HN (ppm) | H $\alpha$ (ppm) | H $\beta$ (ppm) | Others (ppm)                           |
|---------|----------|------------------|-----------------|----------------------------------------|
| Tyr1    |          | 4.12             | 3.07, 2.97      | H $\delta$ 7.04; H $\epsilon$ 6.73     |
| Ser2    | 8.26     | 4.42             | 3.70            |                                        |
| Thr3    | 7.89     | 4.10             | 3.98            | H $\gamma$ 0.94                        |
| Cys4    | 8.08     | 4.33             | 3.18, 2.81      |                                        |
| Tyr5    | 8.05     | 4.30             | 2.70            | H $\delta$ 6.93; H $\epsilon$ 6.67     |
| Phe6    | 8.04     | 4.32             | 3.09, 2.97      | H $\delta$ 7.15; H $\epsilon$ 7.27     |
| Ile7    | 7.55     | 3.94             | 1.92            | H $\gamma$ 1.09, 0.83; H $\delta$ 0.67 |
| Met8    | 8.53     | 4.51             | 2.24, 2.01      | H $\gamma$ 2.56, 2.44                  |

**Table S-12.** Number of assigned ROEs and RMSD values for each peptide

| Peptide name   | Total ROEs | Intra-residue ROEs | Inter-residue ROEs |                |       | Backbone RMSD (Å) <sup>a</sup> | Heavy atom RMSD (Å) <sup>a</sup> |
|----------------|------------|--------------------|--------------------|----------------|-------|--------------------------------|----------------------------------|
|                |            |                    | <i>i - i+1</i>     | <i>i - i+2</i> | other |                                |                                  |
| AIP-I          | 99         | 52                 | 41                 | 5              | 1     | 0.35                           | 0.88                             |
| AIP-II         | 83         | 57                 | 25                 | 1              | 0     | 1.25                           | 1.81                             |
| AIP-III        | 60         | 42                 | 14                 | 3              | 1     | 0.42                           | 0.96                             |
| AIP-IV (total) | 100        | 58                 | 31                 | 8              | 3     | 1.01                           | 1.91                             |
| AIP-IV (con A) |            |                    |                    |                |       | 0.50 <sup>b</sup>              | 1.12 <sup>b</sup>                |
| AIP-IV (con B) |            |                    |                    |                |       | 0.58 <sup>c</sup>              | 1.12 <sup>c</sup>                |
| AIP-III D4A    | 98         | 71                 | 21                 | 4              | 2     | 0.49                           | 0.93                             |
| tAIP-III       | 62         | 49                 | 12                 | 1              | 0     | 0.49                           | 1.13                             |
| tAIP-III D2A   | 63         | 49                 | 13                 | 1              | 0     | 0.38                           | 0.94                             |
| AIP-III D-F5   | 83         | 57                 | 16                 | 9              | 1     | 0.39                           | 0.89                             |
| AIP-III D-L7   | 77         | 53                 | 22                 | 0              | 2     | 0.40                           | 0.99                             |
| AIP-III F5A    | 58         | 49                 | 9                  | 0              | 0     | 0.50                           | 1.18                             |
| AIP-III L7A    | 99         | 60                 | 32                 | 3              | 4     | 0.28                           | 0.66                             |

<sup>a</sup>RMSD values calculated for the 20-structure ensemble of each peptide, if not indicated otherwise. <sup>b</sup>RMSD value calculated for the conformation A 12-structure ensemble of AIP-IV. <sup>c</sup>RMSD value calculated for the conformation B 8-structure ensemble of AIP-IV.

Additional images of calculated peptide structures.

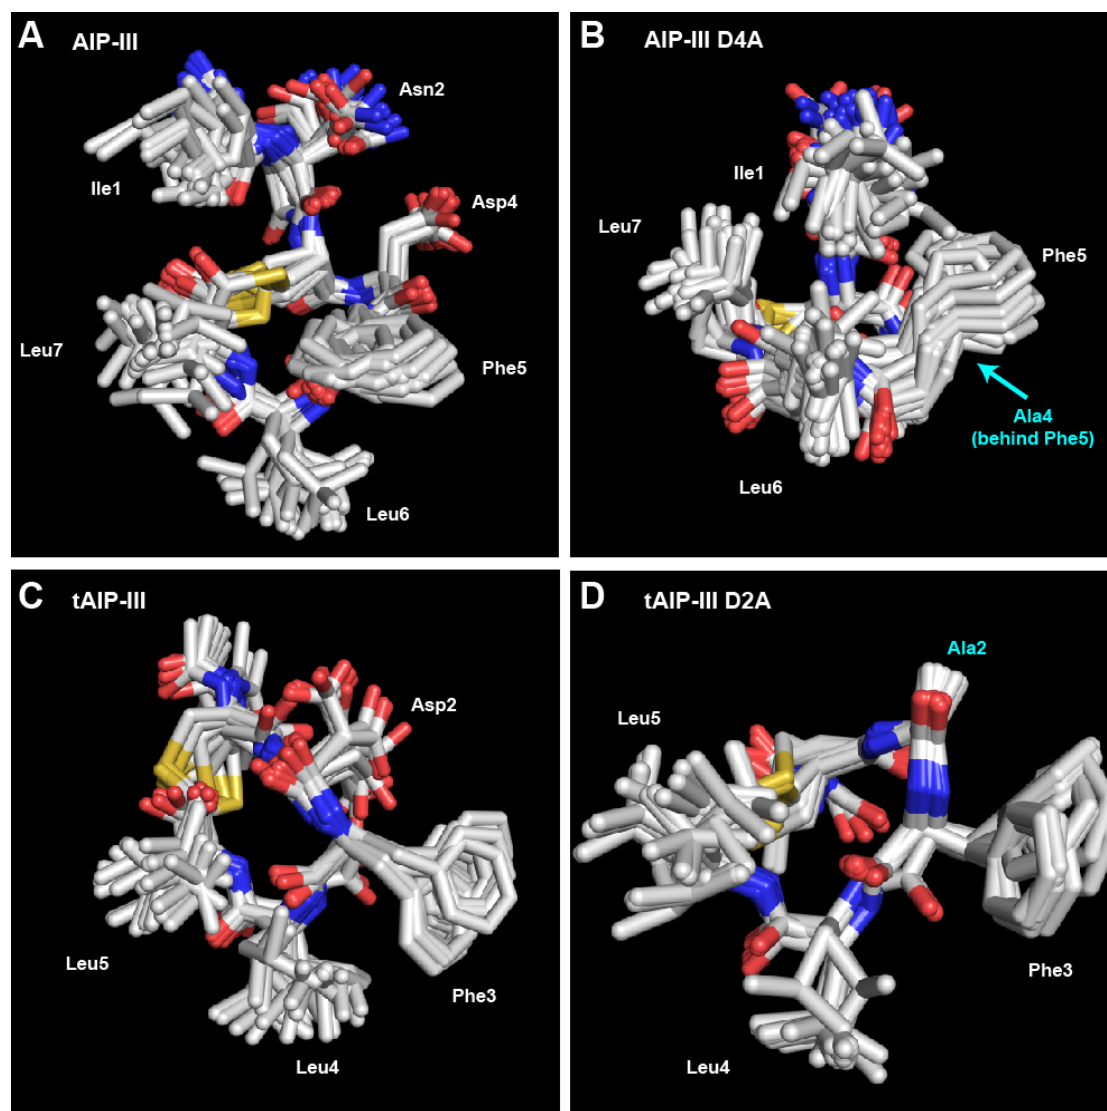

**Figure S-3.** Images of the heavy atom 20-structure ensembles for A) AIP-III; B) AIP-III D4A; C) tAIP-III; and D) tAIP-III D2A. For all structures, carbon is silver, oxygen is red, nitrogen is blue, and sulfur is yellow. Residue labeled in cyan is the altered residue in each analog.

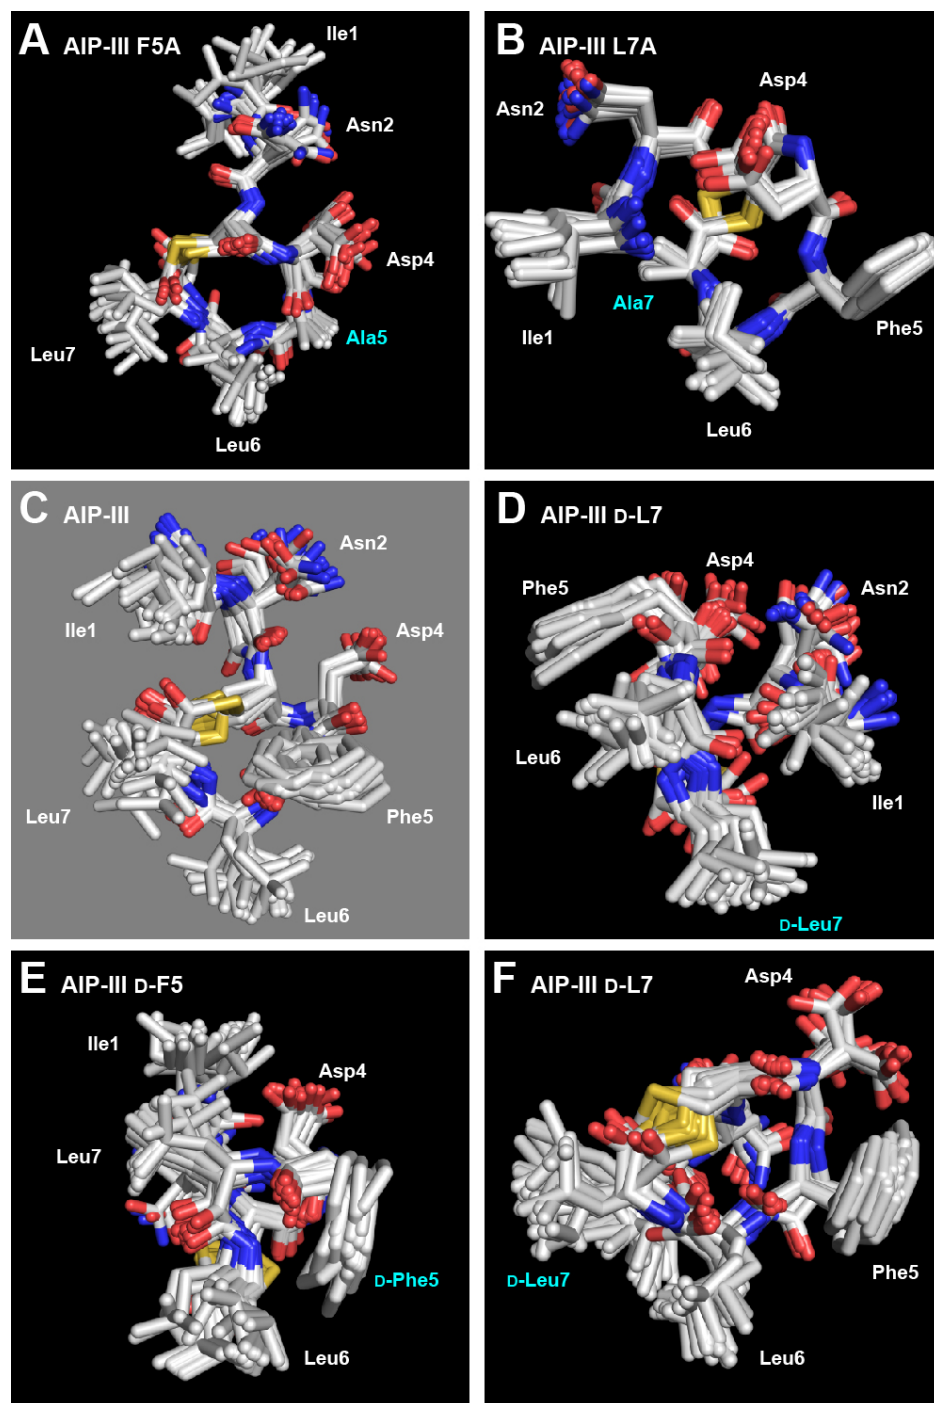

**Figure S-4.** Images of the heavy atom 20-structure ensembles for A) AIP-III F5A; B) AIP-III L7A; C) native AIP-III (included for comparison); D) AIP-III D-L7 (from an angle that shows the alternate triangular knob and activation anchor; see main text); E) AIP-III D-F5; and F) AIP-III D-L7 (from the same angle as the other analogs). For all structures, carbon is silver, oxygen is red, nitrogen is blue, and sulfur is yellow. Residue labeled in cyan is the altered residue in each analog.

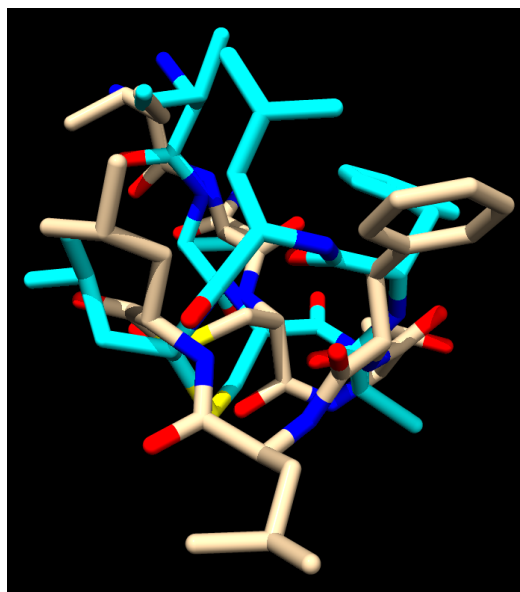

**Figure S-5.** Overlay of the heavy atom lowest energy structures for AIP-III D4A (cyan) and AIP-III (tan).

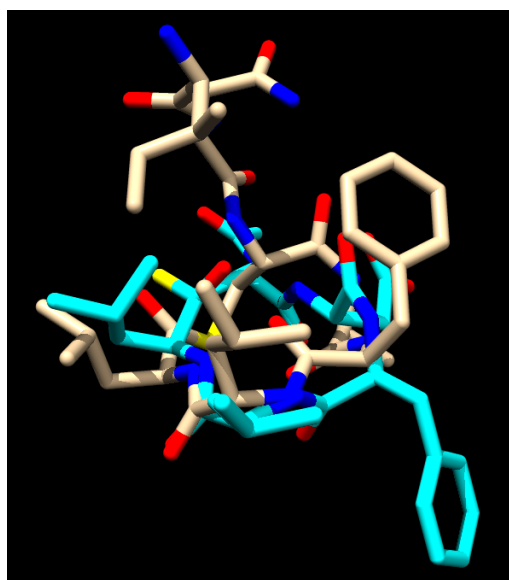

**Figure S-6.** Overlay of the heavy atom lowest energy structures for tAIP-III (cyan) and AIP-III D4A (tan).



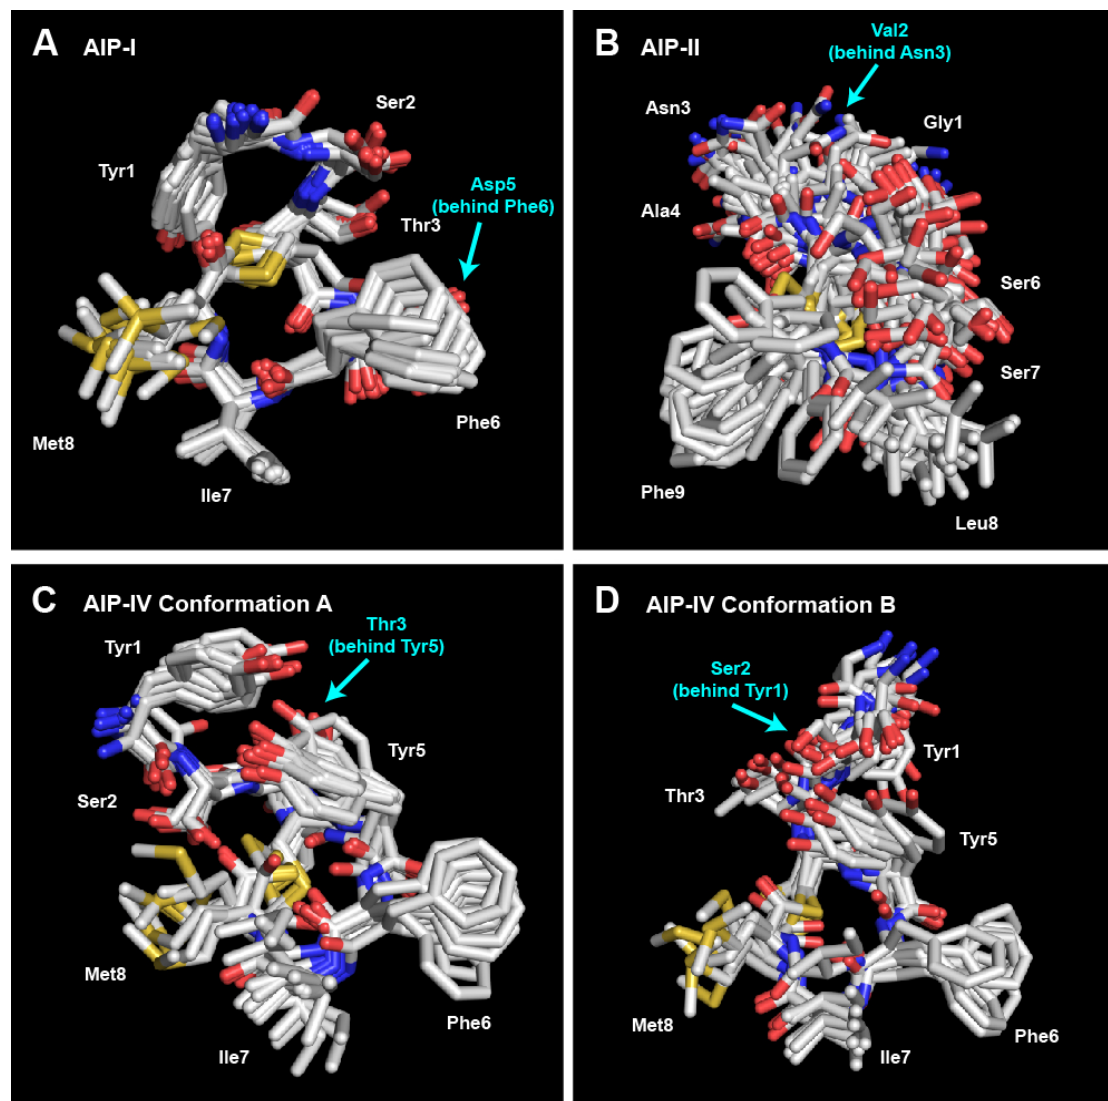

**Figure S-7.** Images of the heavy atom 20-structure ensembles for A) AIP-I; B) AIP-II; C) AIP-IV Conformation A; and D) AIP-IV Conformation B. For all structures, carbon is silver, oxygen is red, nitrogen is blue, and sulfur is yellow. Residues labeled in cyan are pointing back, behind other residues.

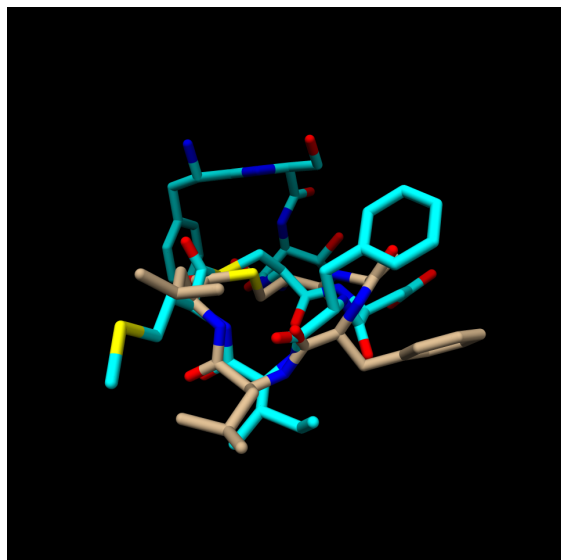

**Figure S-8.** Overlay of the heavy atom lowest energy structures for AIP-I (cyan) and tAIP-III D2A (tan).

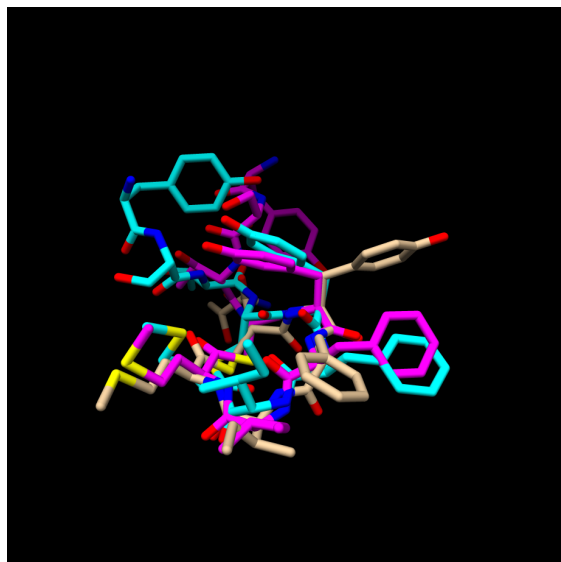

**Figure S-9.** Overlay of AIP-IV structures: heavy atom lowest energy structures for AIP-IV conformation A (cyan) and AIP-IV conformation B (magenta), and the structure of AIP-IV from the X-ray crystal structure of the quorum-quenching antibody AP4-24H11 Fab in complex with AIP-IV (tan; from Kirchdoerfer *et al.*, PDB ID 3QG6).<sup>4</sup> See main text.

**BMRB accession numbers.**

*Pdb file deposition website:* <http://smsdep.protein.osaka-u.ac.jp/bmr-b-adit/>

**Table S-13.** BMRB accession numbers for each peptide in this study

---

| Peptide      | BMRB accession number |
|--------------|-----------------------|
| AIP-III      | 21035                 |
| AIP-III D4A  | 21036                 |
| AIP-III D-F5 | 21037                 |
| AIP-III D-L7 | 21038                 |
| AIP-III F5A  | 21039                 |
| AIP-III L7A  | 21040                 |
| tAIP-III     | 21041                 |
| tAIP-III D2A | 21042                 |
| AIP-I        | 21045                 |
| AIP-II       | 21046                 |
| AIP-IV       | 21047                 |

---

## **NMR spectra.**

All NMR spectra were obtained on a 600 MHz instrument (see main text for full details of methods and instrumentation). For each peptide, a  $^1\text{H}$  1-D spectrum and overlays of the COSY, TOCSY, and ROESY spectra are provided (divided into six sections for easier viewing; COSY shown in green, TOCSY shown in blue, and ROESY shown in red). Peak assignments are shown in black text on the 2-D spectral overlays.

### **AIP-III**

1-D spectrum

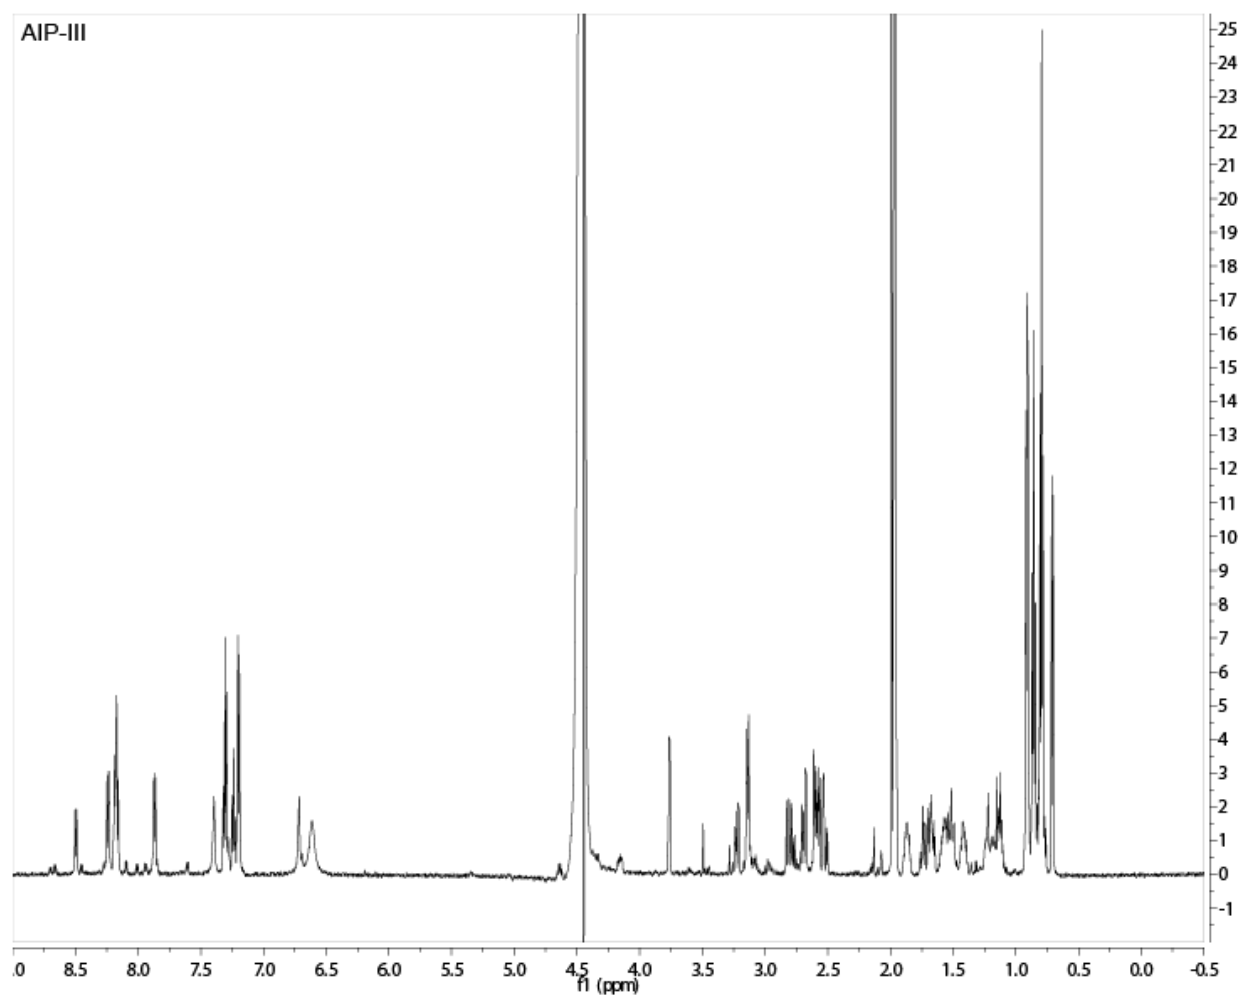



AIP-III fingerprint region 2

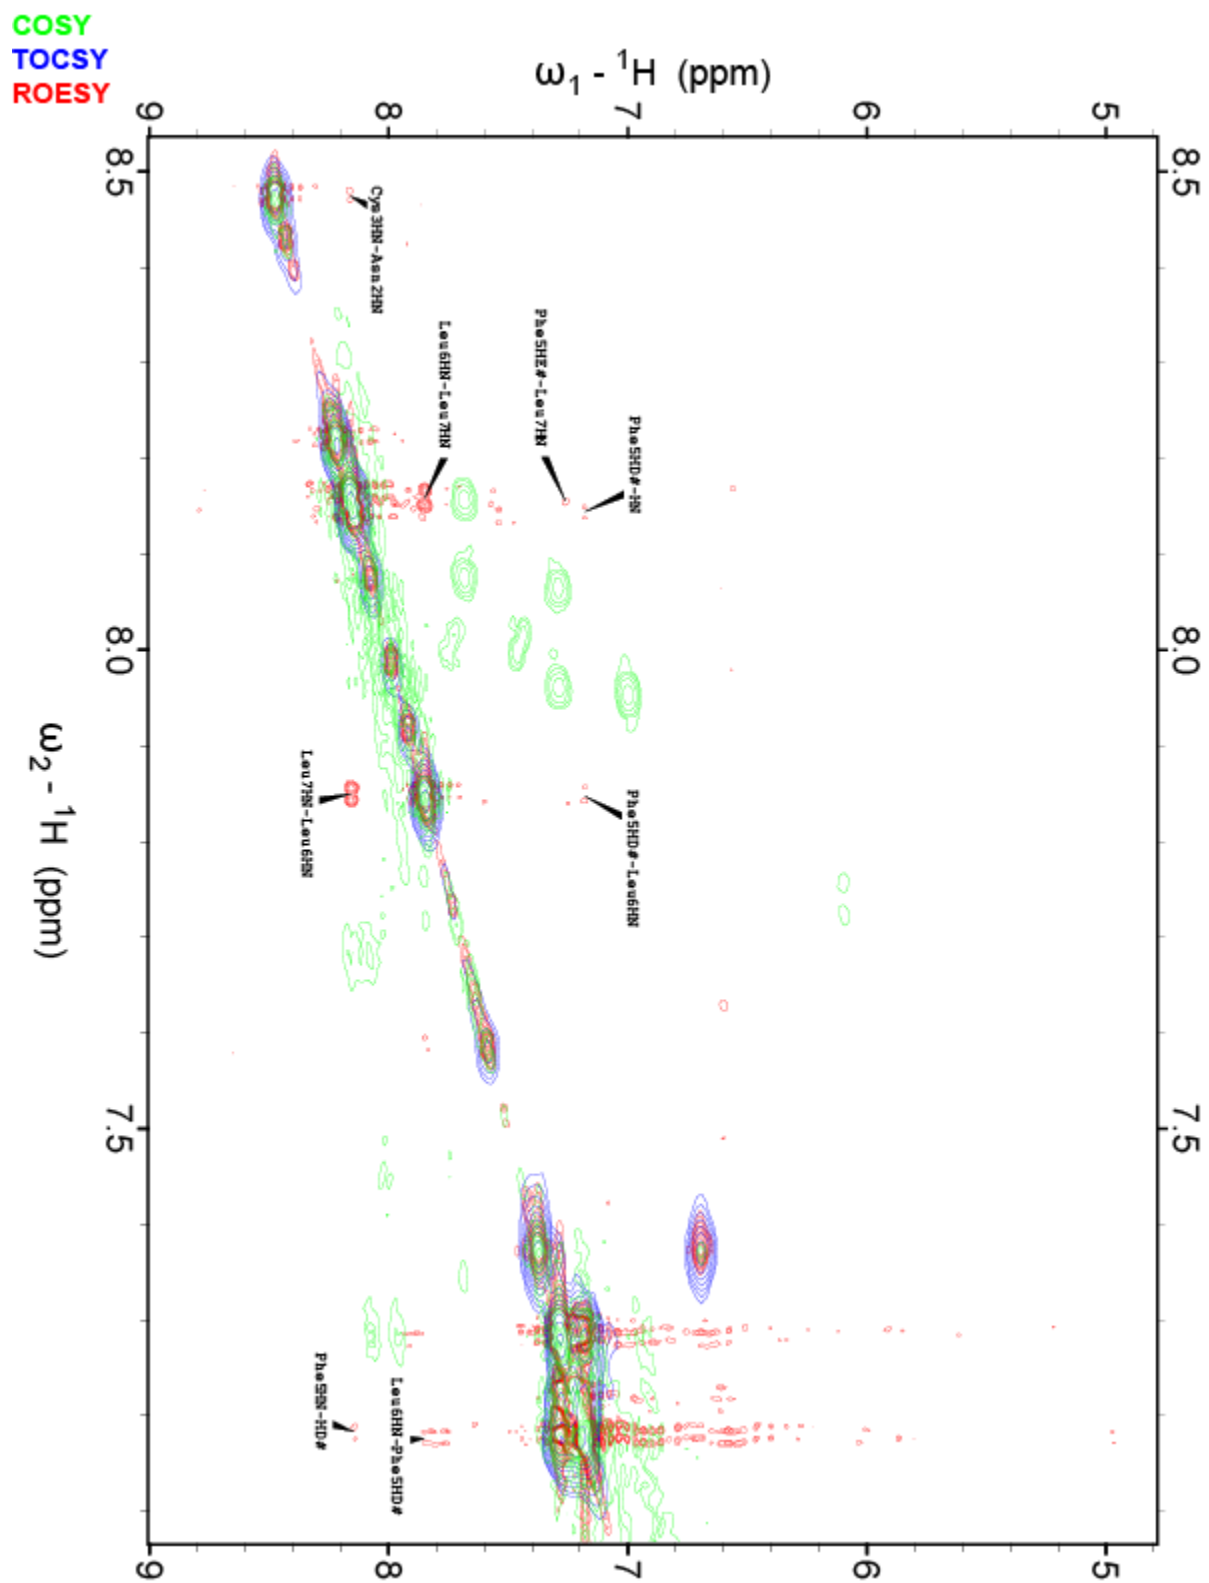

AIP-III C-alpha region 1

COSY  
TOCSY  
ROESY

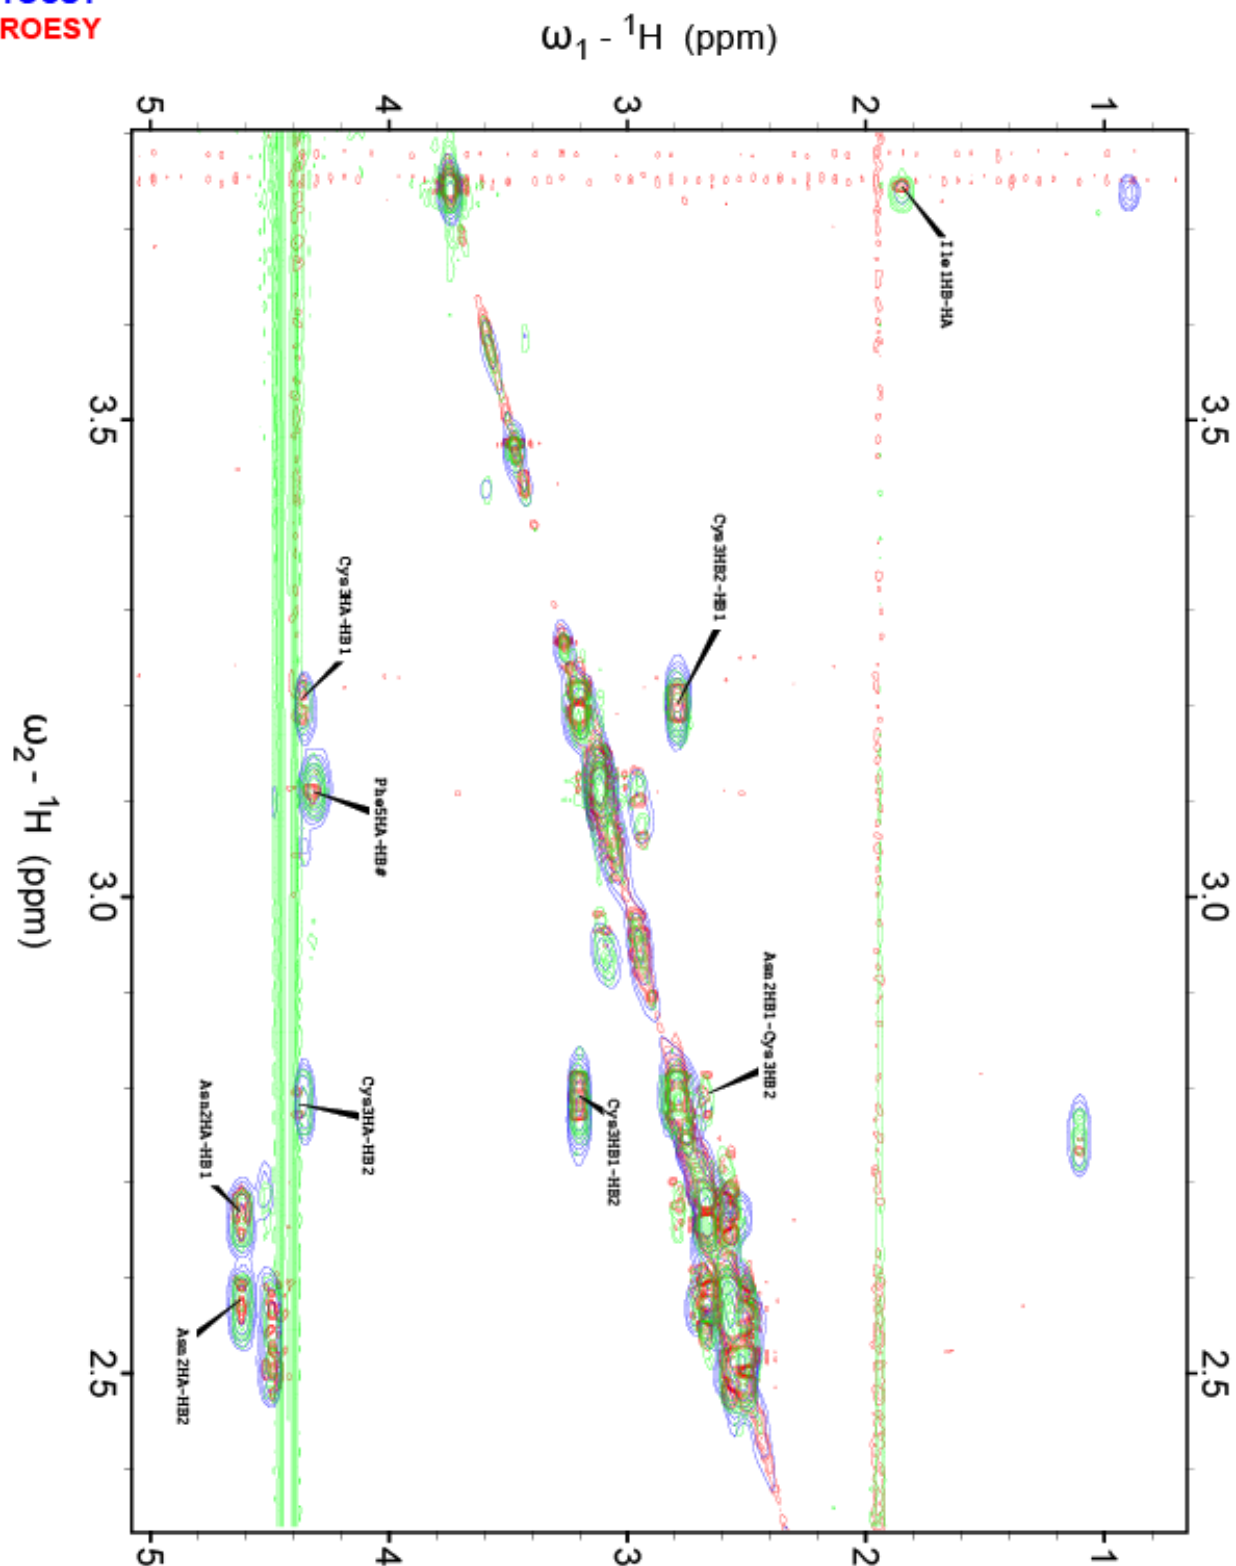

### AIP-III C-alpha region 2

COSY  
TOCSY  
ROESY

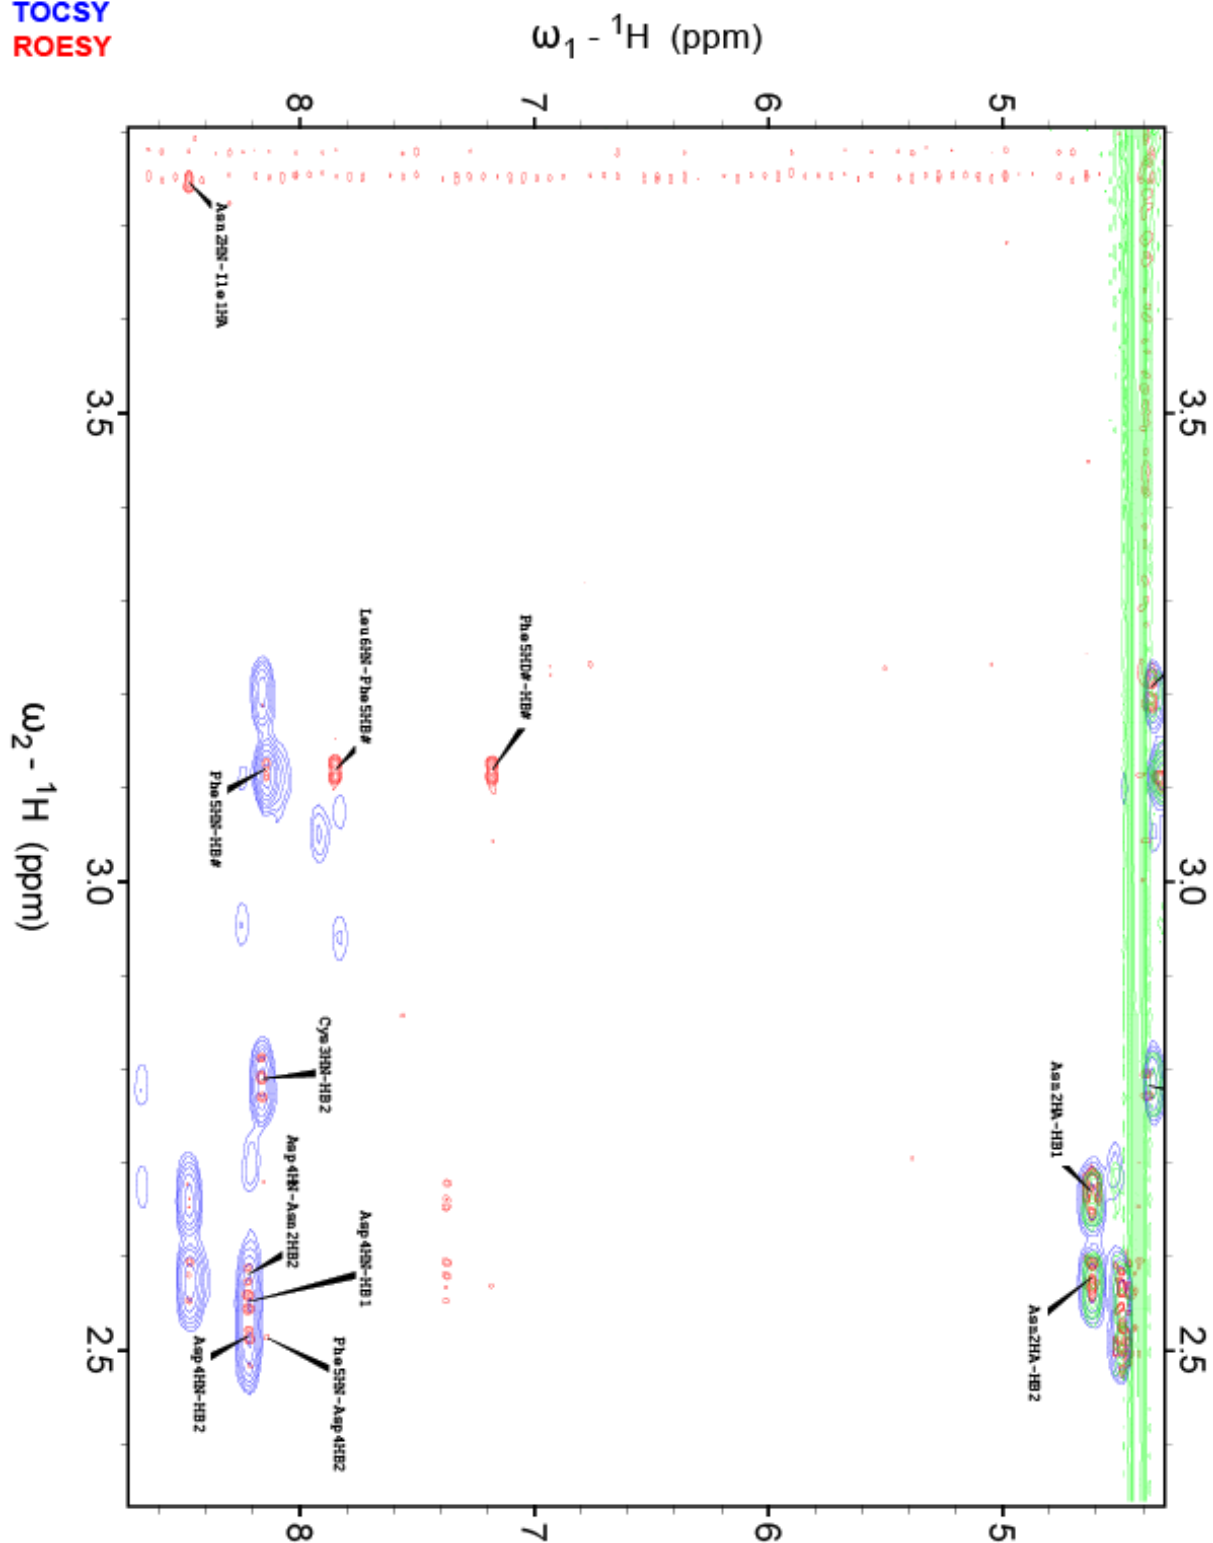



AIP-III aliphatic region 1

**COSY**  
**TOCSY**  
**ROESY**

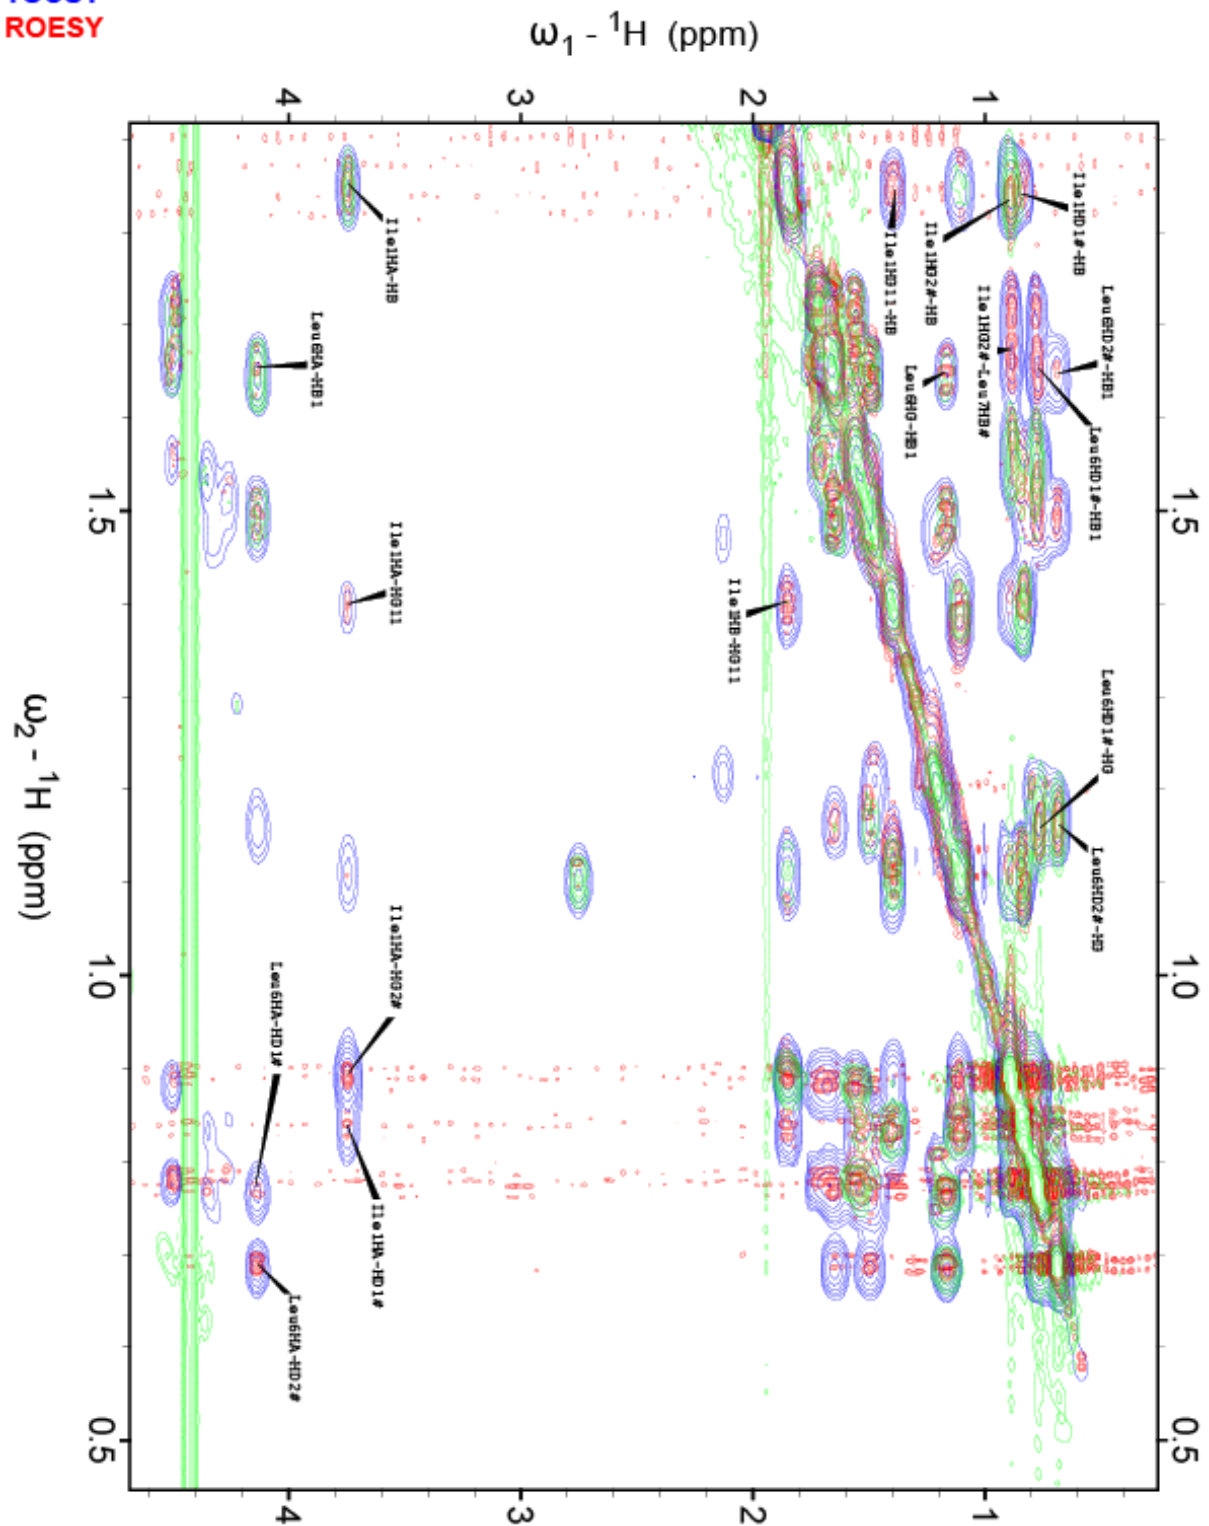

AIP-III aliphatic region 2

COSY  
TOCSY  
ROESY

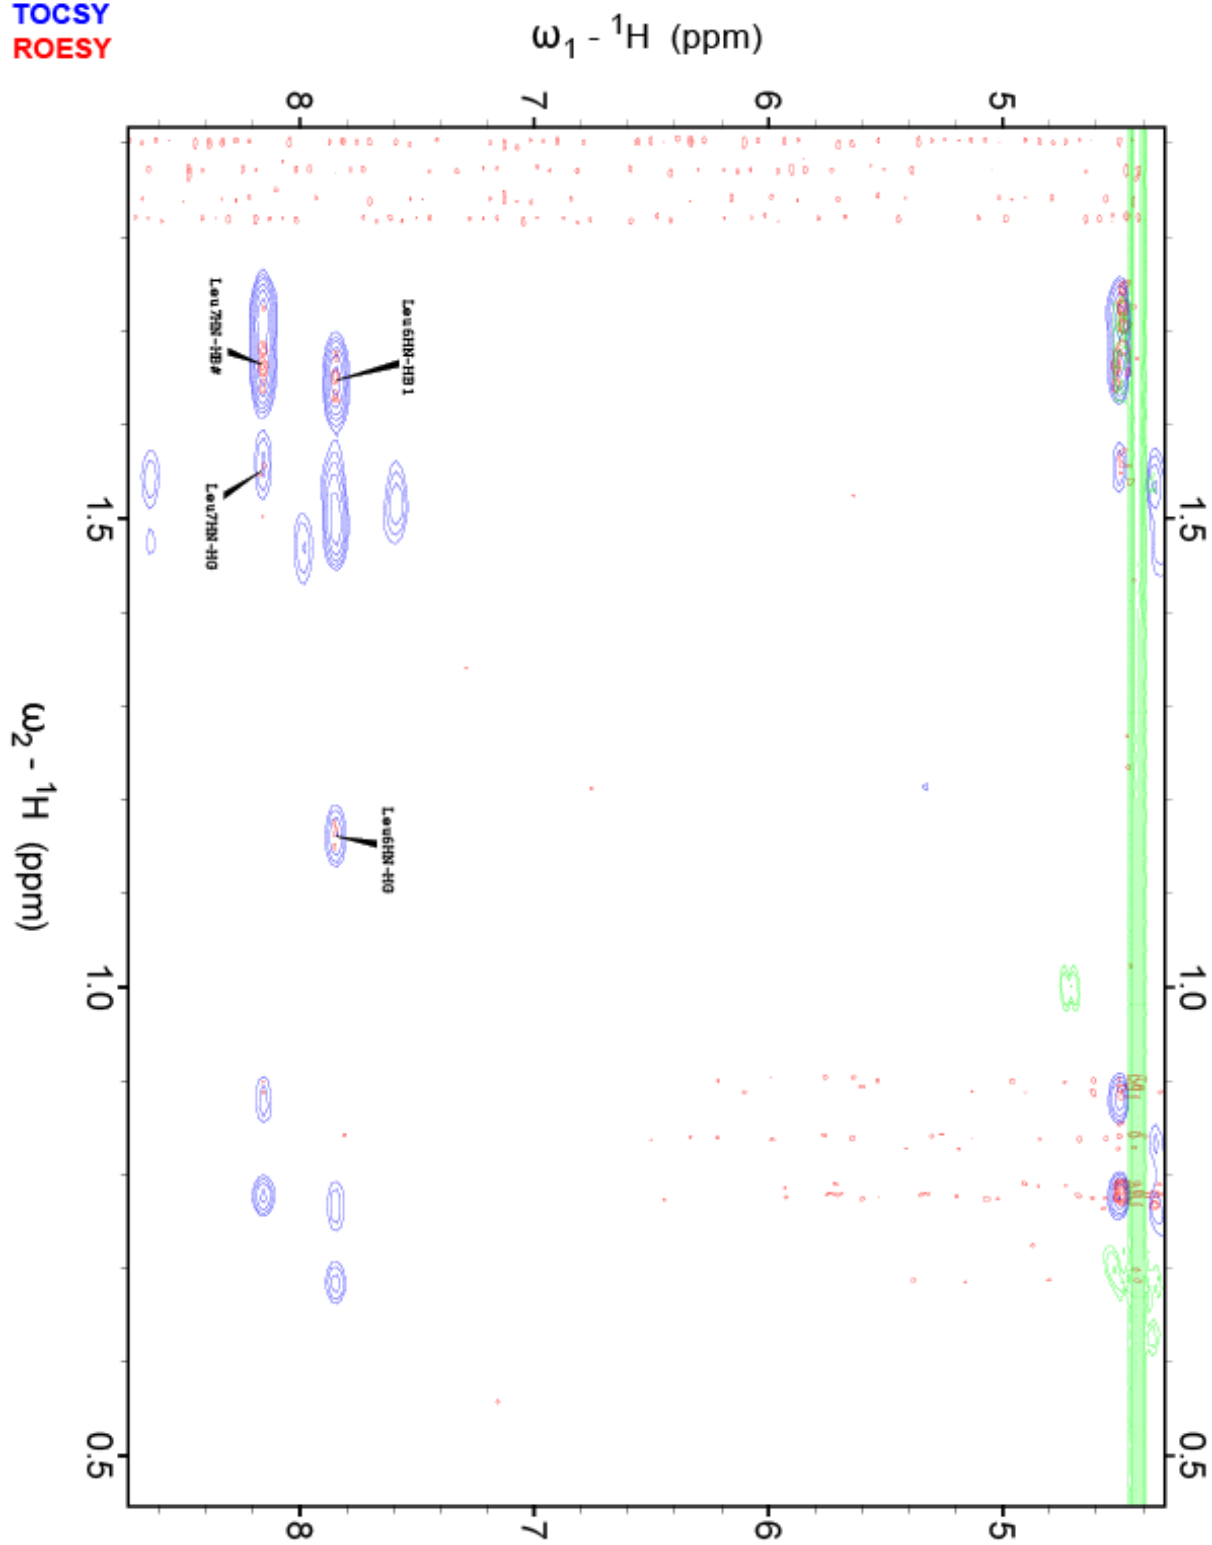

**AIP-III D4A**  
1-D spectrum

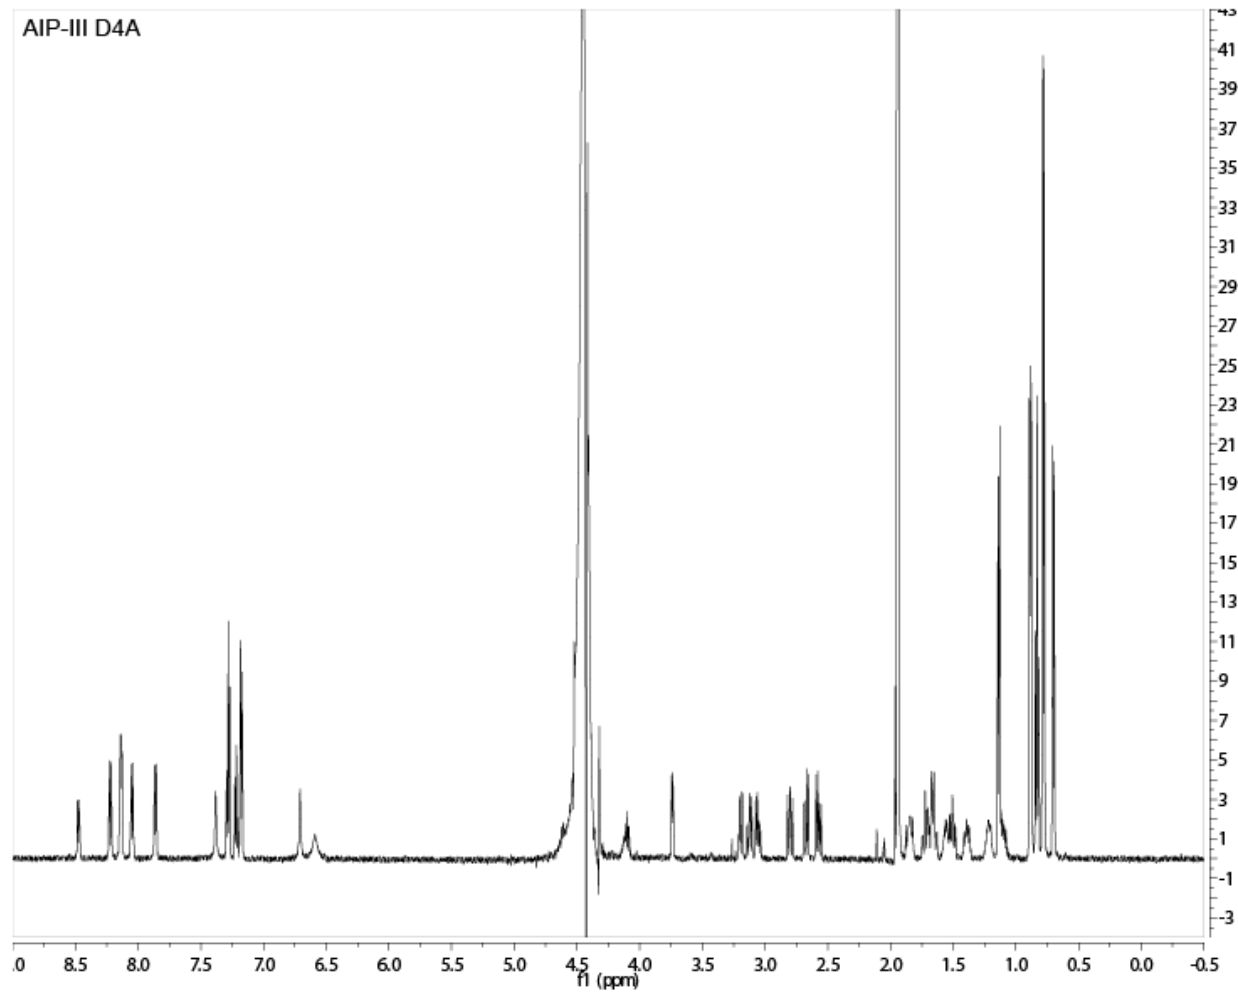

AIP-III D4A fingerprint region 1

COSY  
TOCSY  
ROESY

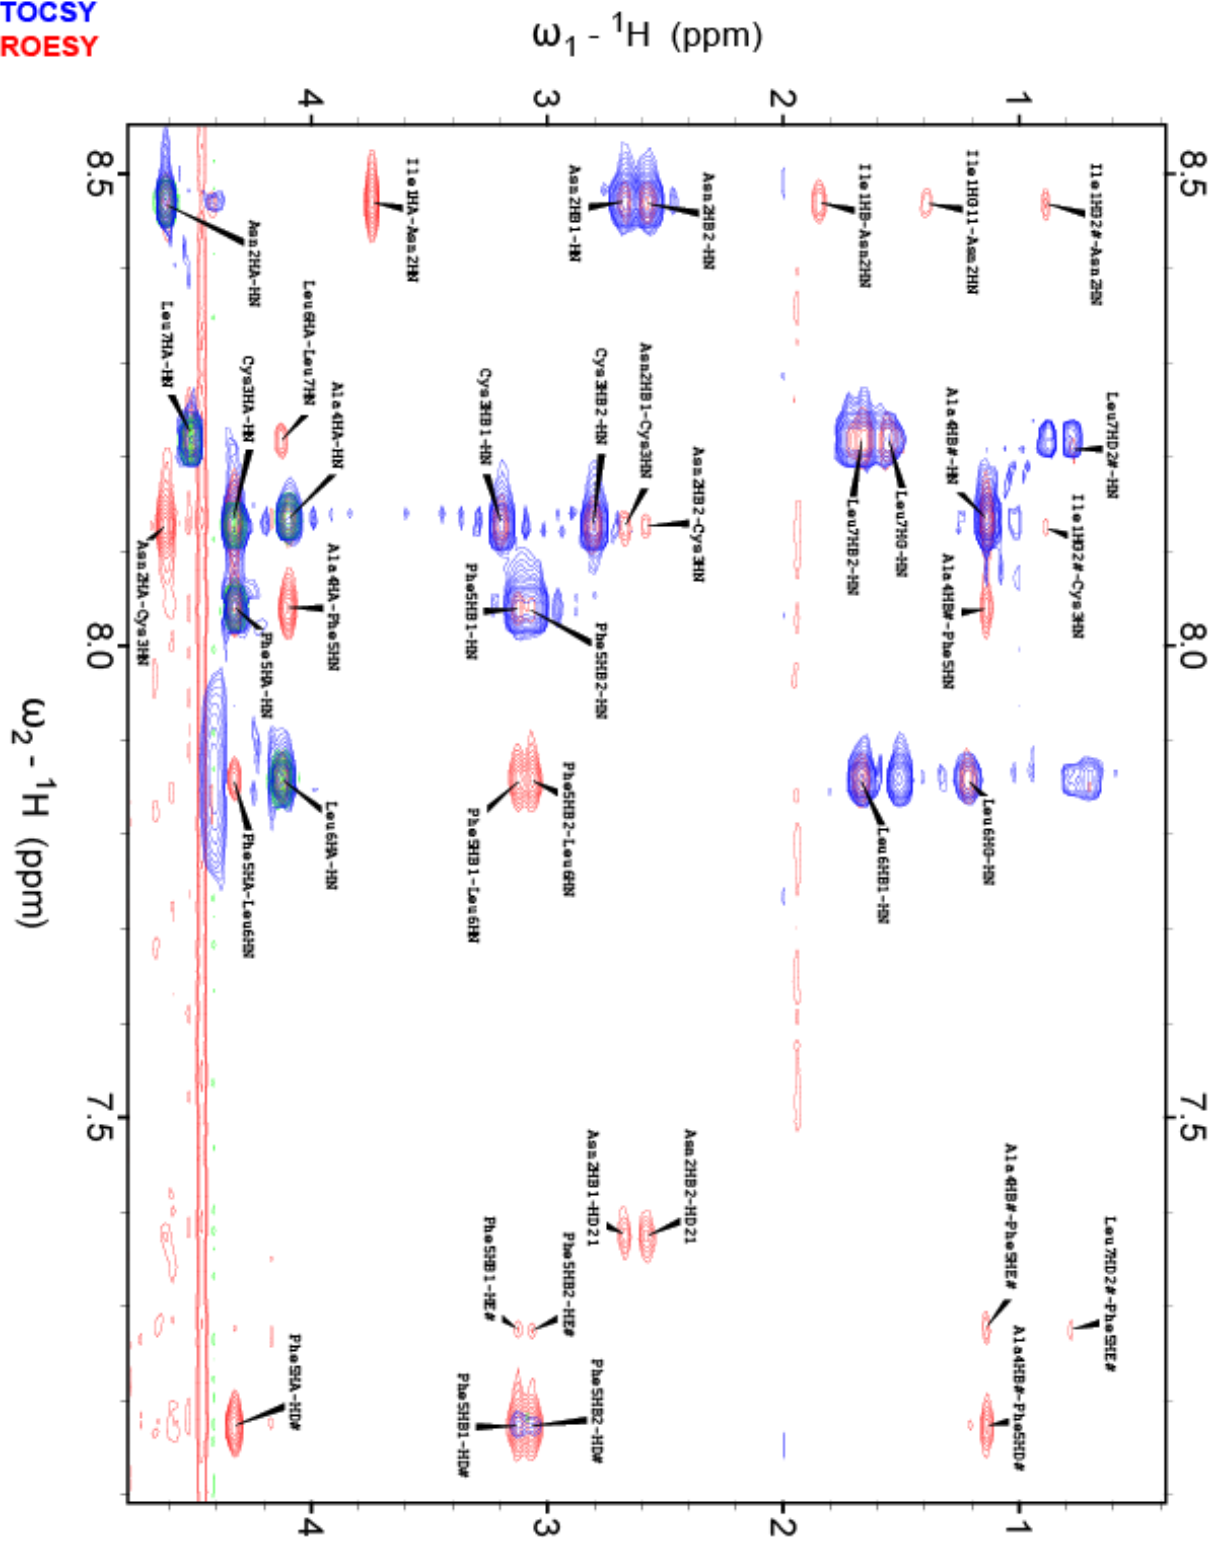

AIP-III D4A fingerprint region 2

COSY  
TOCSY  
ROESY

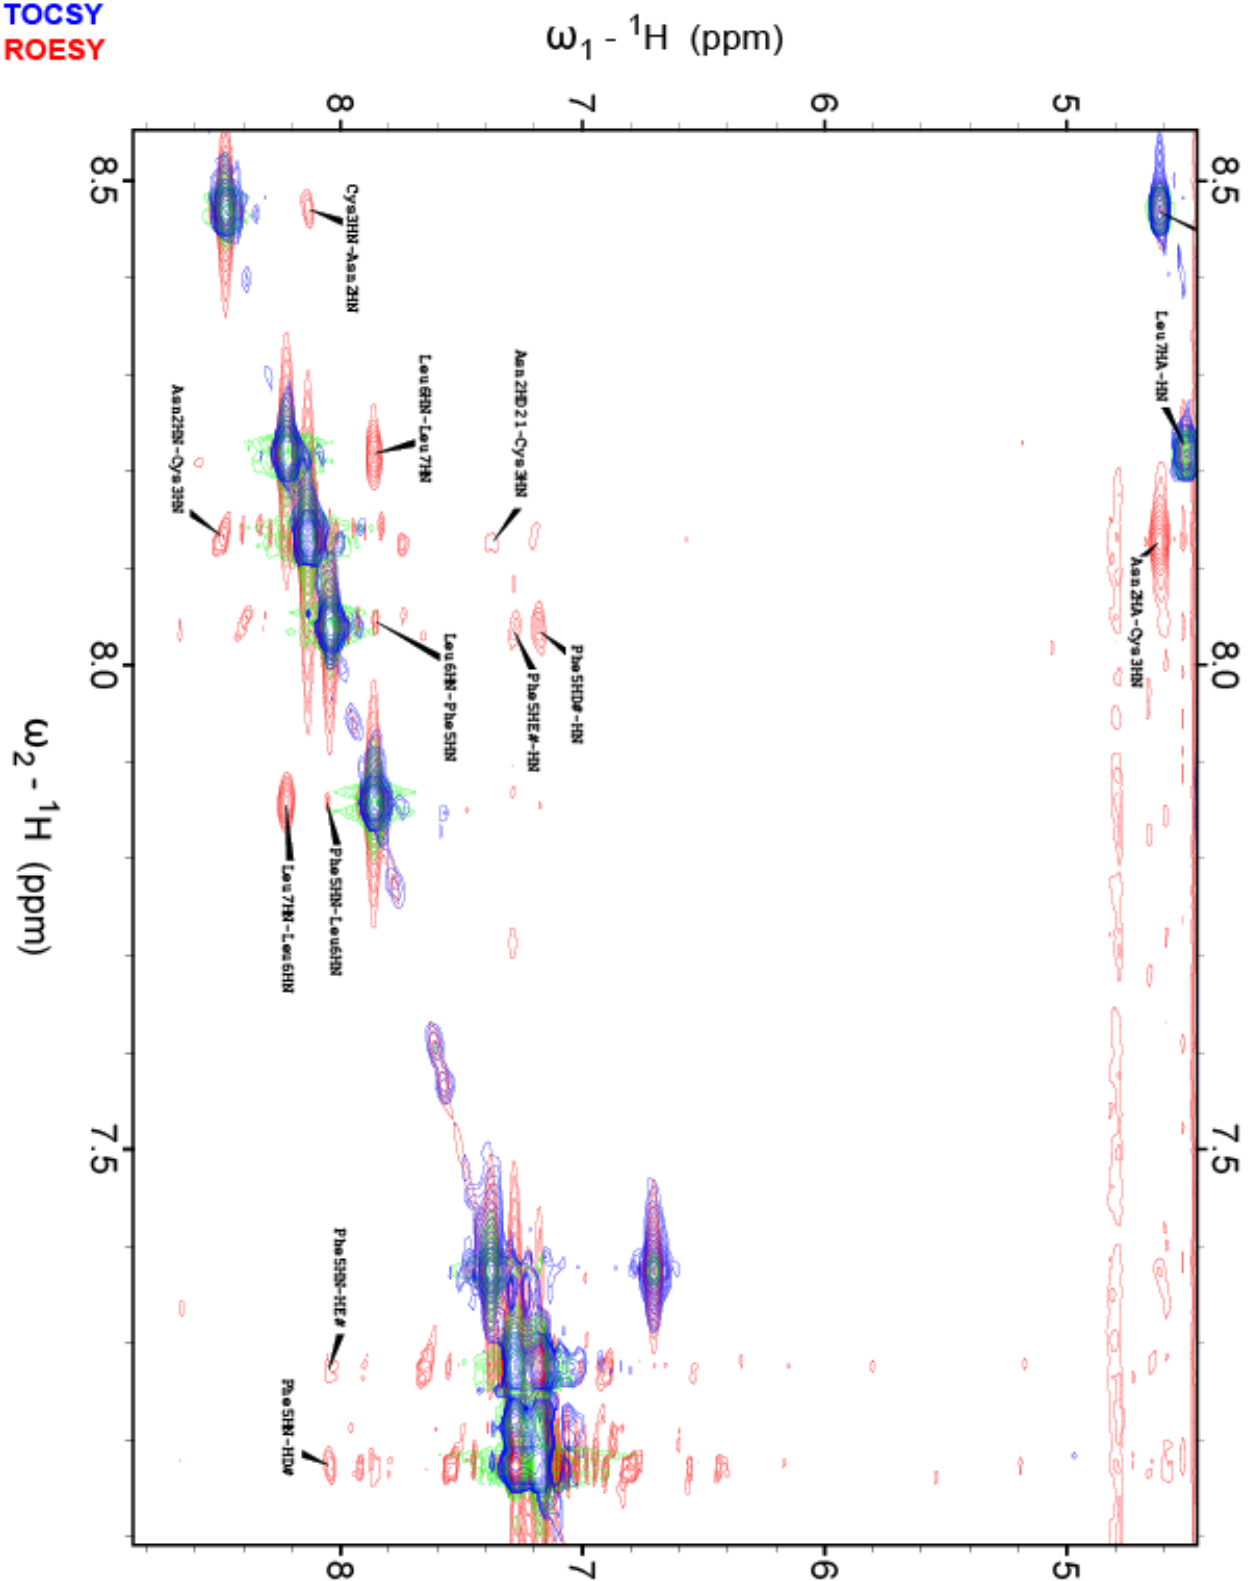

AIP-III D4A C-alpha region 1

COSY  
TOCSY  
ROESY

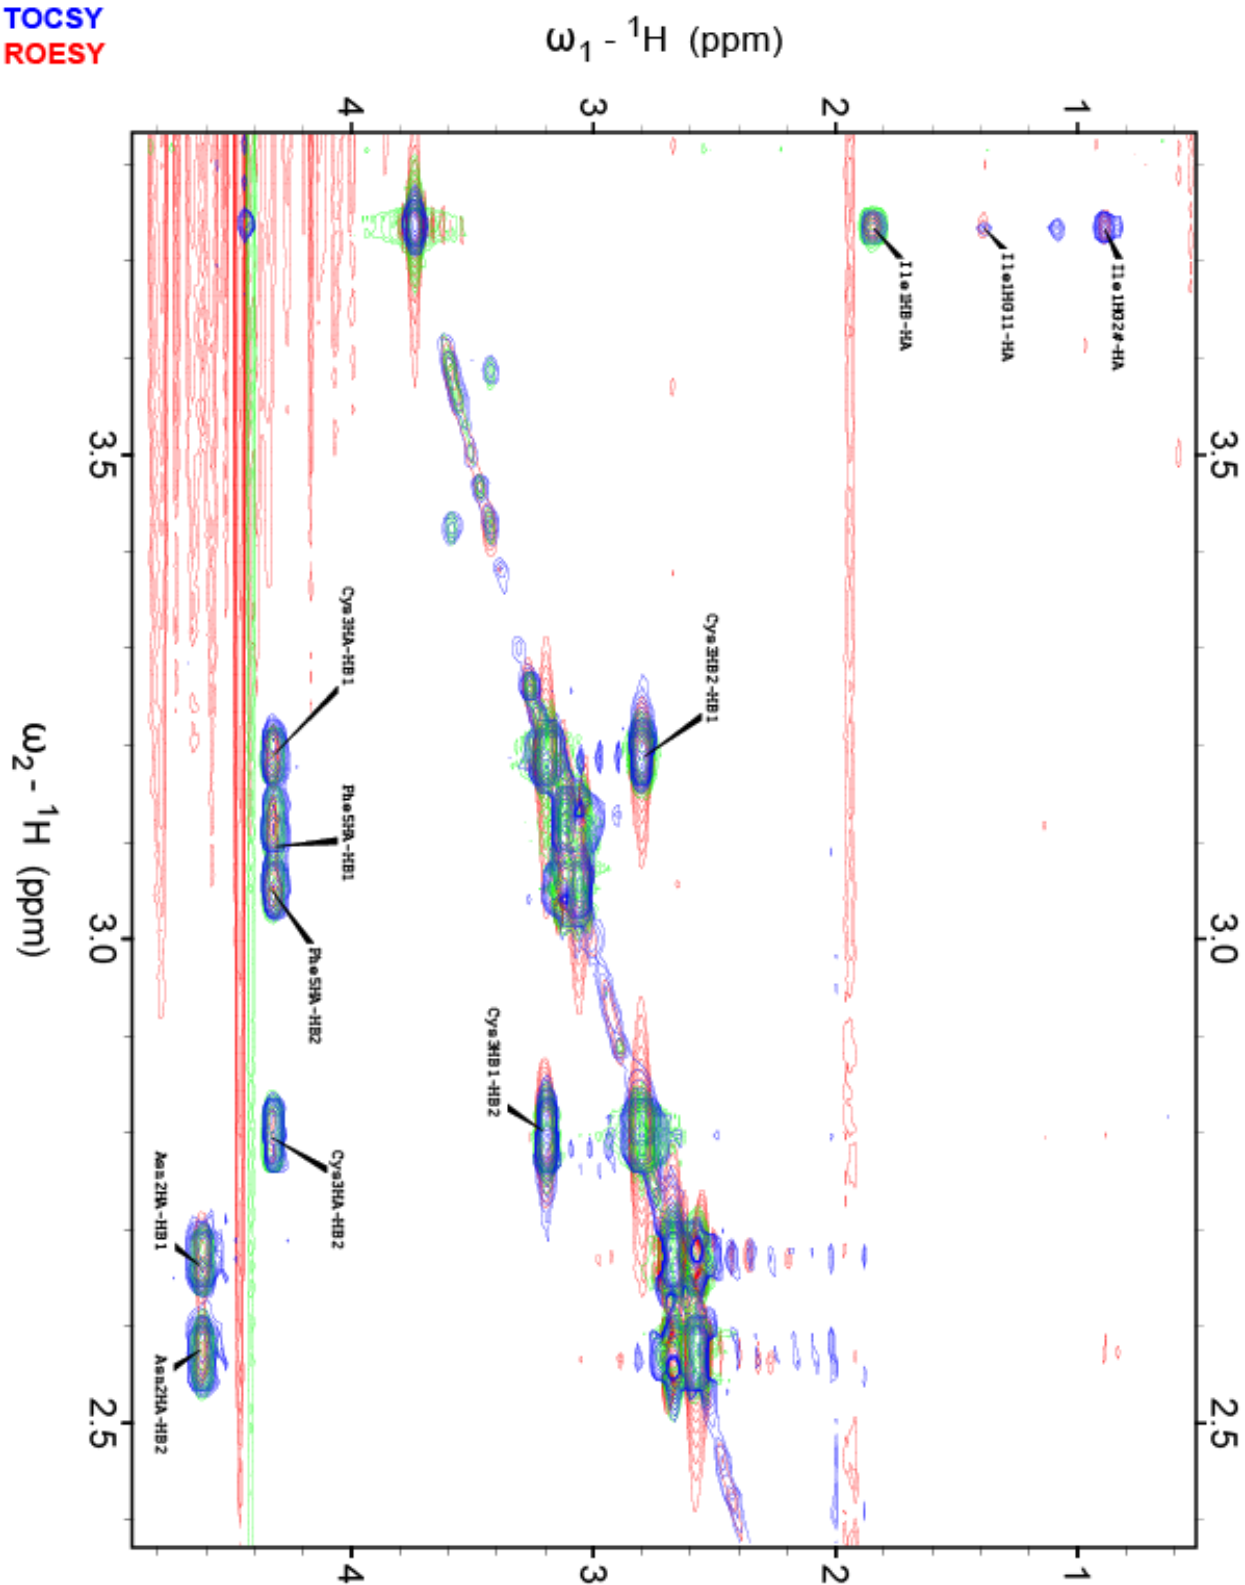

AIP-III D4A C-alpha region 2

COSY  
TOCSY  
ROESY

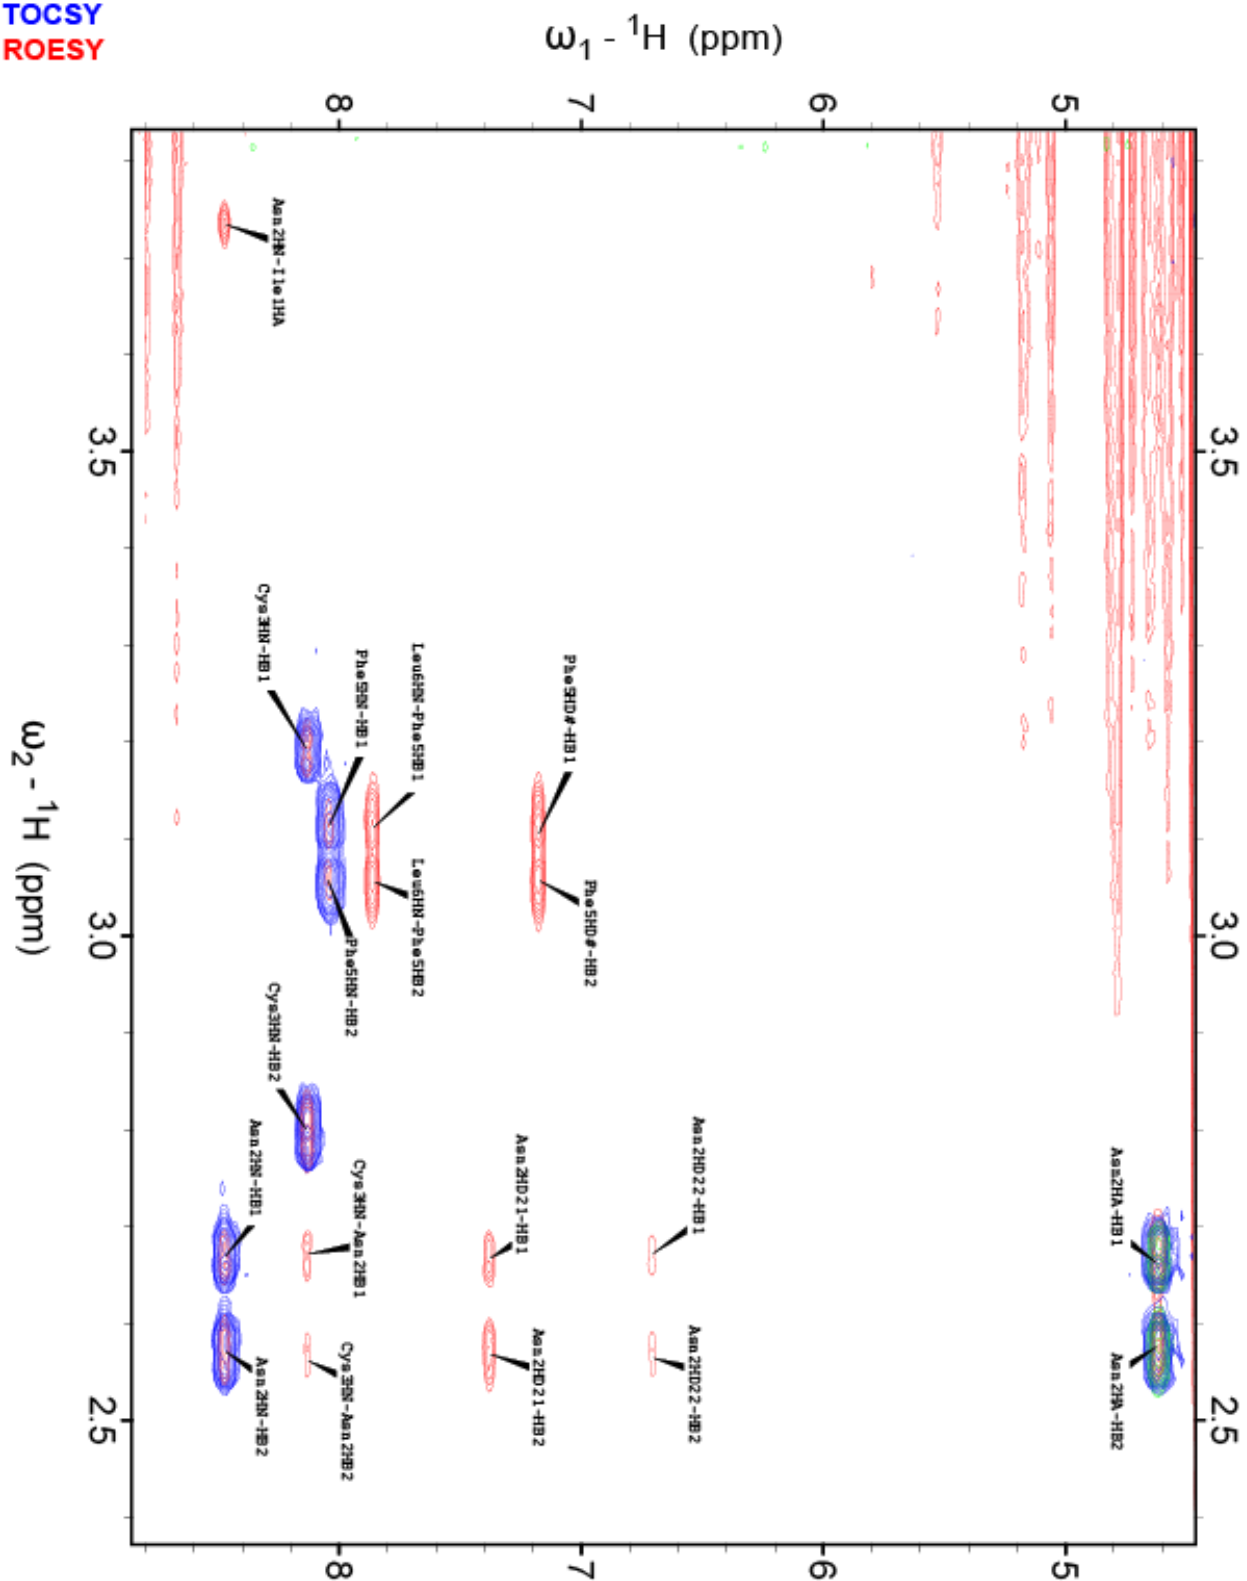

AIP-III D4A aliphatic region 1

COSY  
TOCSY  
ROESY

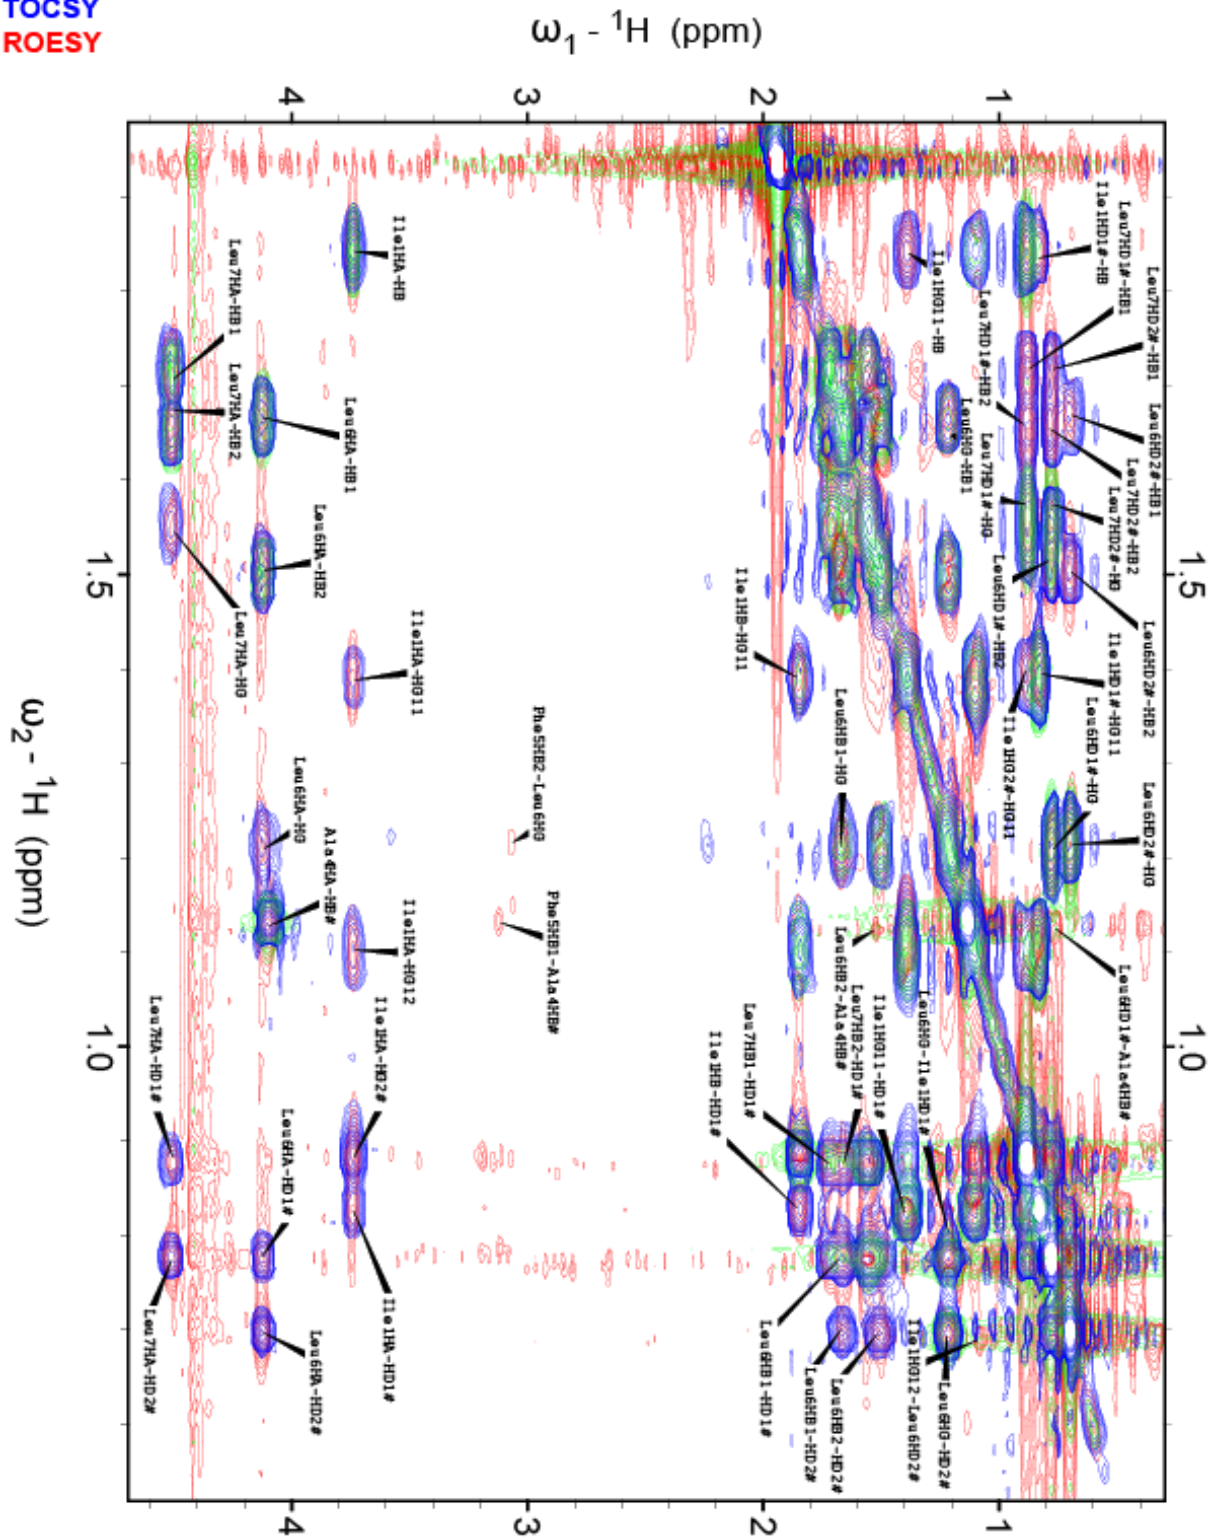



### AIP-III D4A aliphatic region 2

COSY  
TOCSY  
ROESY

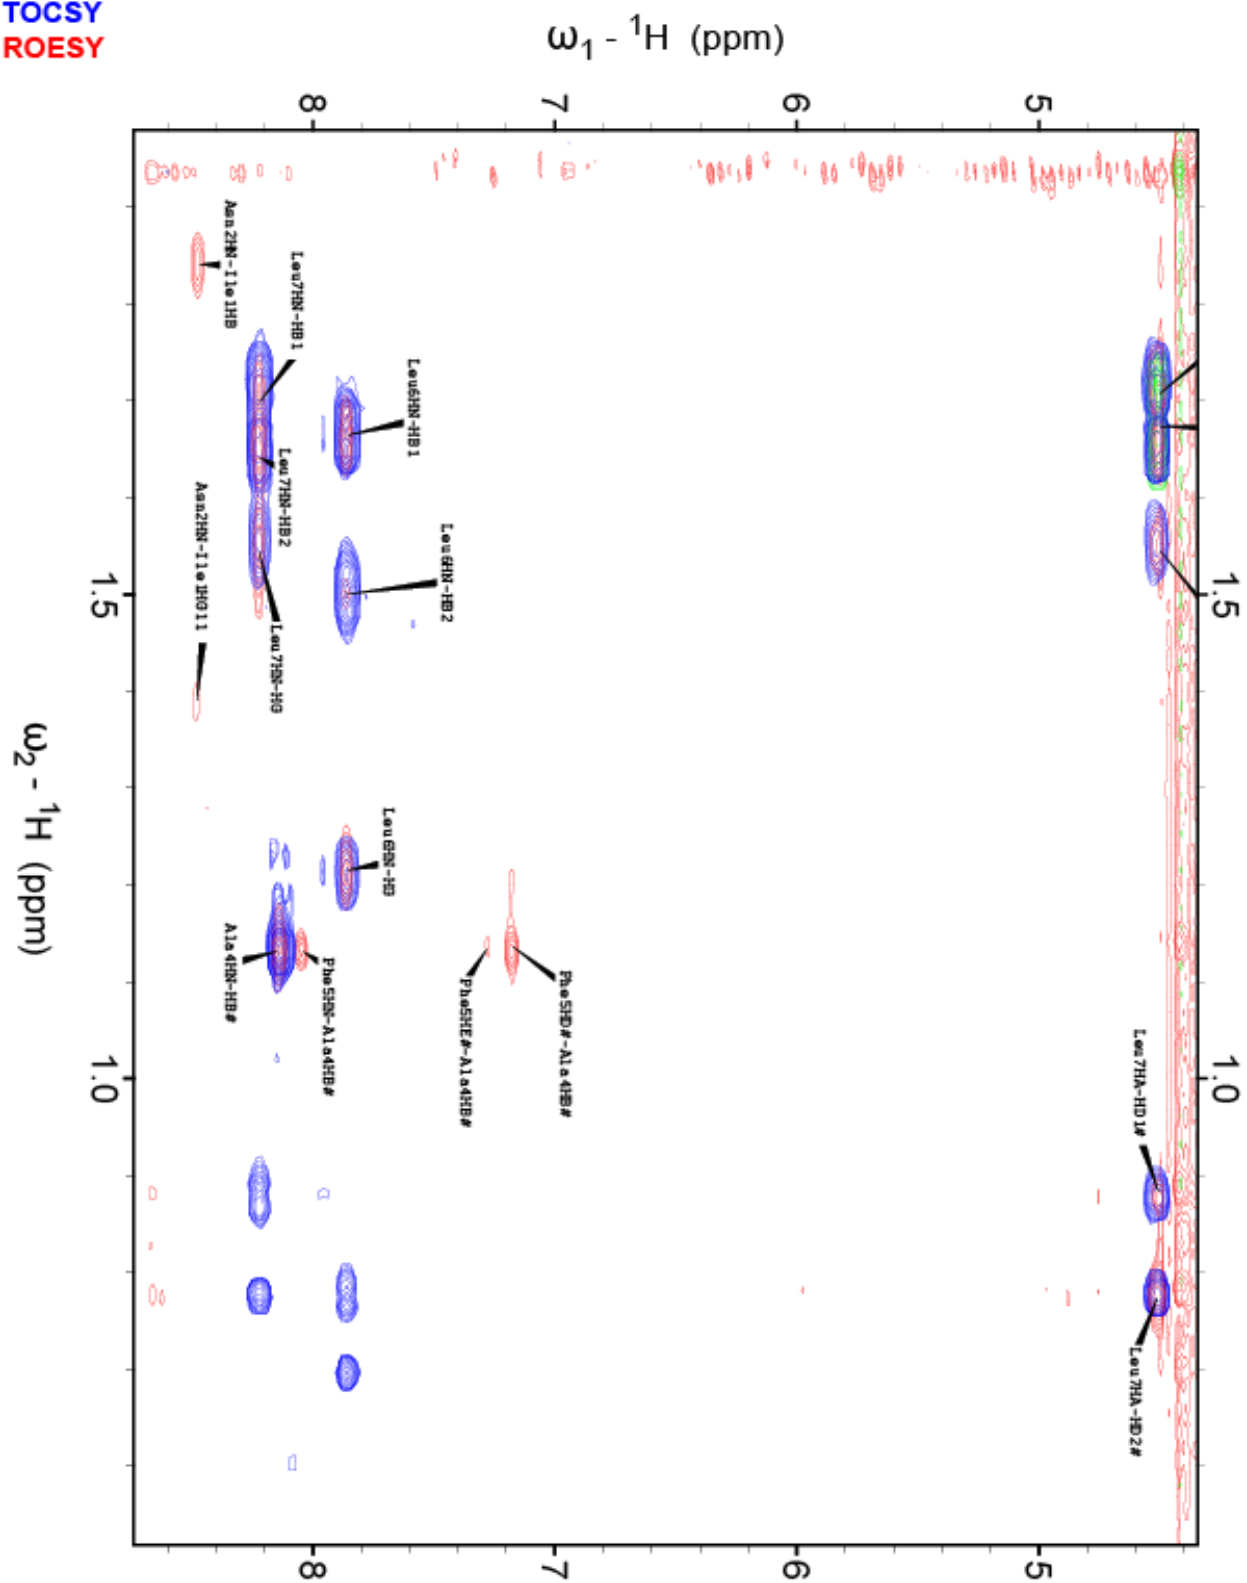

**tAIP-III**  
1-D spectrum

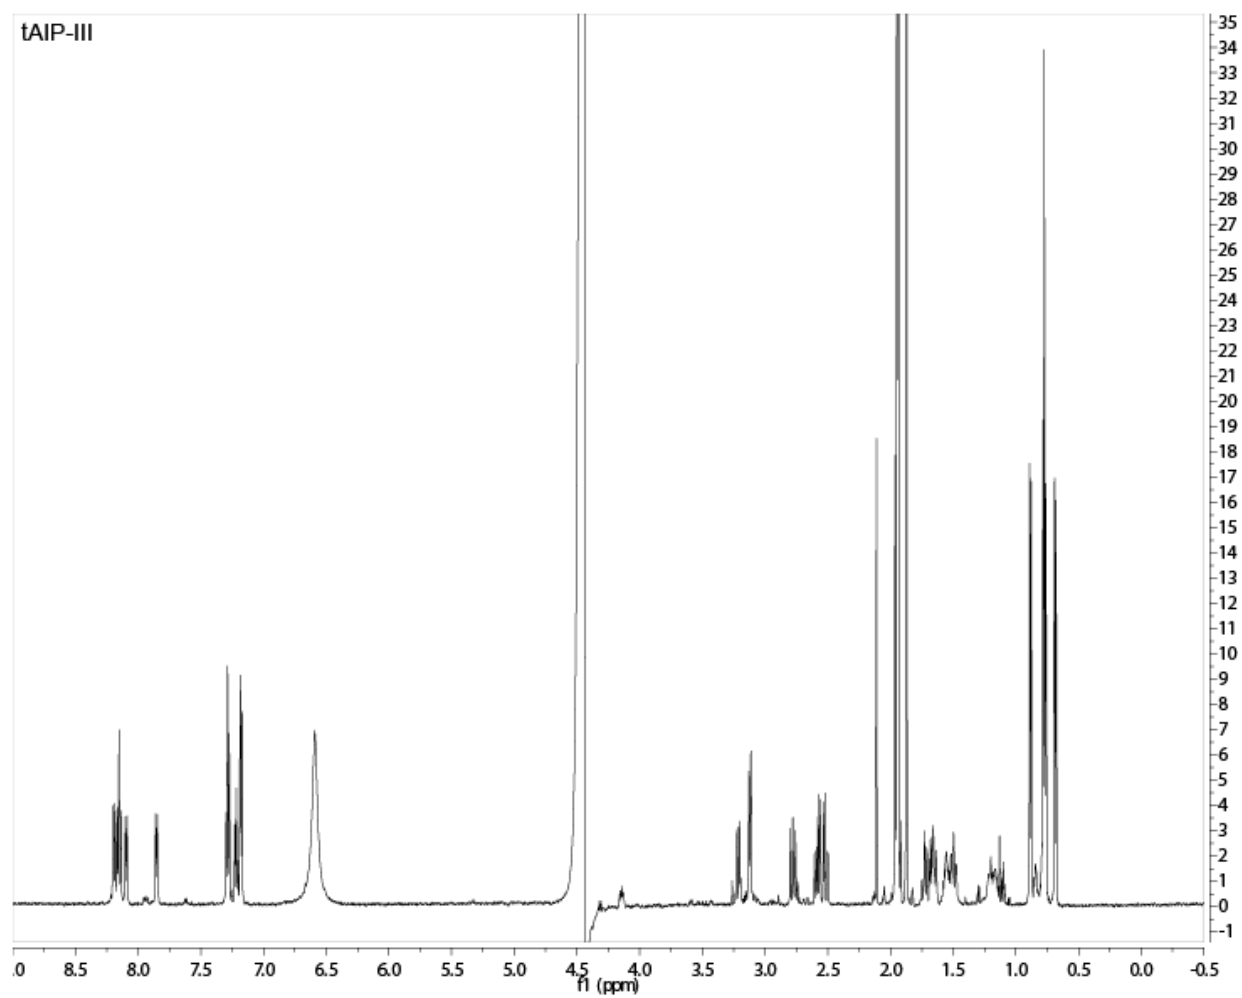

tAIP-III fingerprint region 1

COSY  
TOCSY  
ROESY

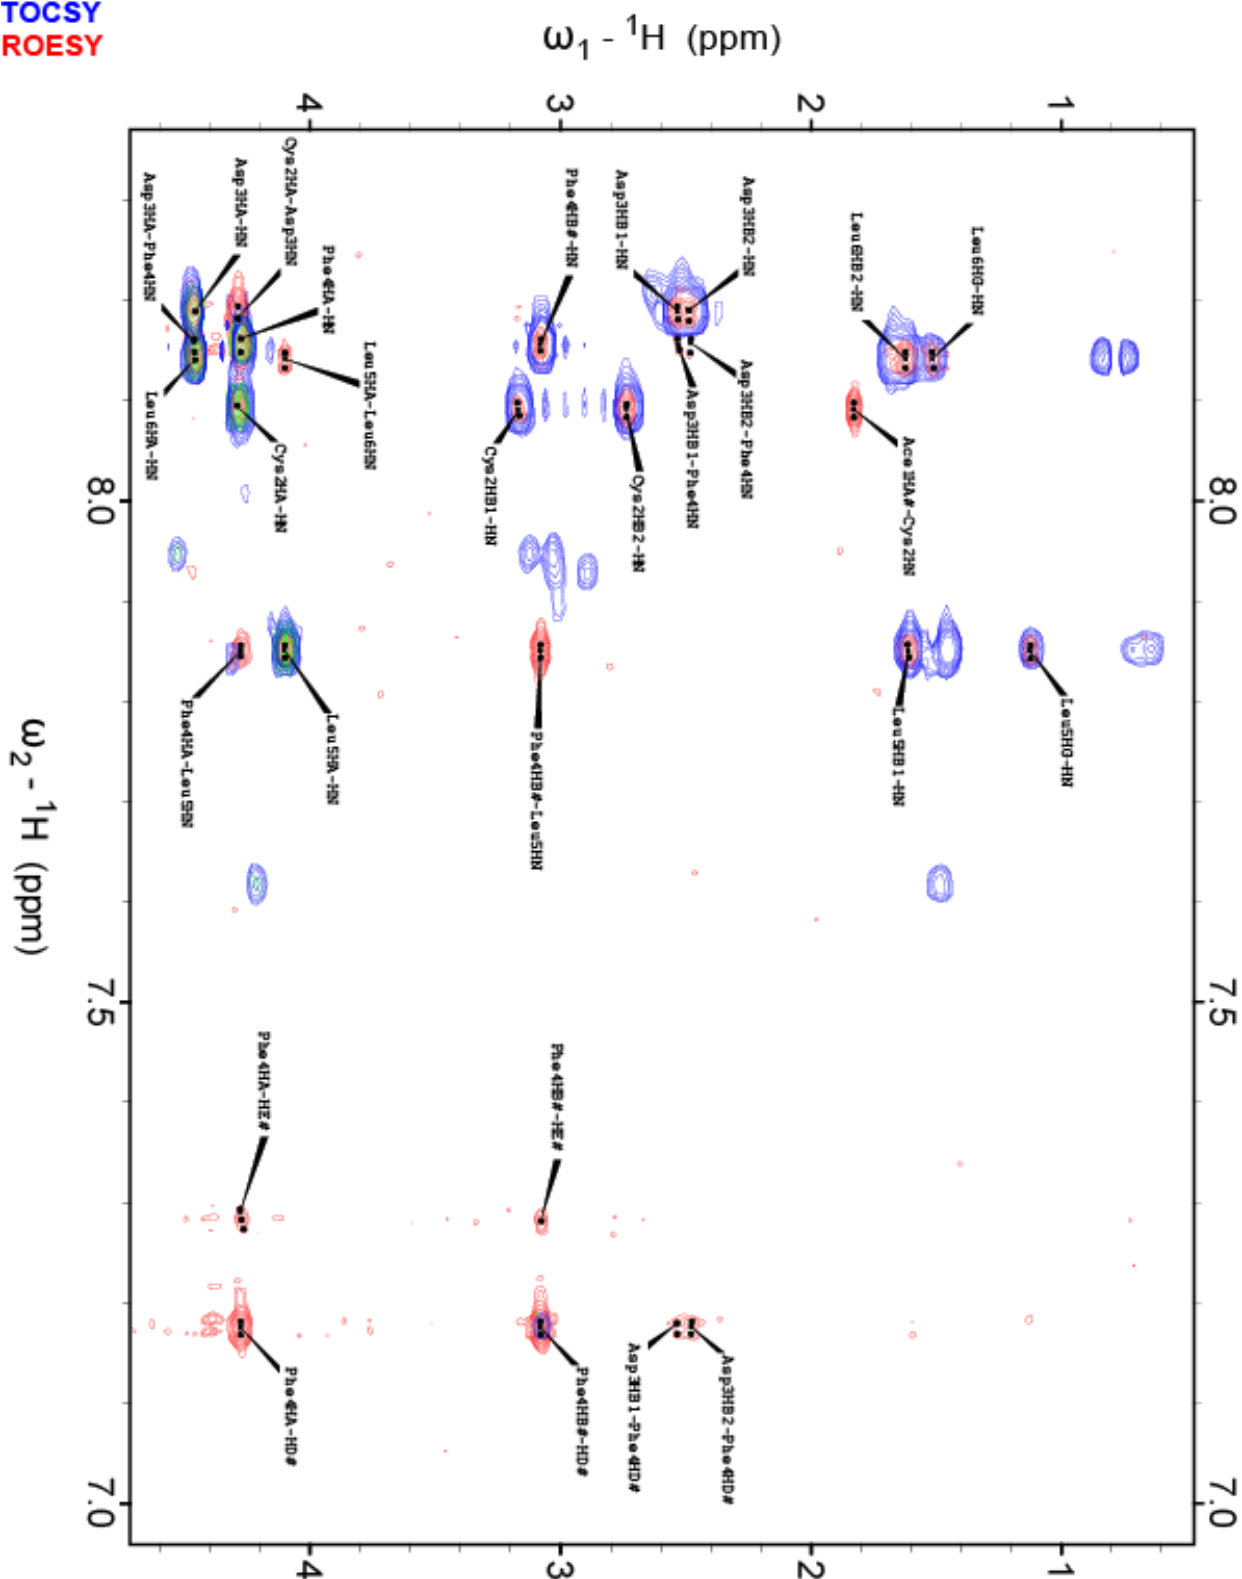

tAIP-III fingerprint region 2

COSY  
TOCSY  
ROESY

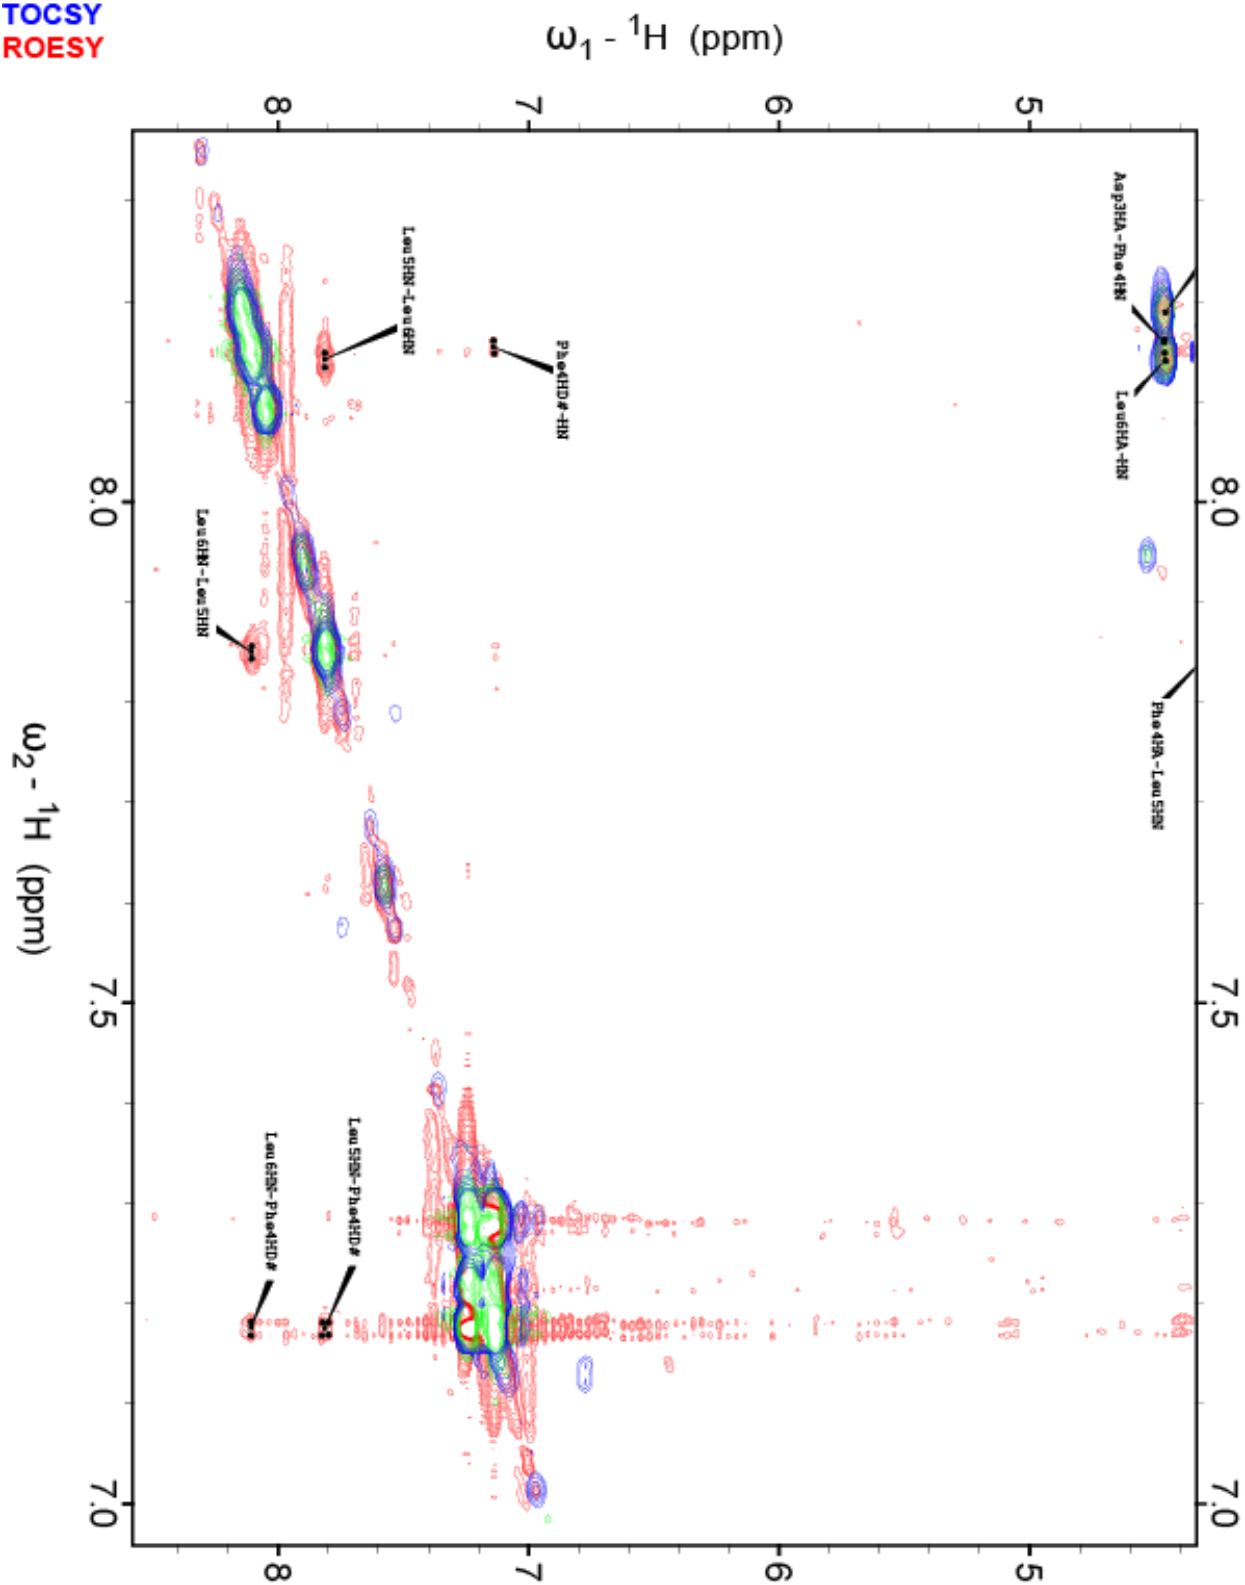

tAIP-III C-alpha region 1

COSY  
TOCSY  
ROESY

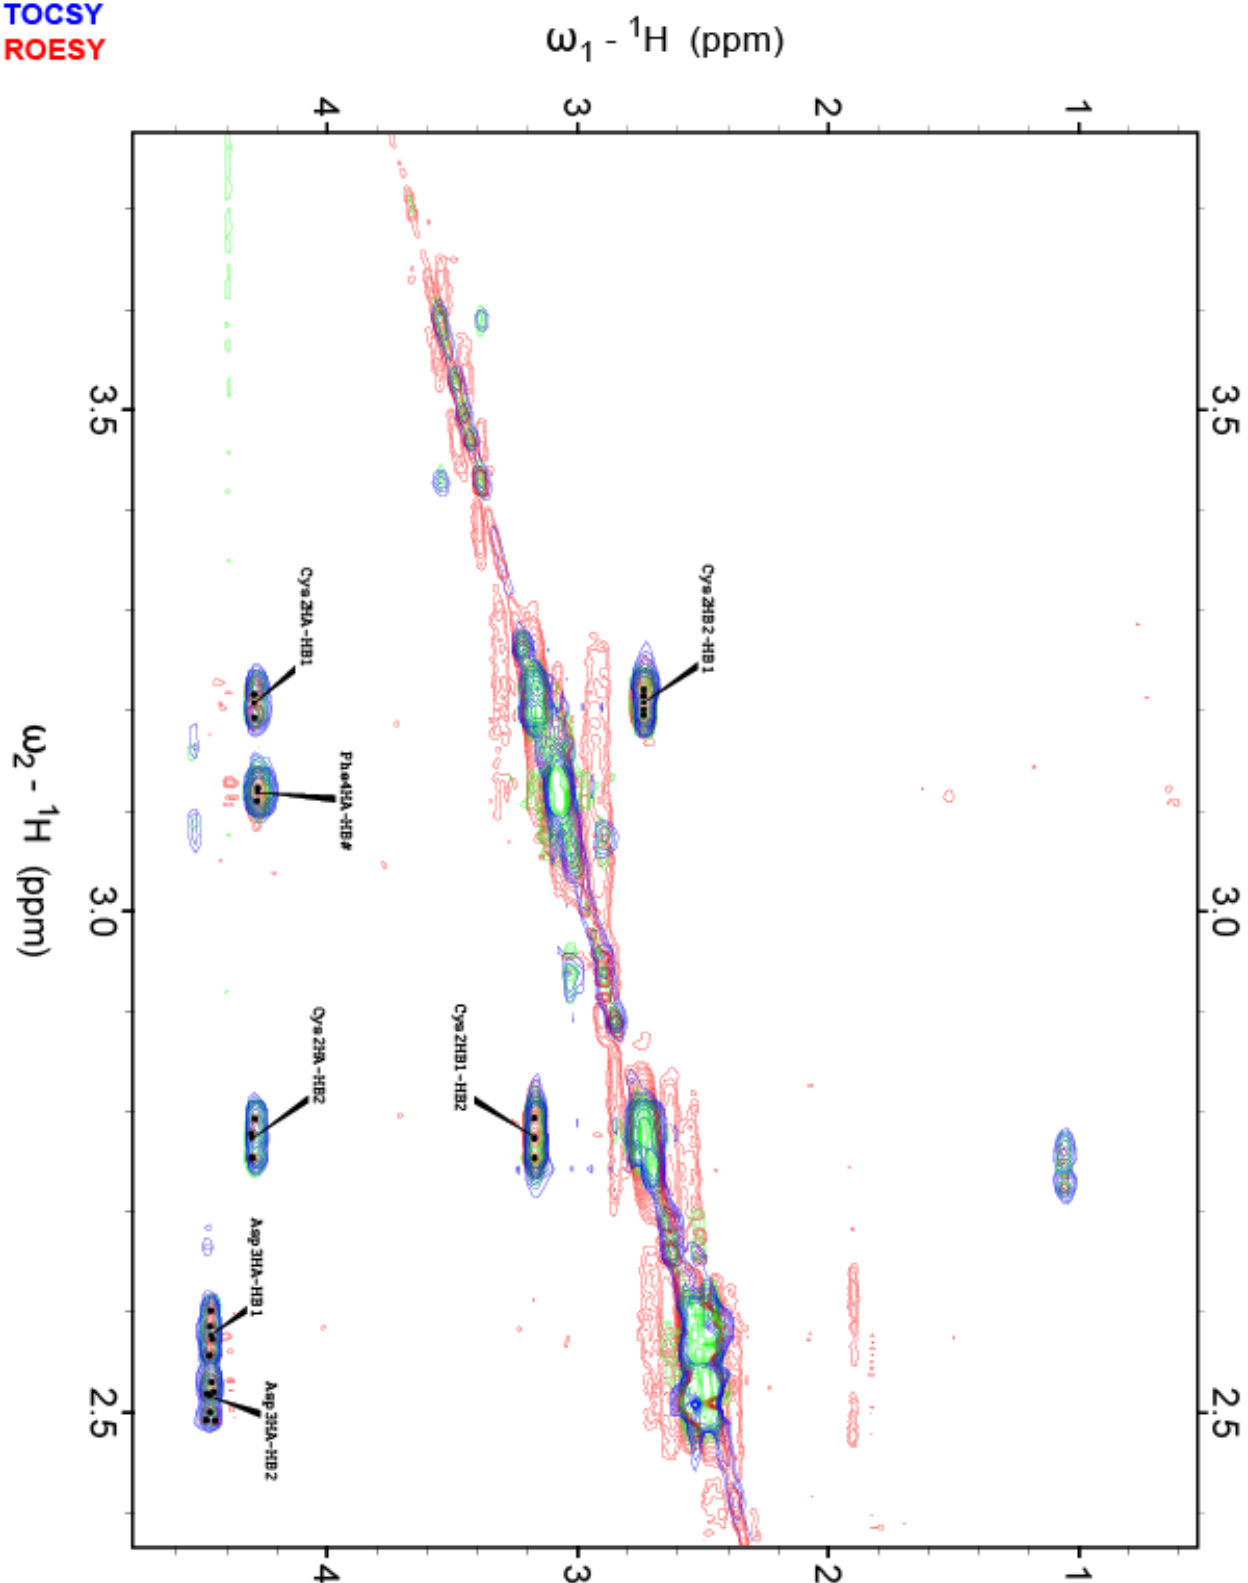

tAIP-III C-alpha region 2

COSY  
TOCSY  
ROESY

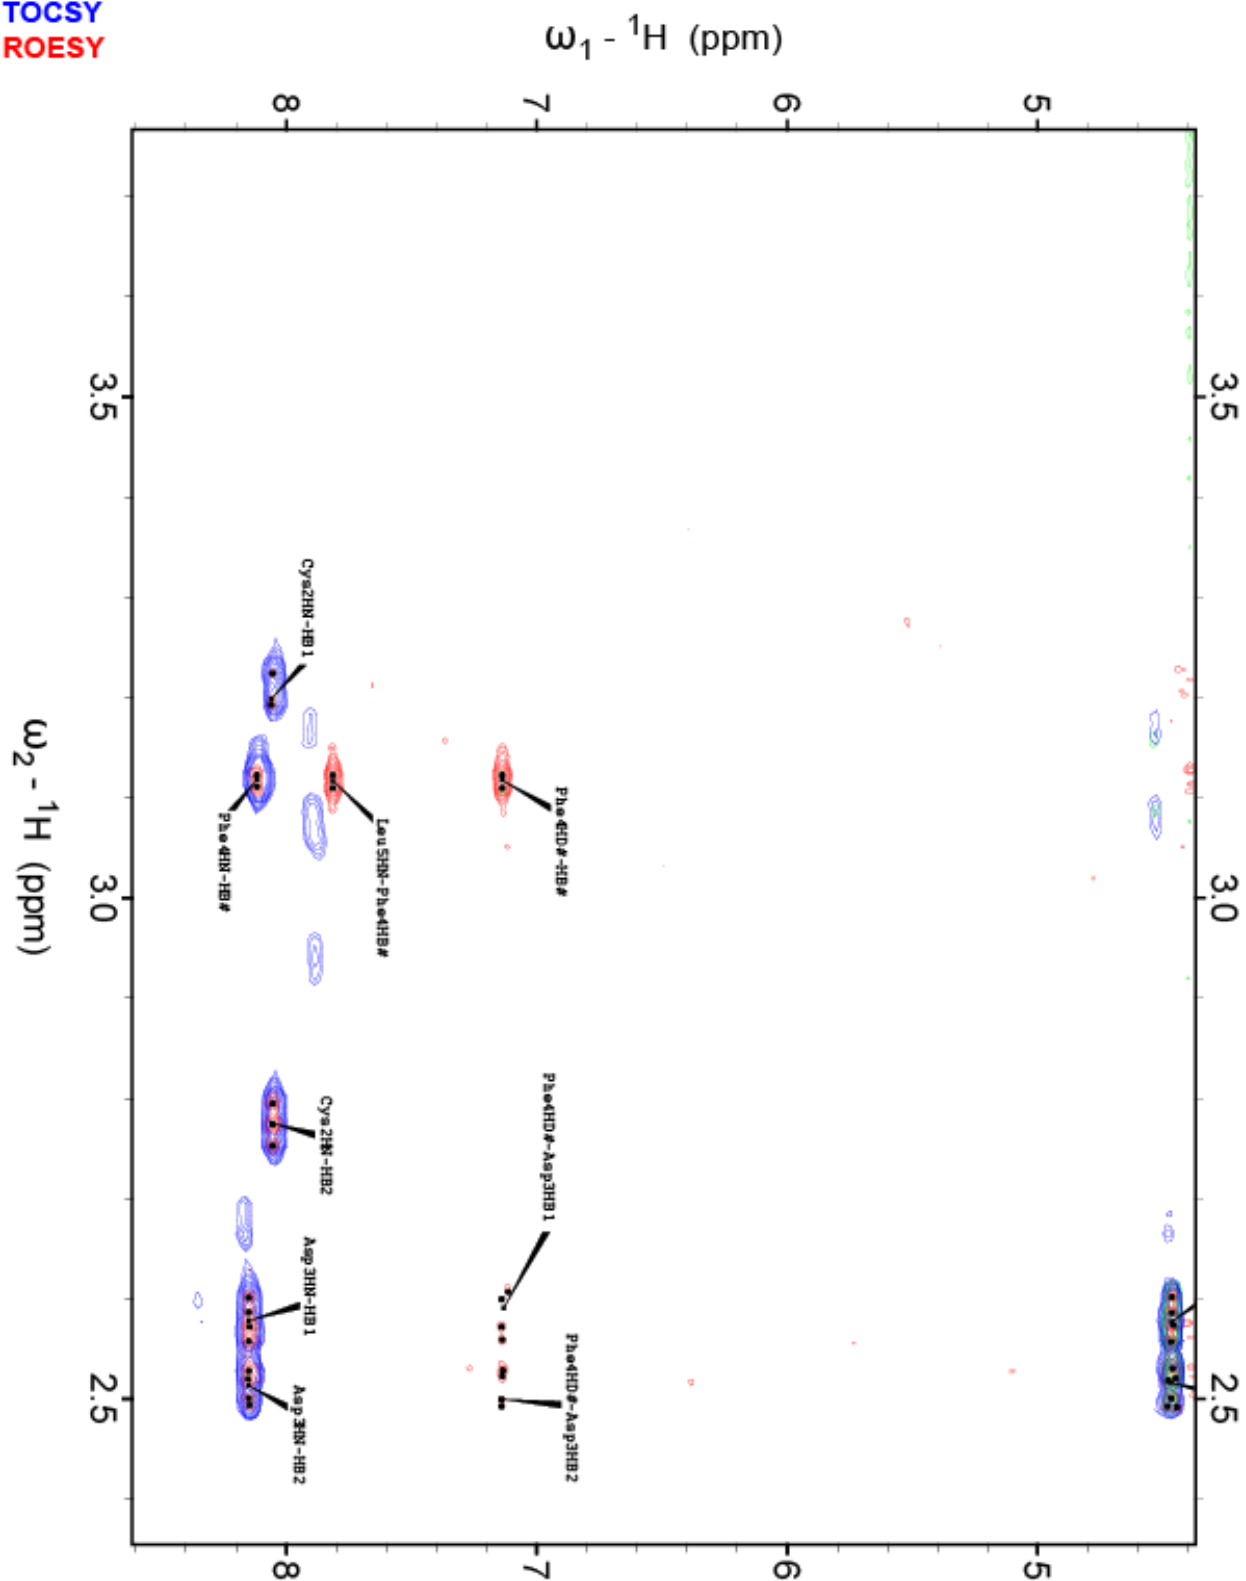

tAIP-III aliphatic region 1

COSY  
TOCSY  
ROESY

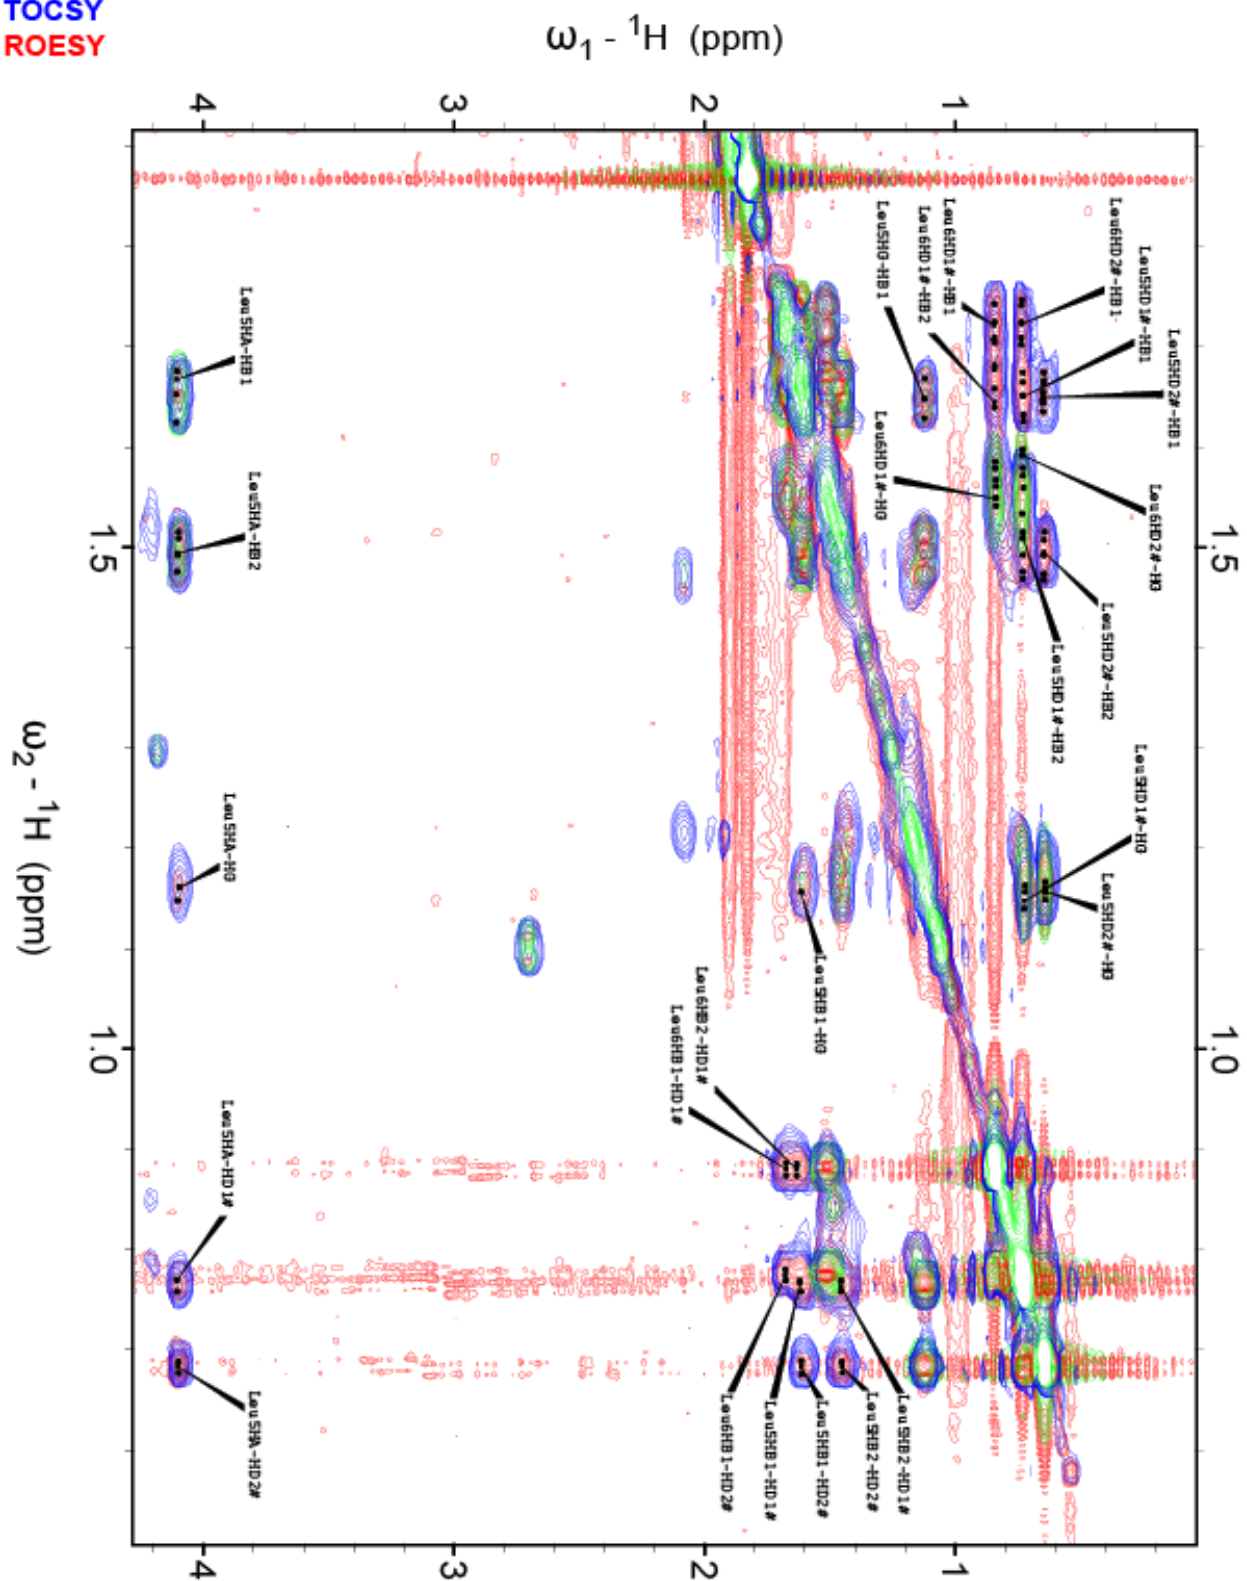

tAIP-III aliphatic region 2

COSY  
TOCSY  
ROESY

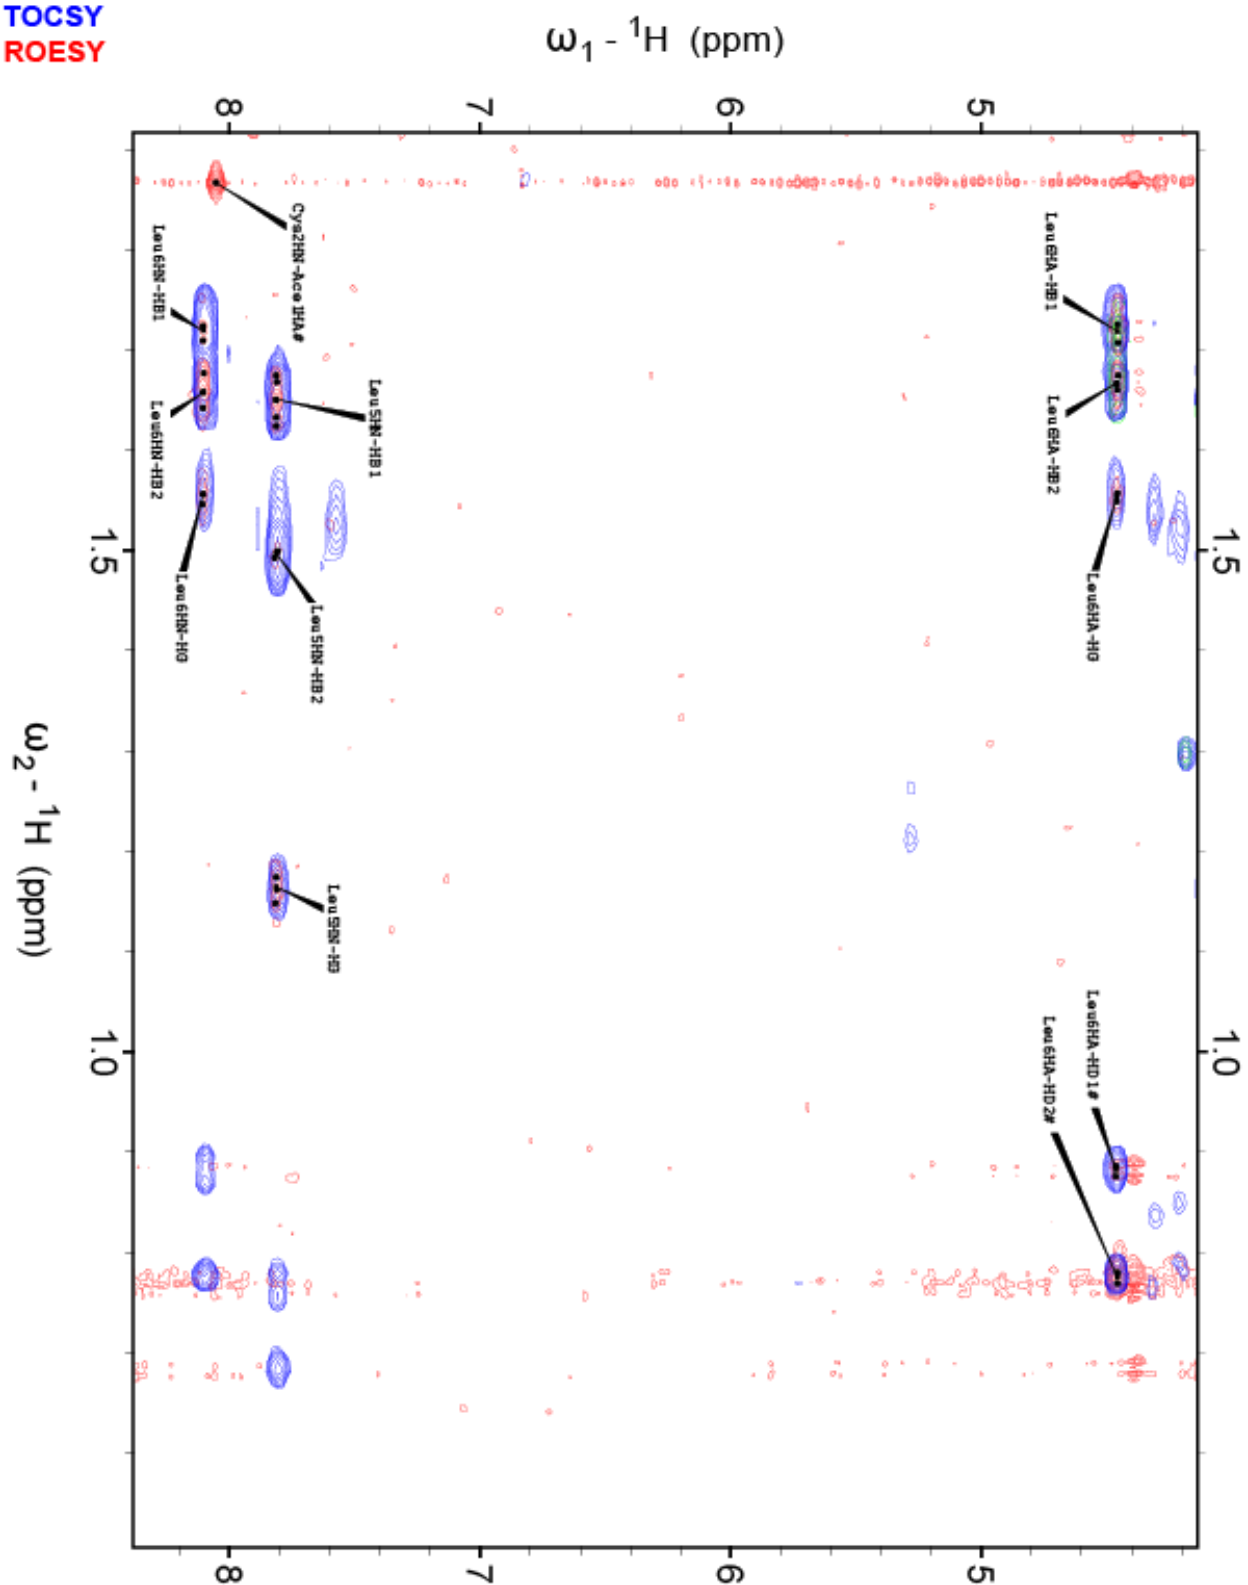



**tAIP-III D2A**  
1-D spectrum

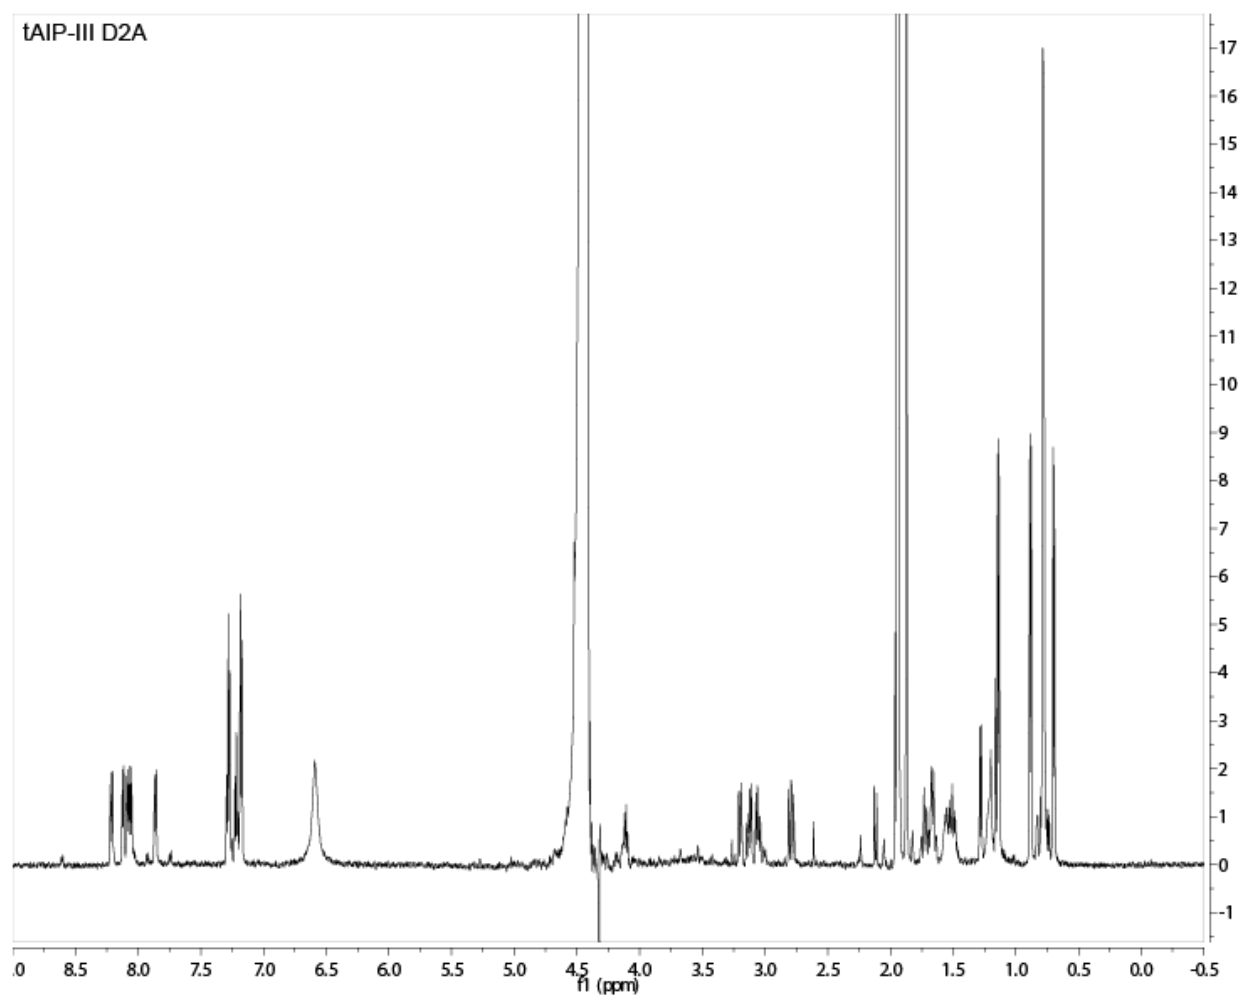

tAIP-III D2A fingerprint region 1

COSY  
TOCSY  
ROESY

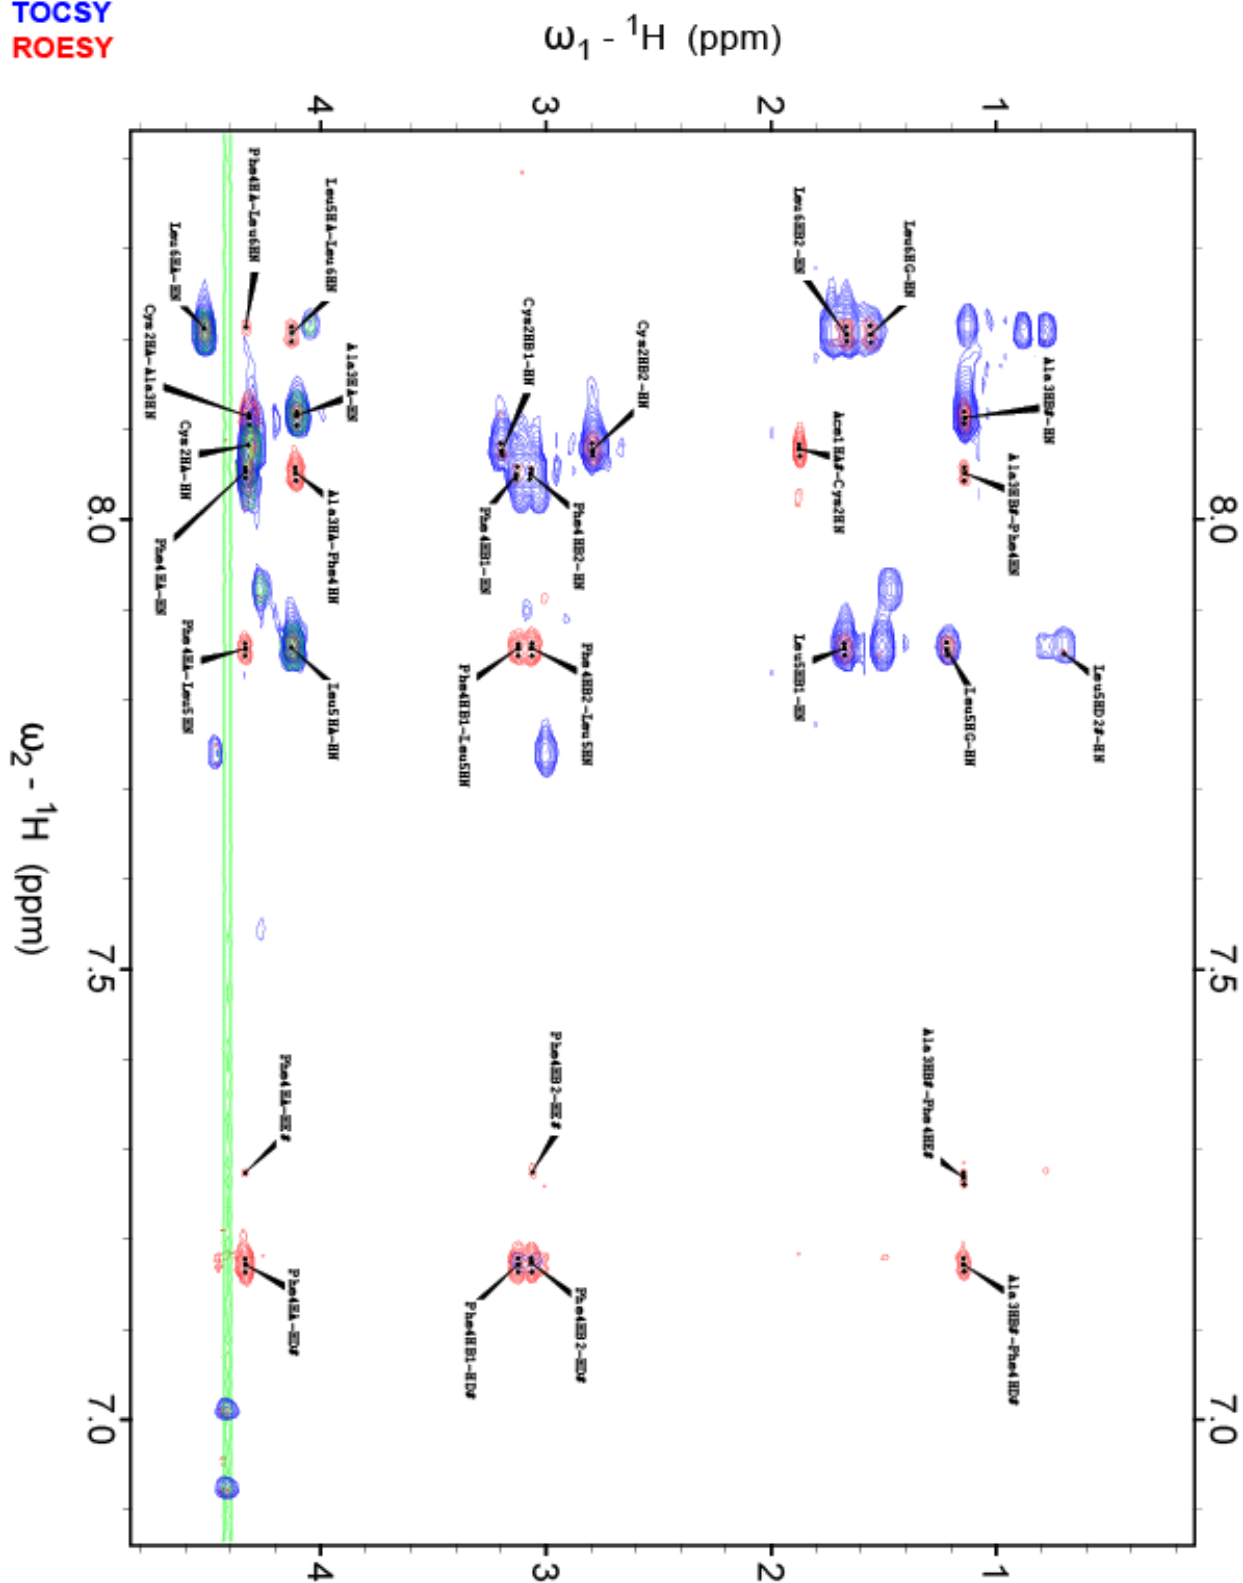

tAIP-III D2A fingerprint region 2

COSY  
TOCSY  
ROESY

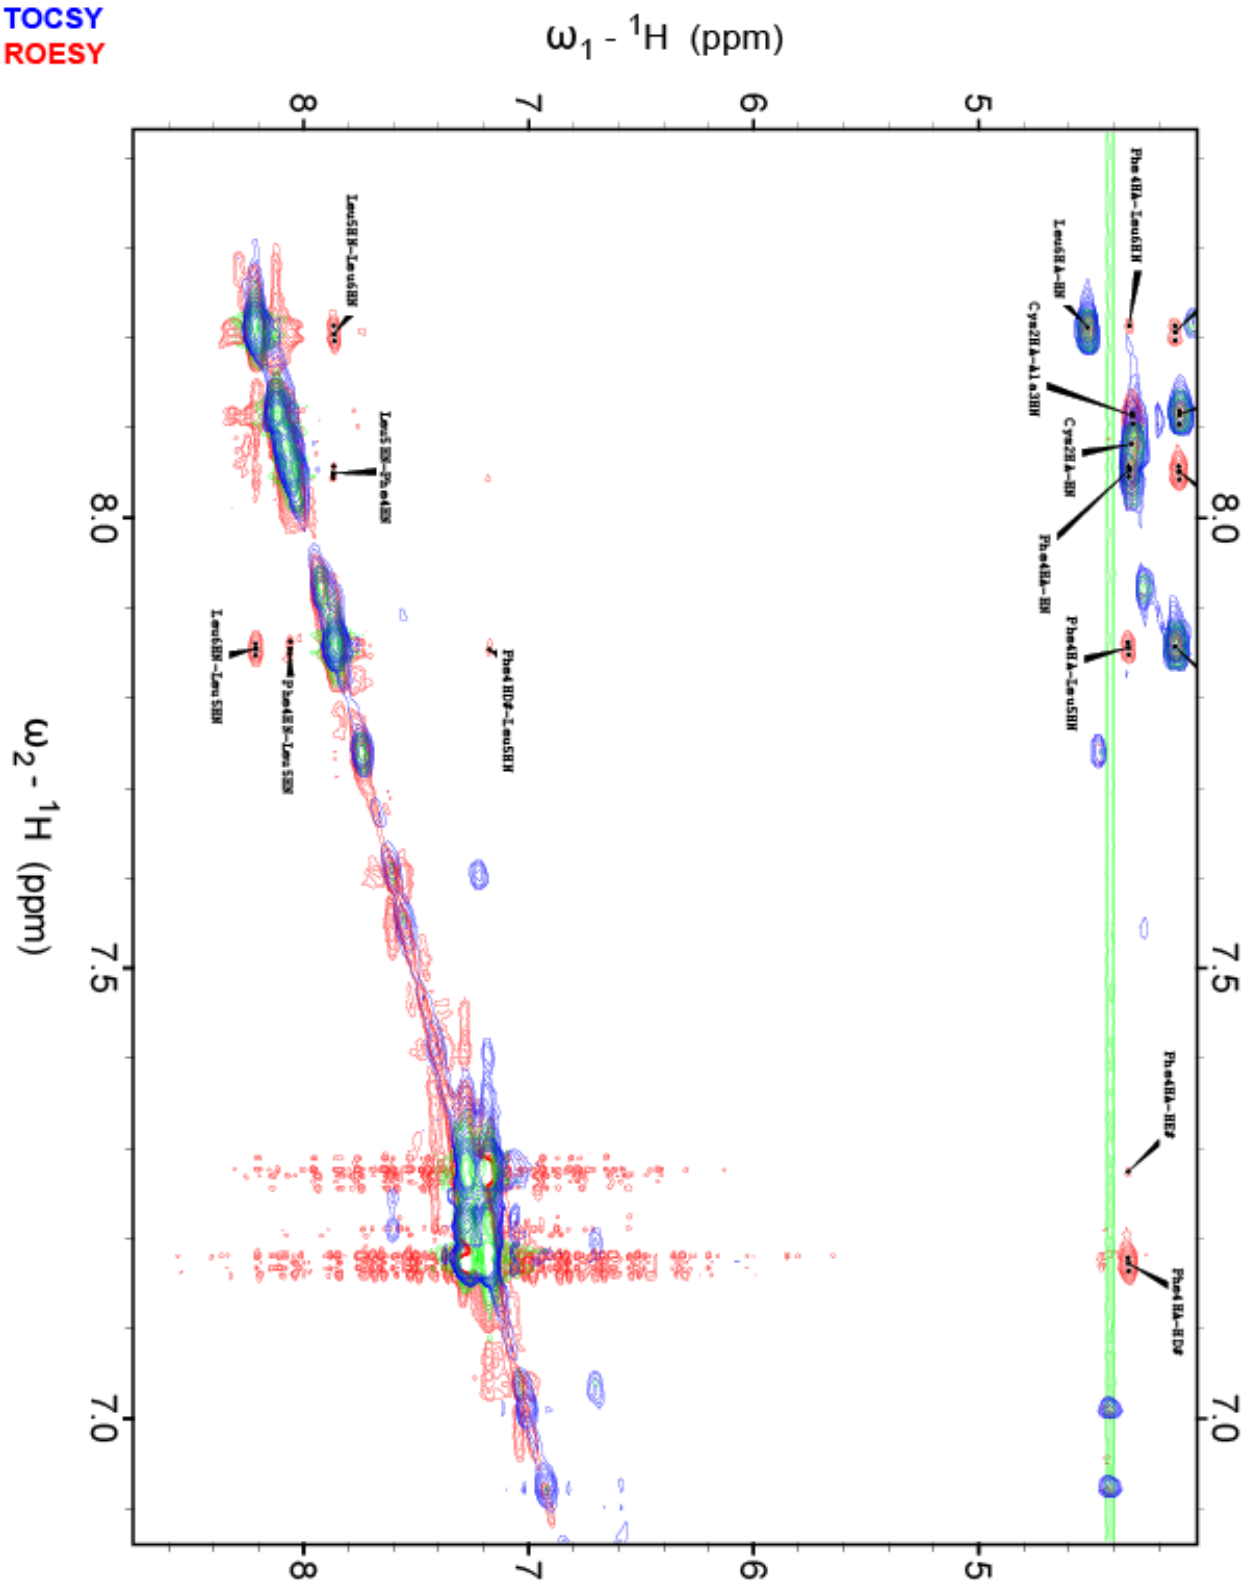

tAIP-III D2A C-alpha region 1

COSY  
TOCSY  
ROESY

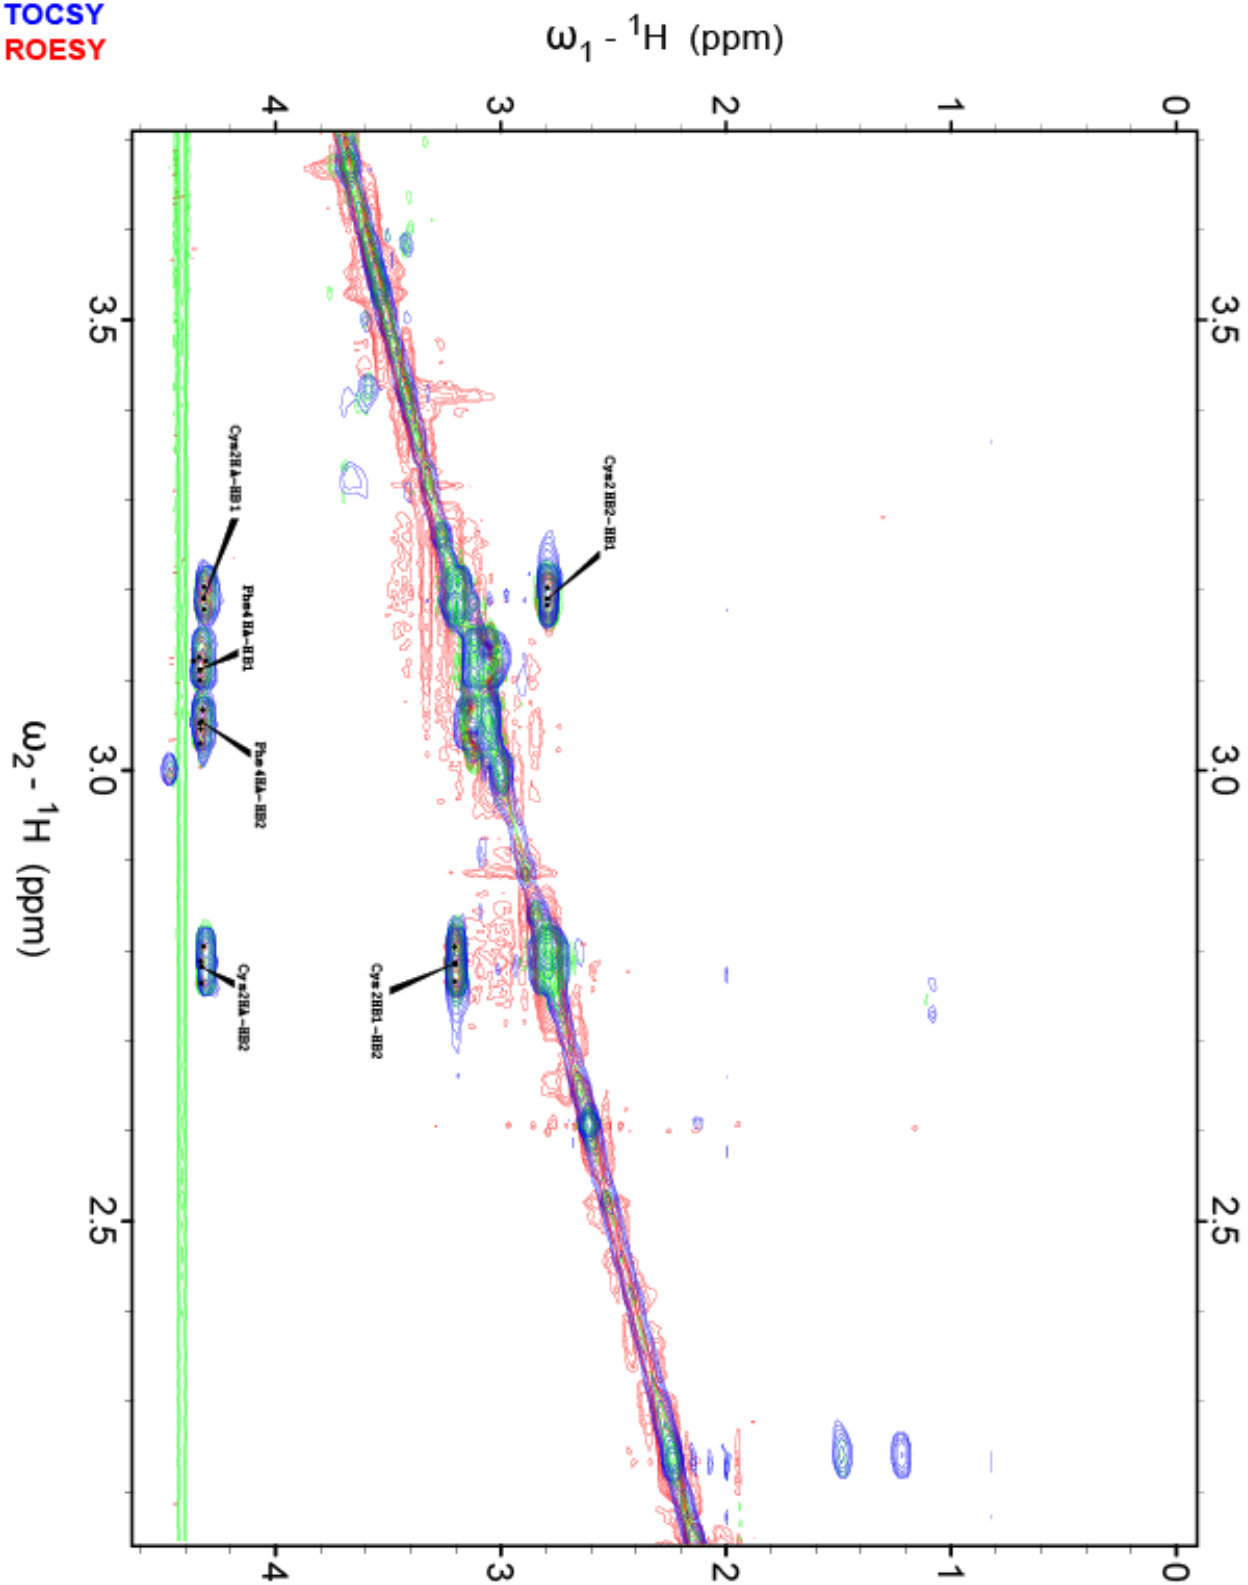

tAIP-III D2A C-alpha region 2

COSY  
TOCSY  
ROESY

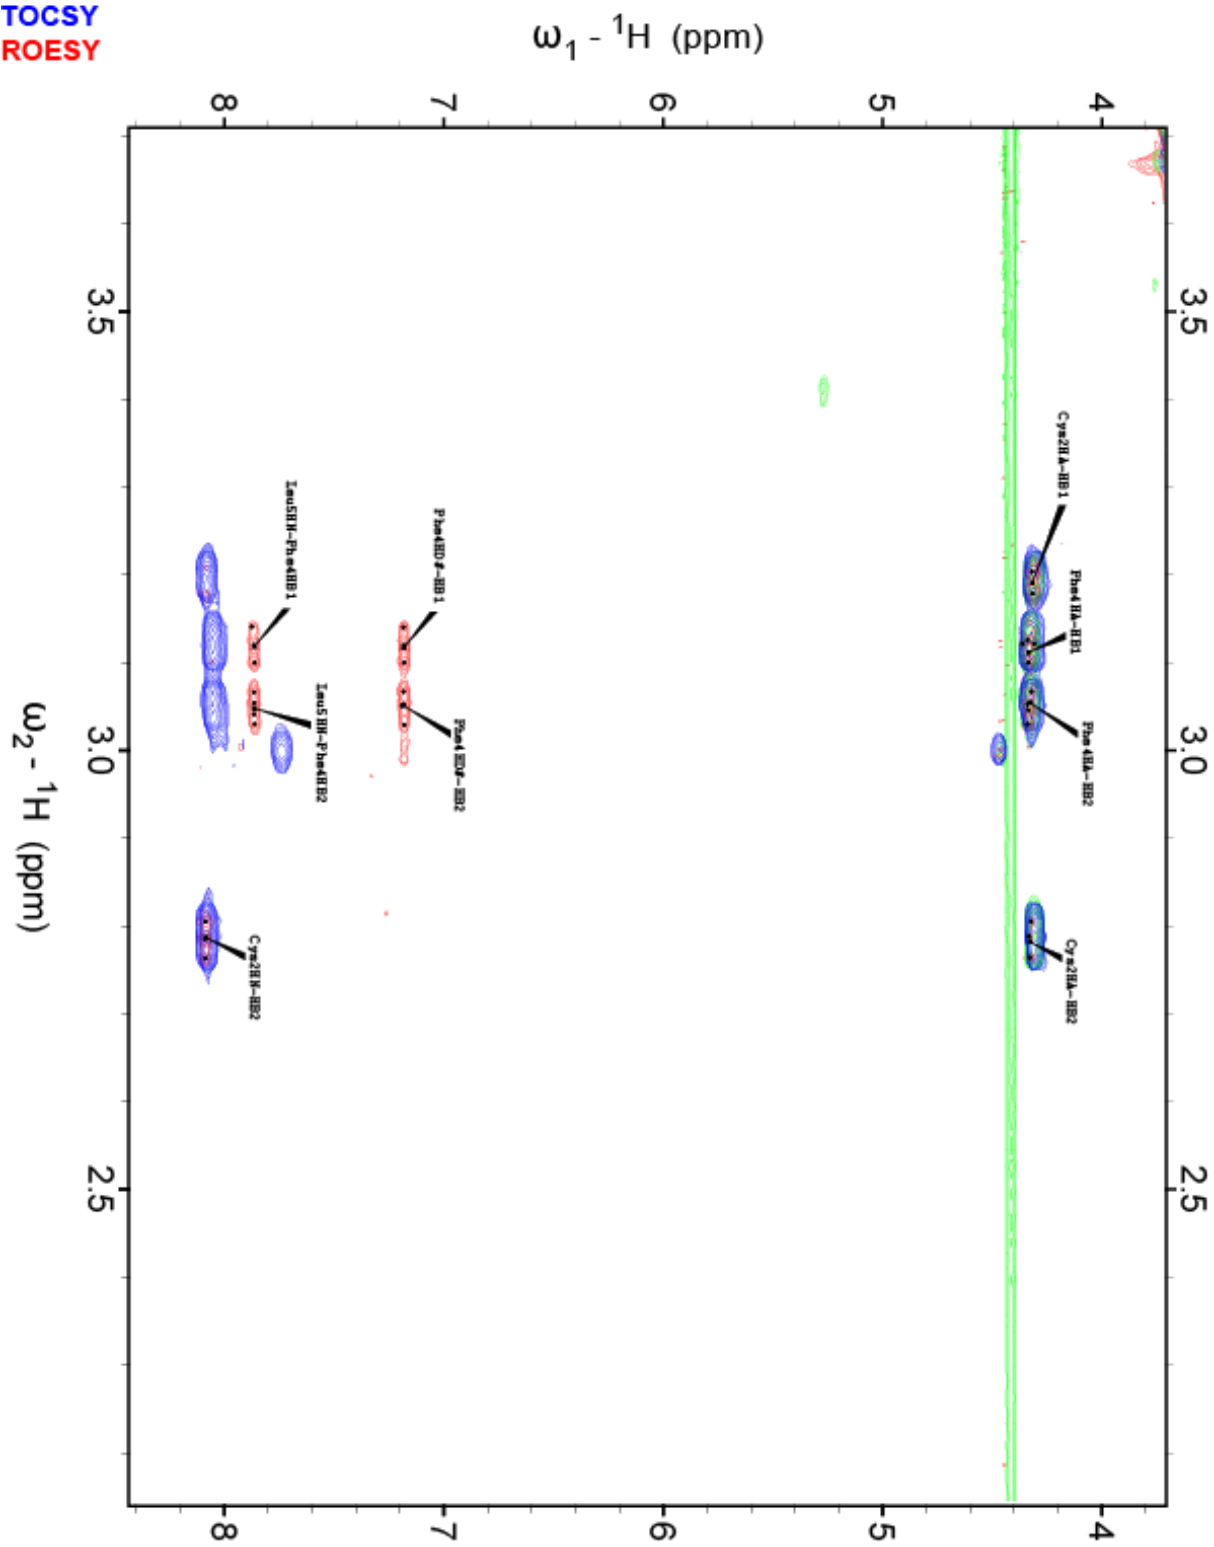





**AIP-III D-F5**  
1-D spectrum

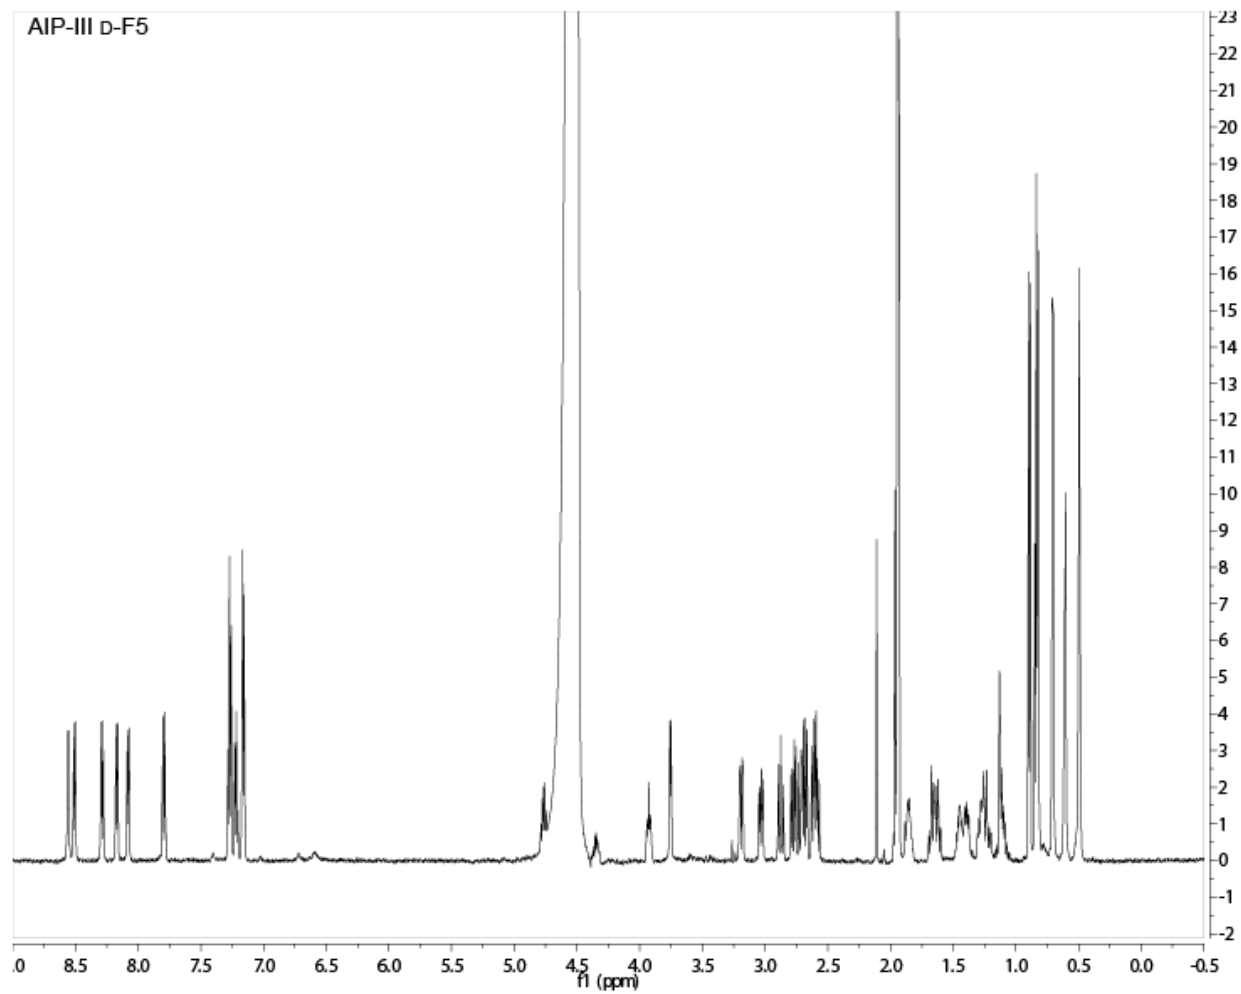









### AIP-III D-F5 C-alpha region 2

COSY  
TOCSY  
ROESY

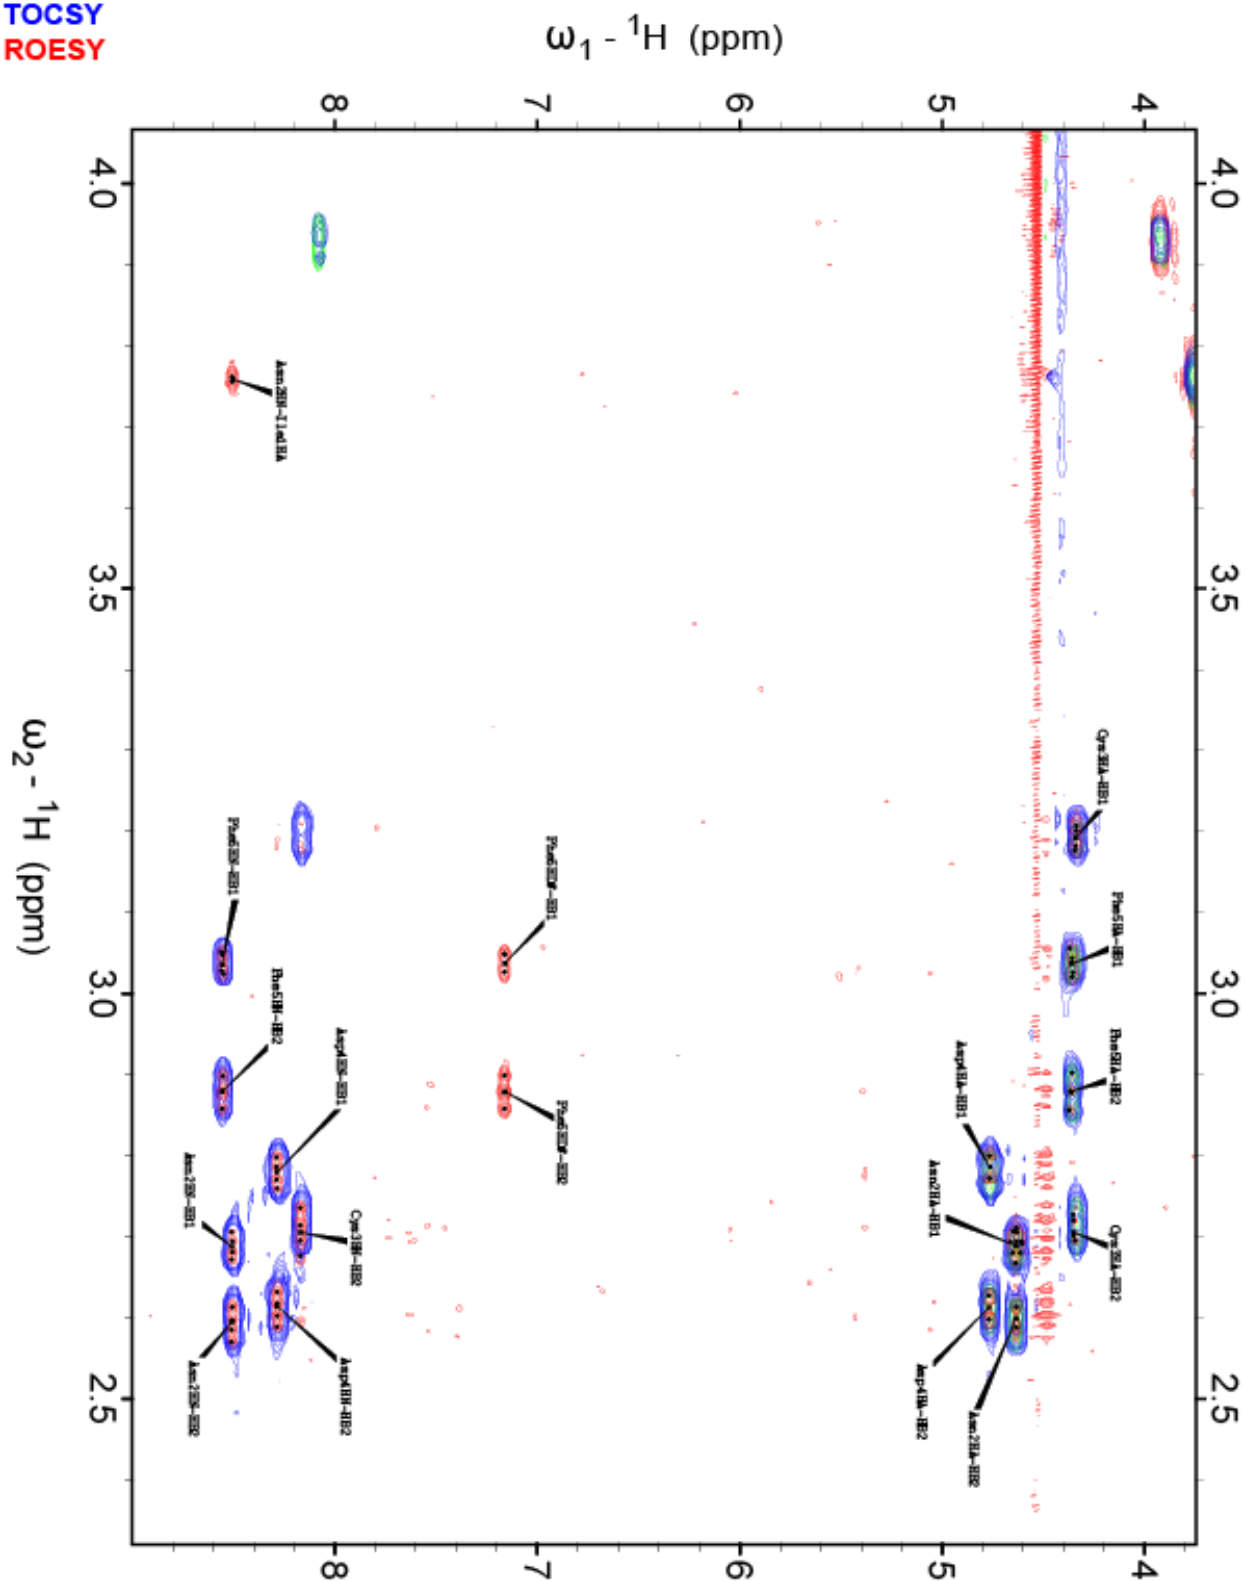





**AIP-III D-L7**  
1-D spectrum

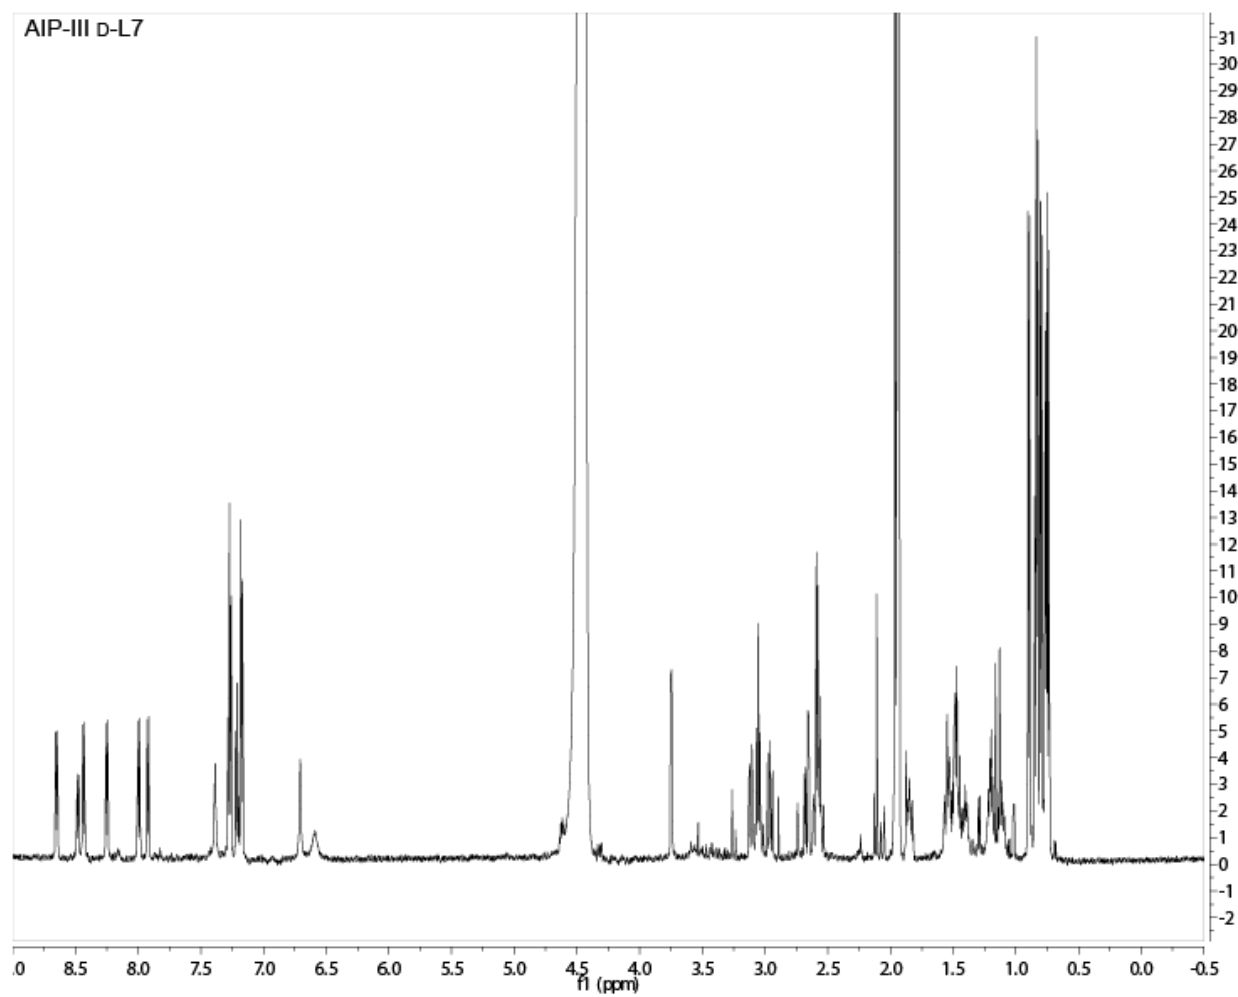

AIP-III D-L7 fingerprint region 1

COSY  
TOCSY  
ROESY

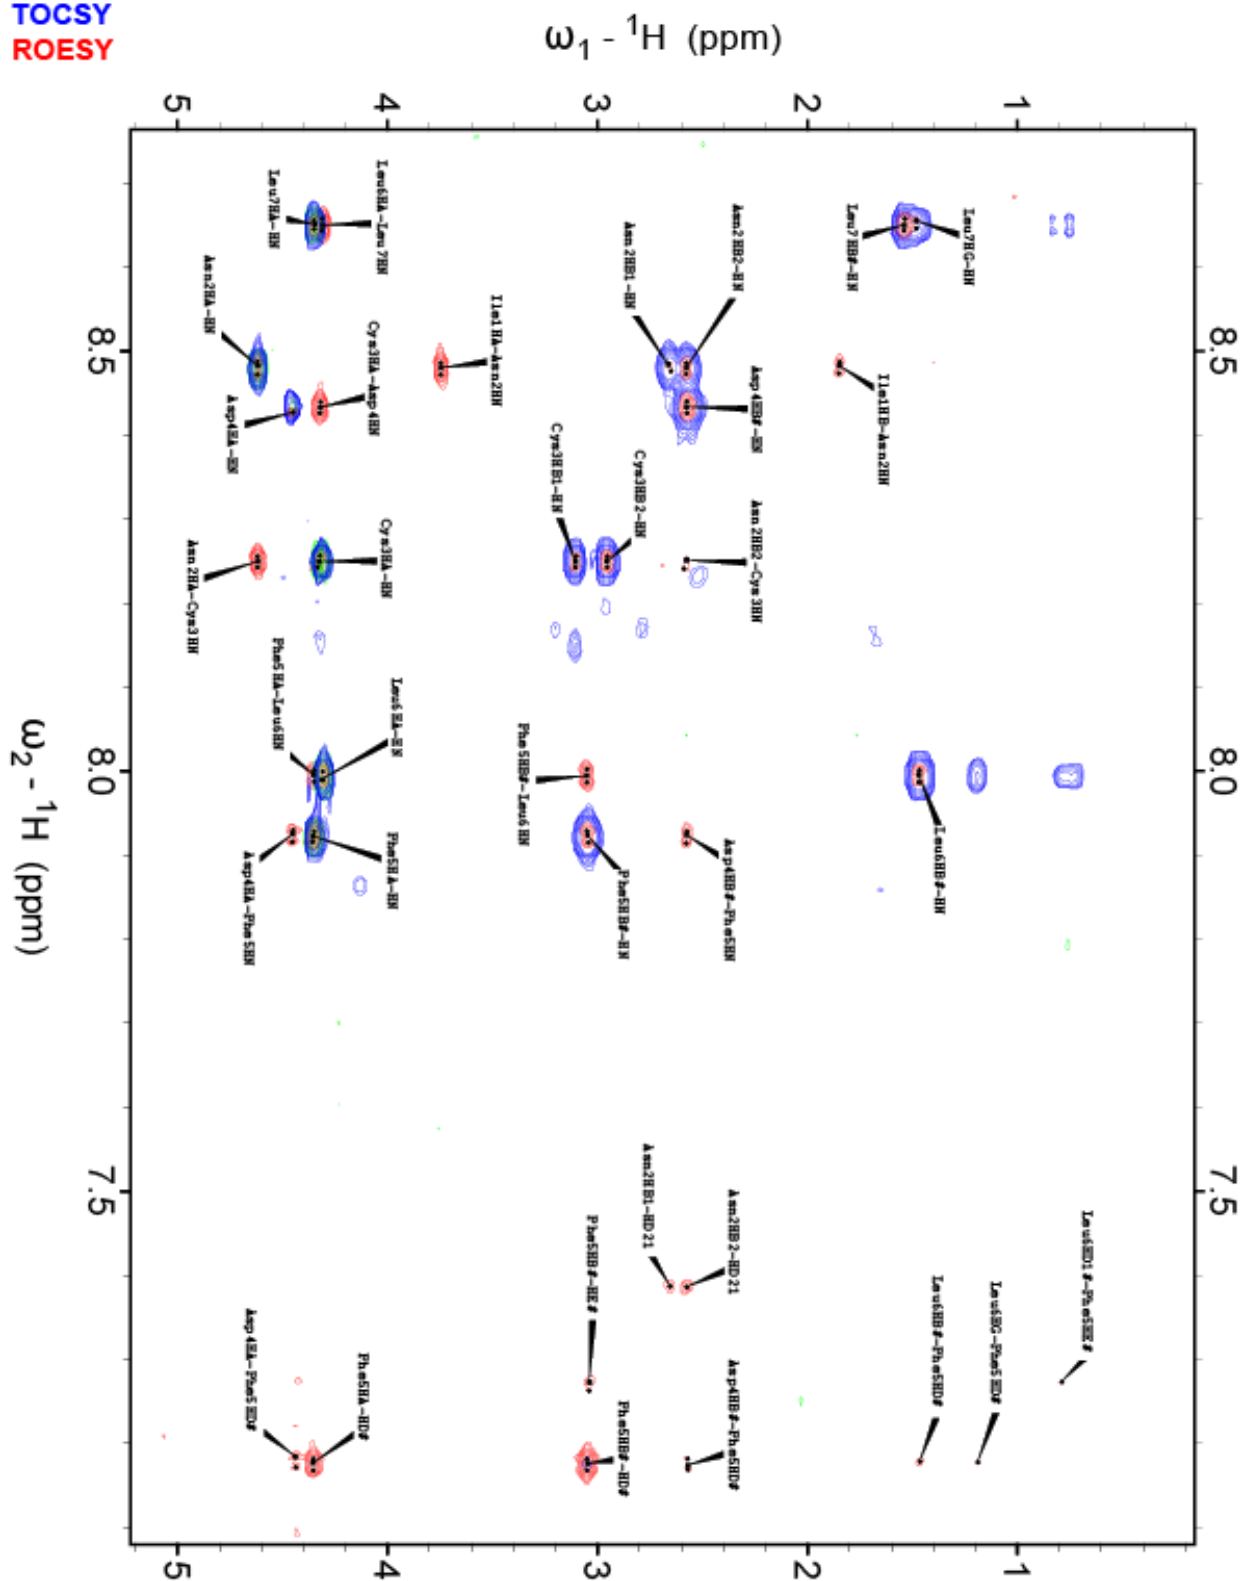



AIP-III D-L7 fingerprint region 2

COSY  
TOCSY  
ROESY

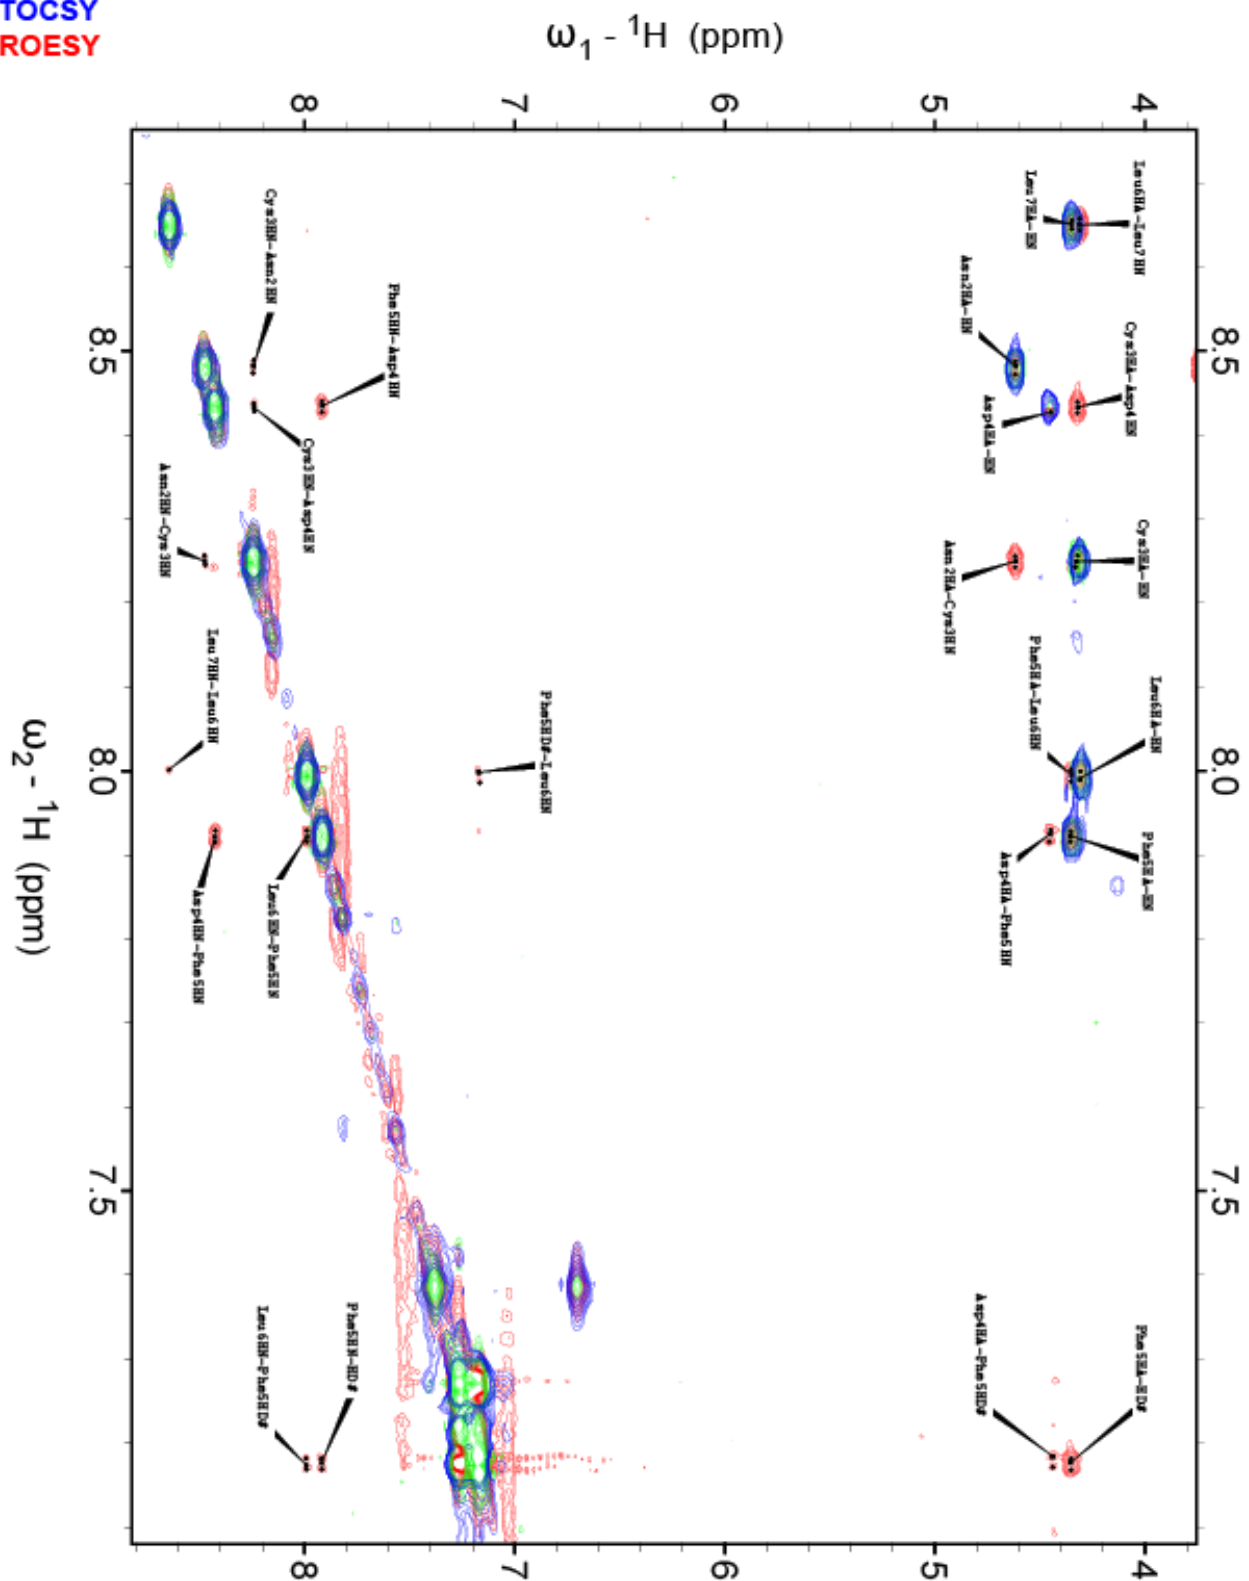

AIP-III D-L7 C-alpha region 1

COSY  
TOCSY  
ROESY

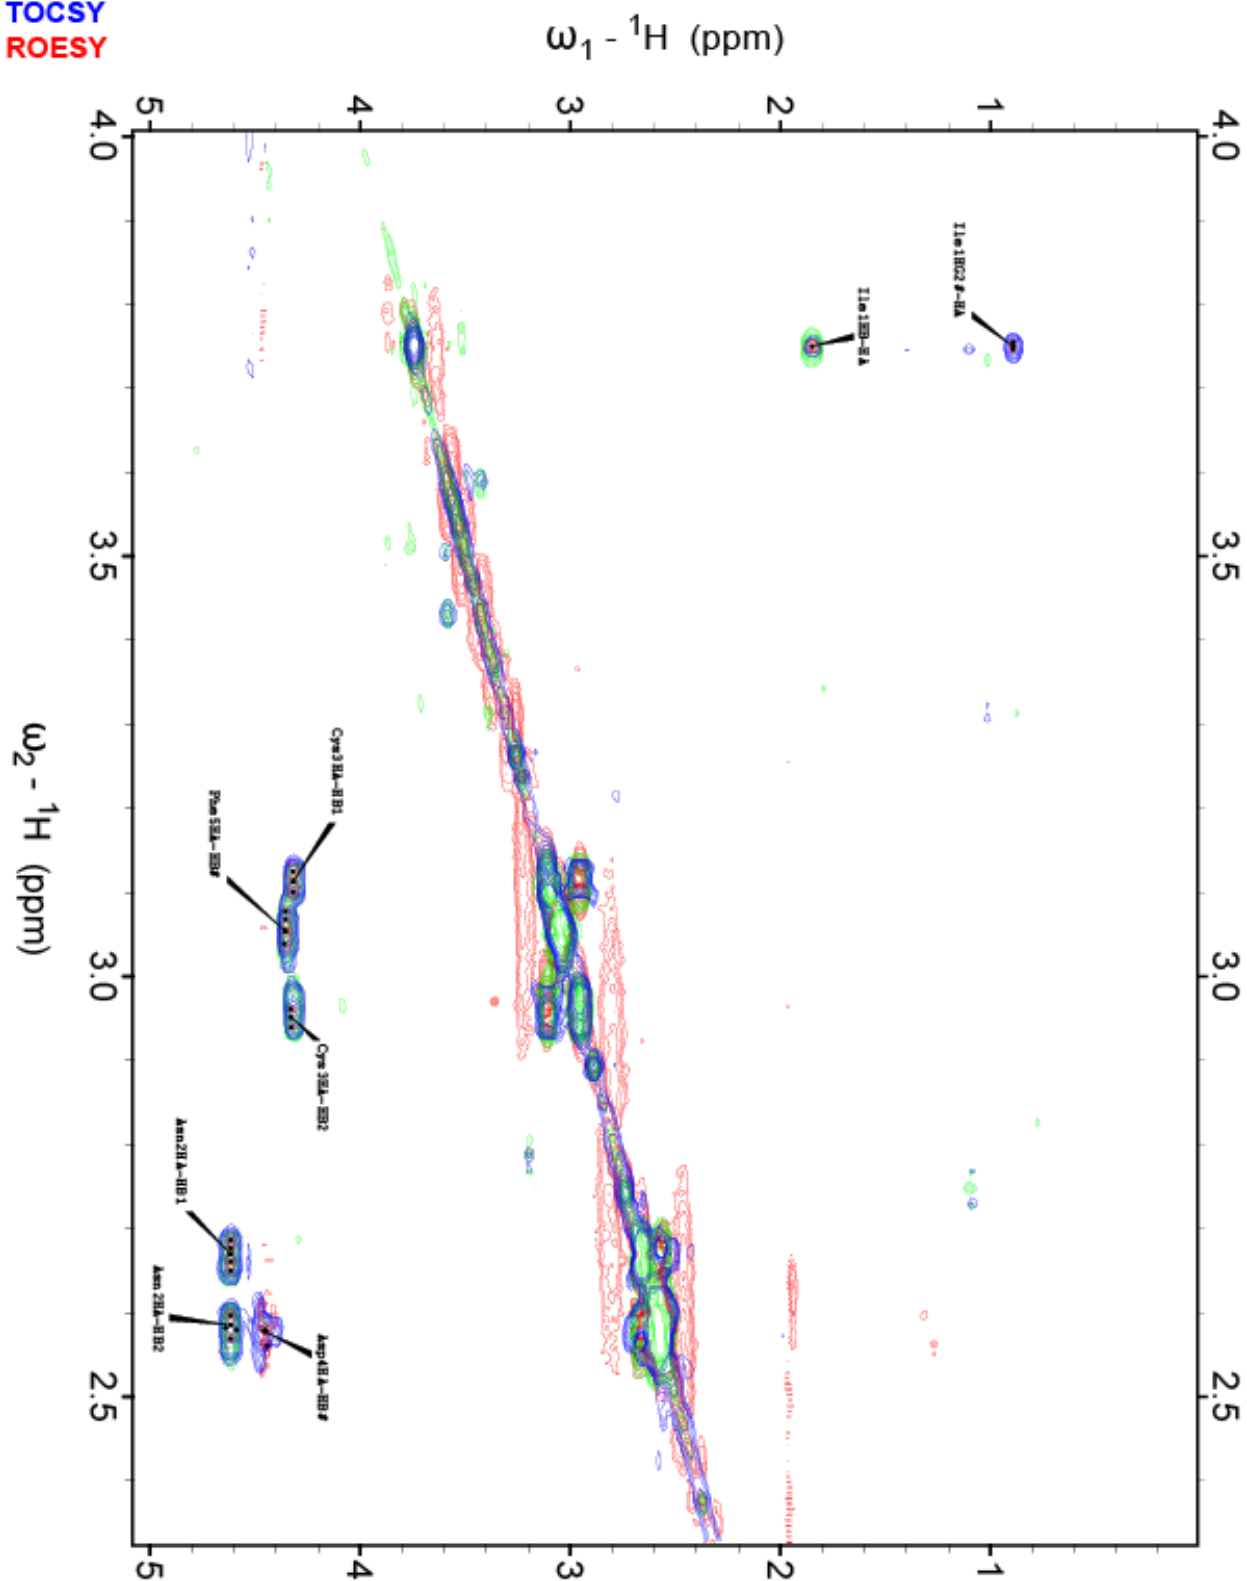

### AIP-III D-L7 C-alpha region 2

COSY  
TOCSY  
ROESY

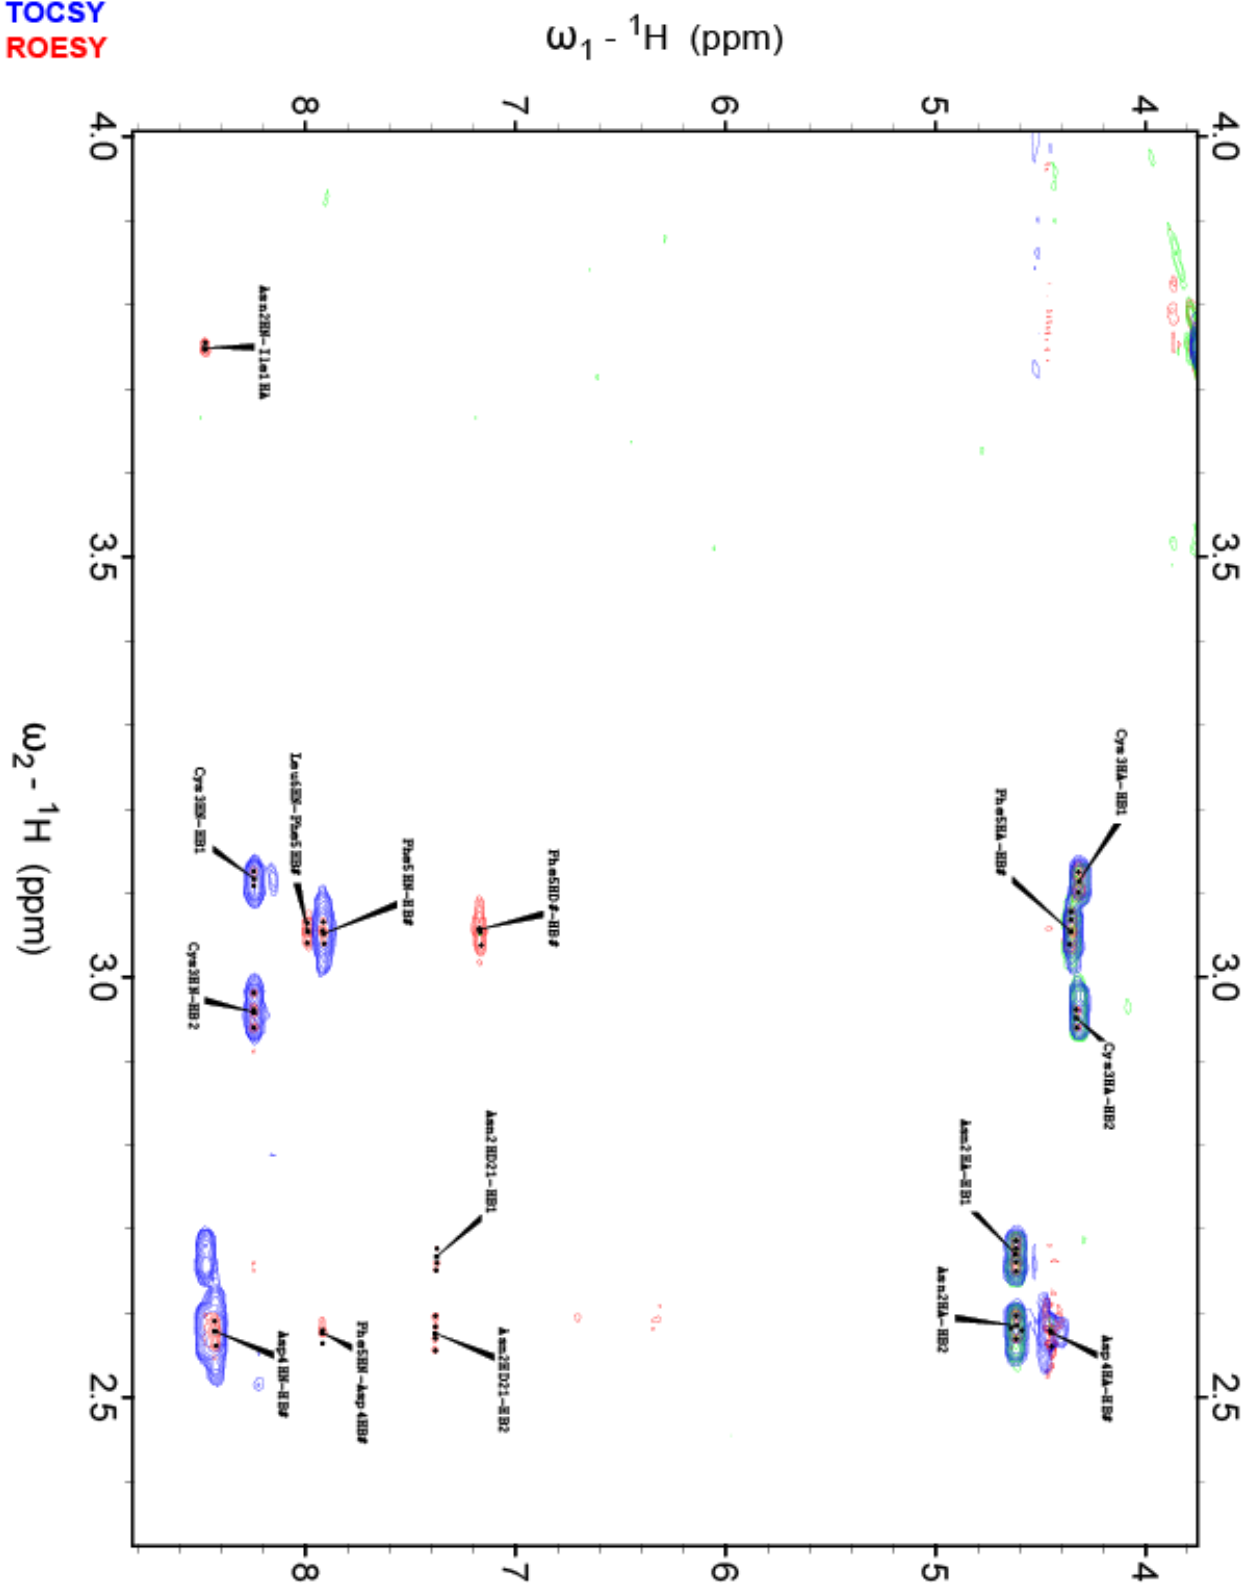



AIP-III D-L7 aliphatic region 2

COSY  
TOCSY  
ROESY

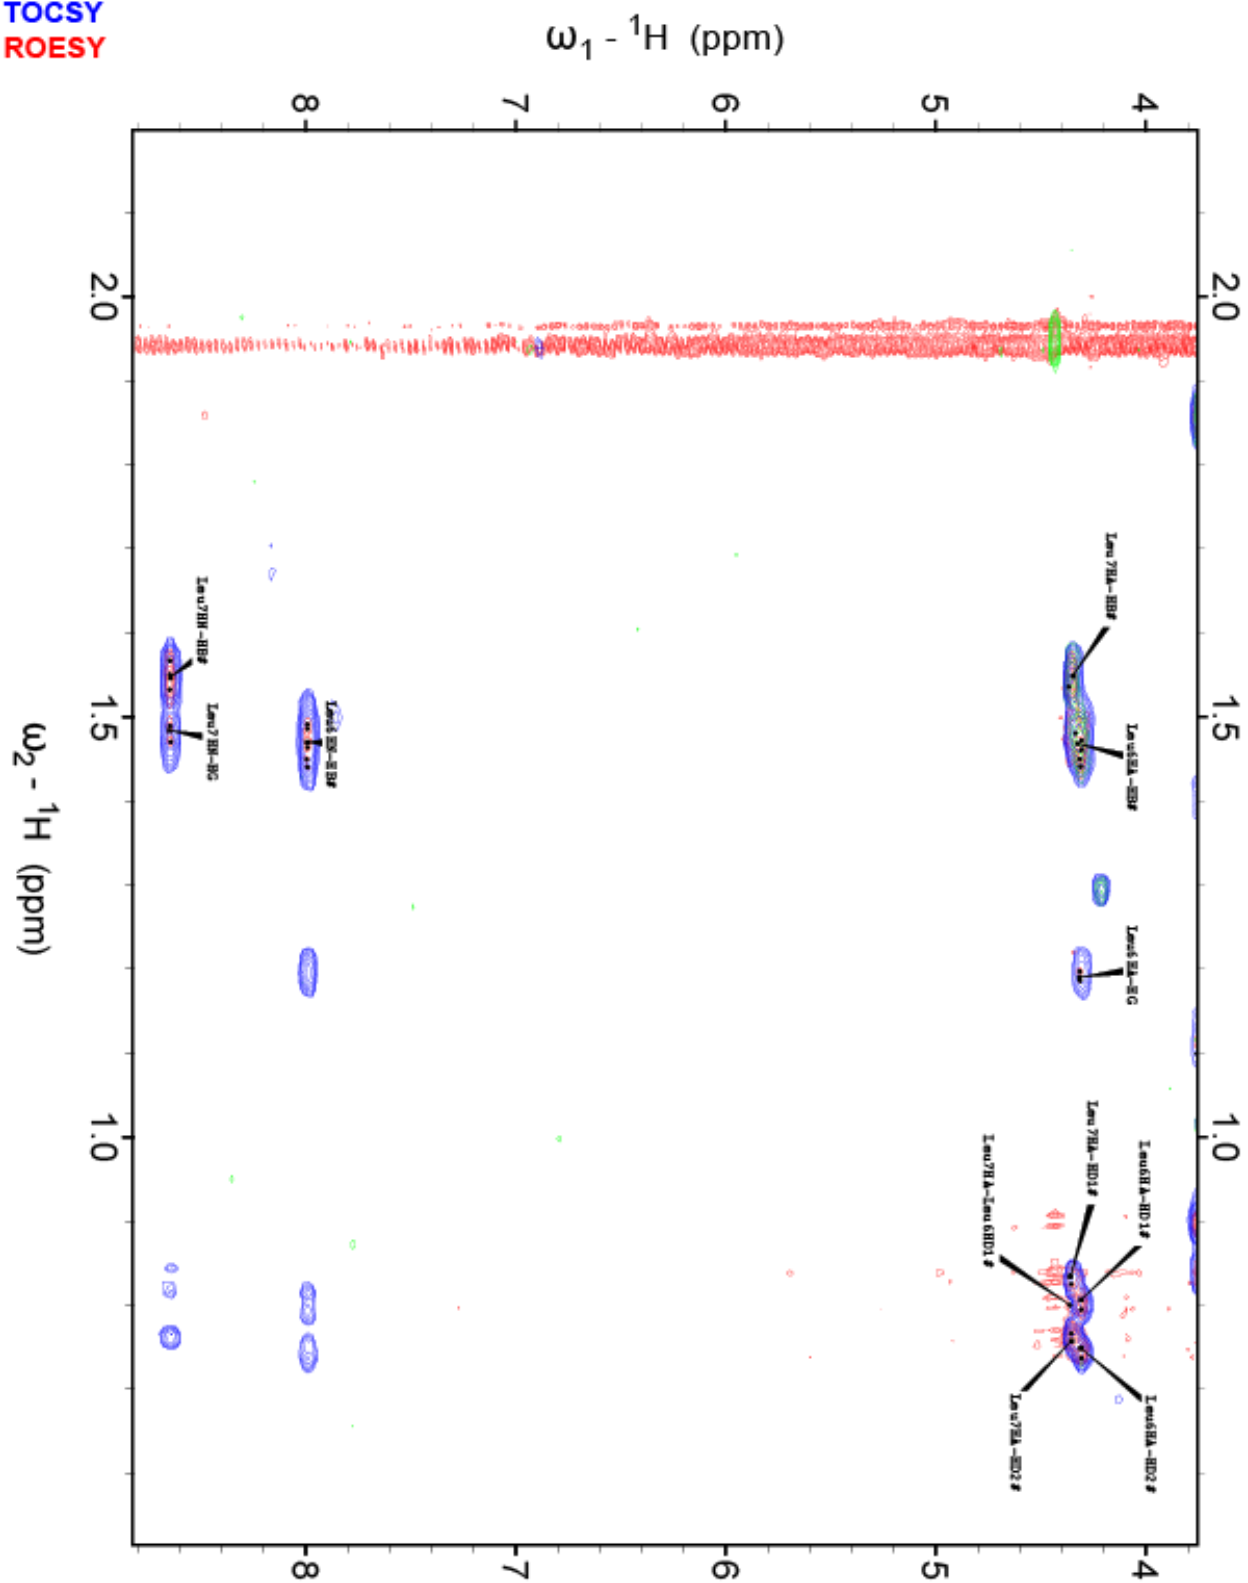

**AIP-III F5A**  
1-D spectrum

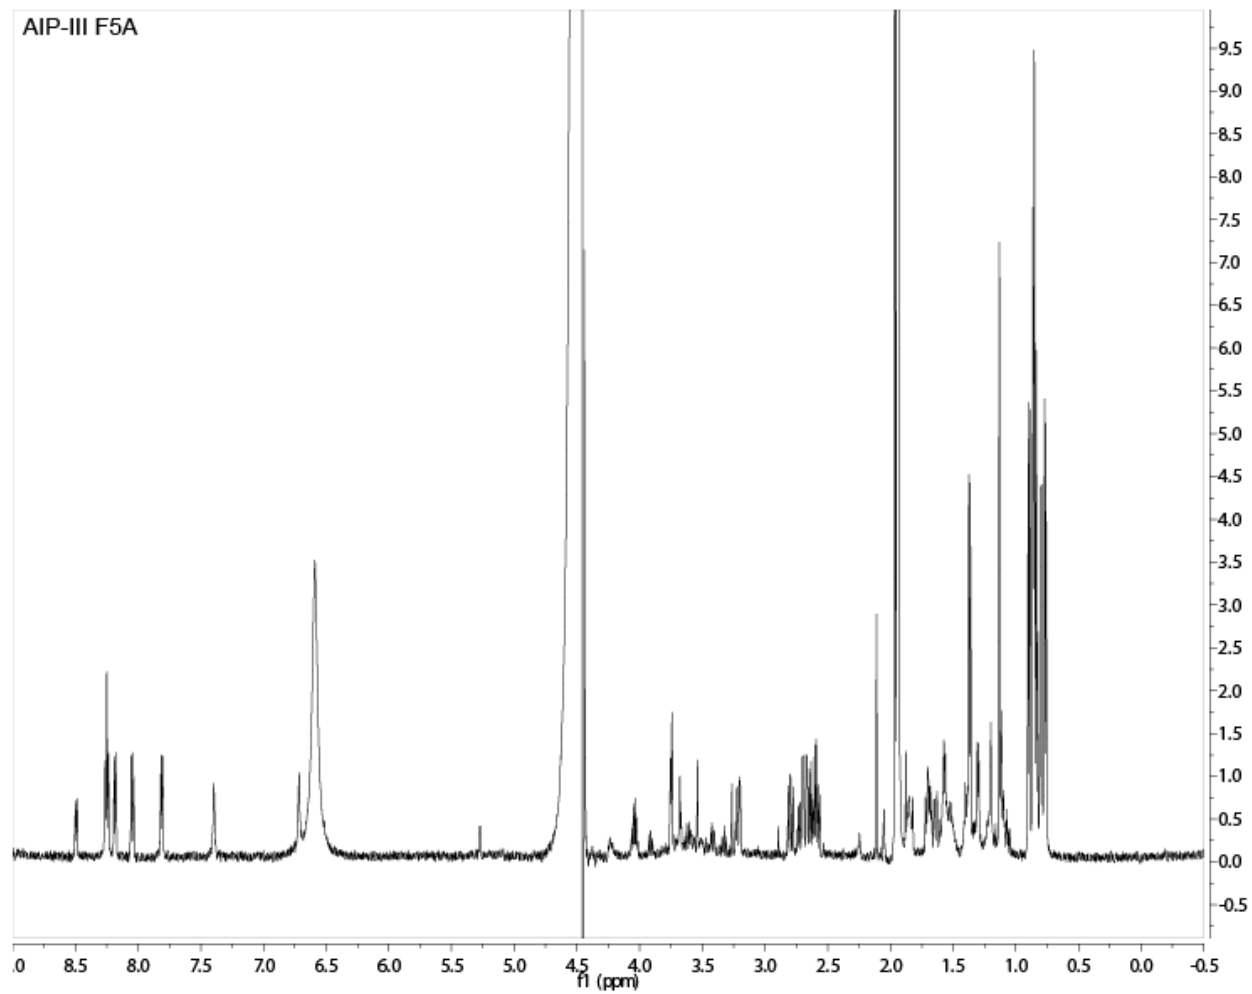



AIP-III F5A fingerprint region 2

COSY  
TOCSY  
ROESY

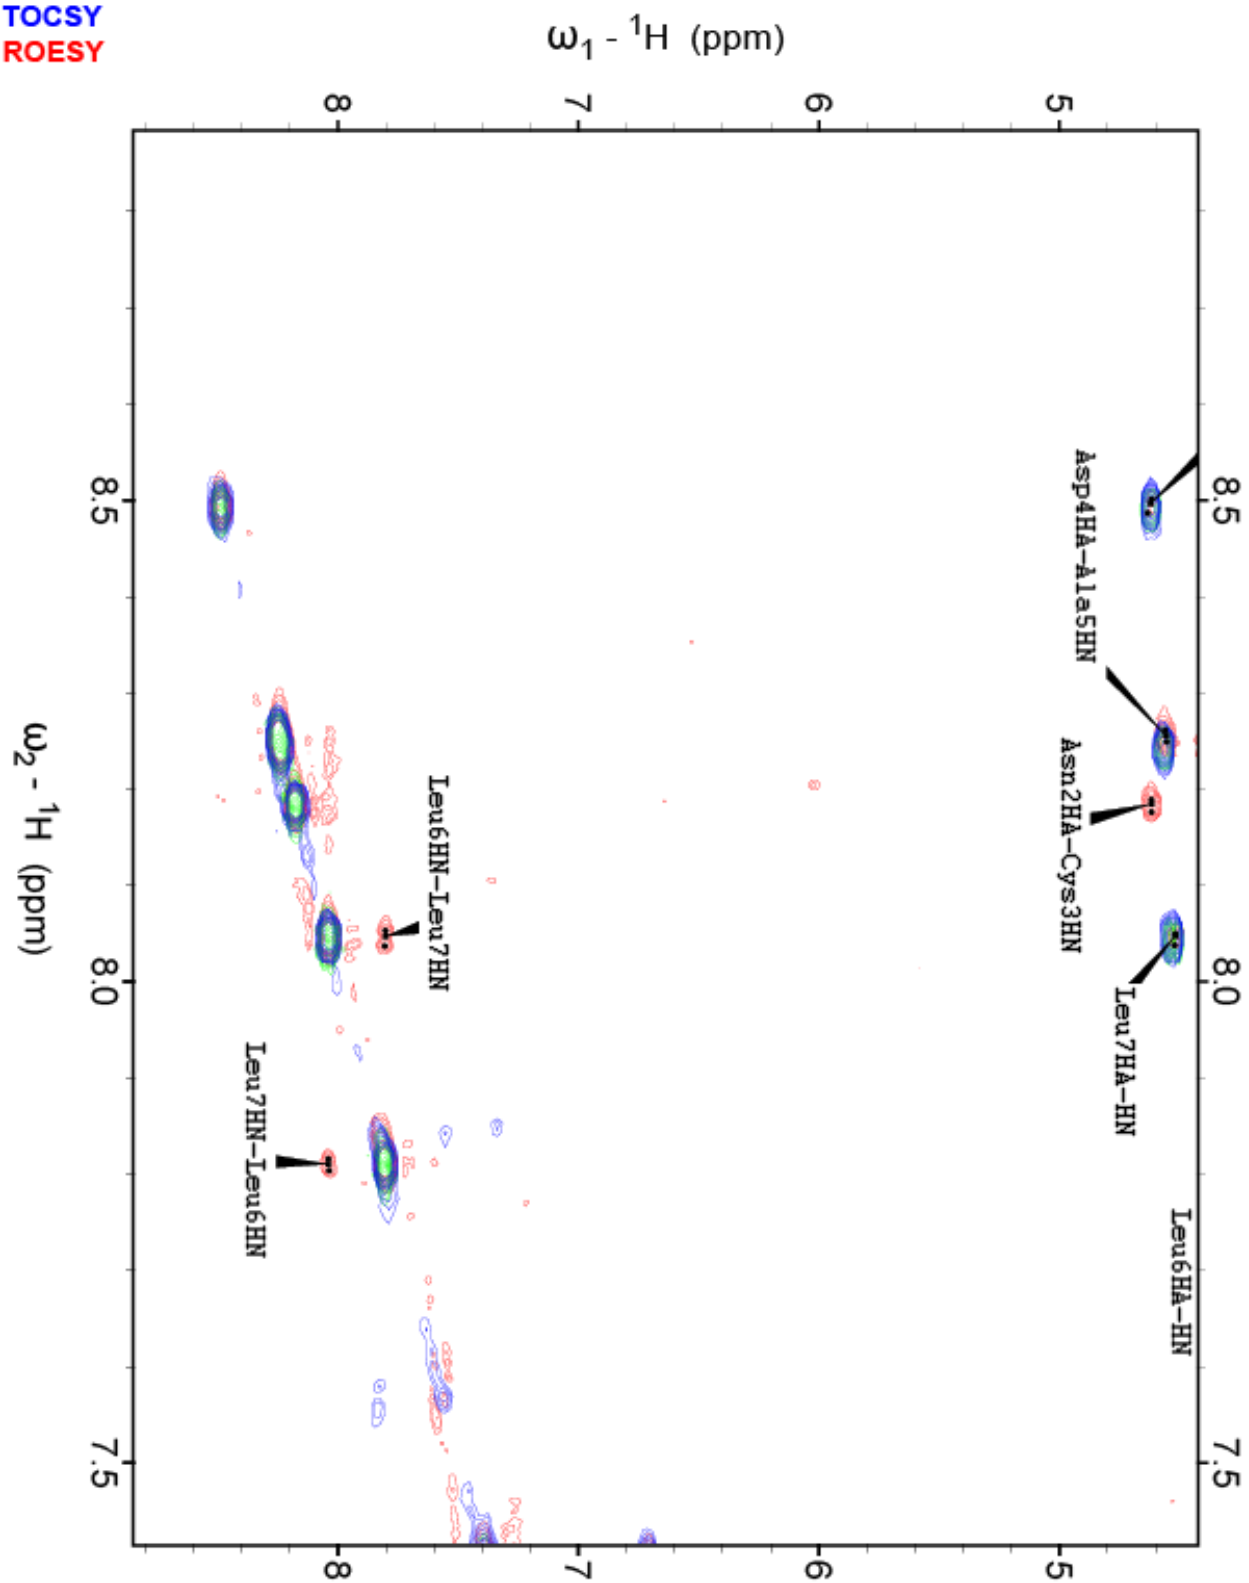



AIP-III F5A C-alpha region 1

COSY  
TOCSY  
ROESY

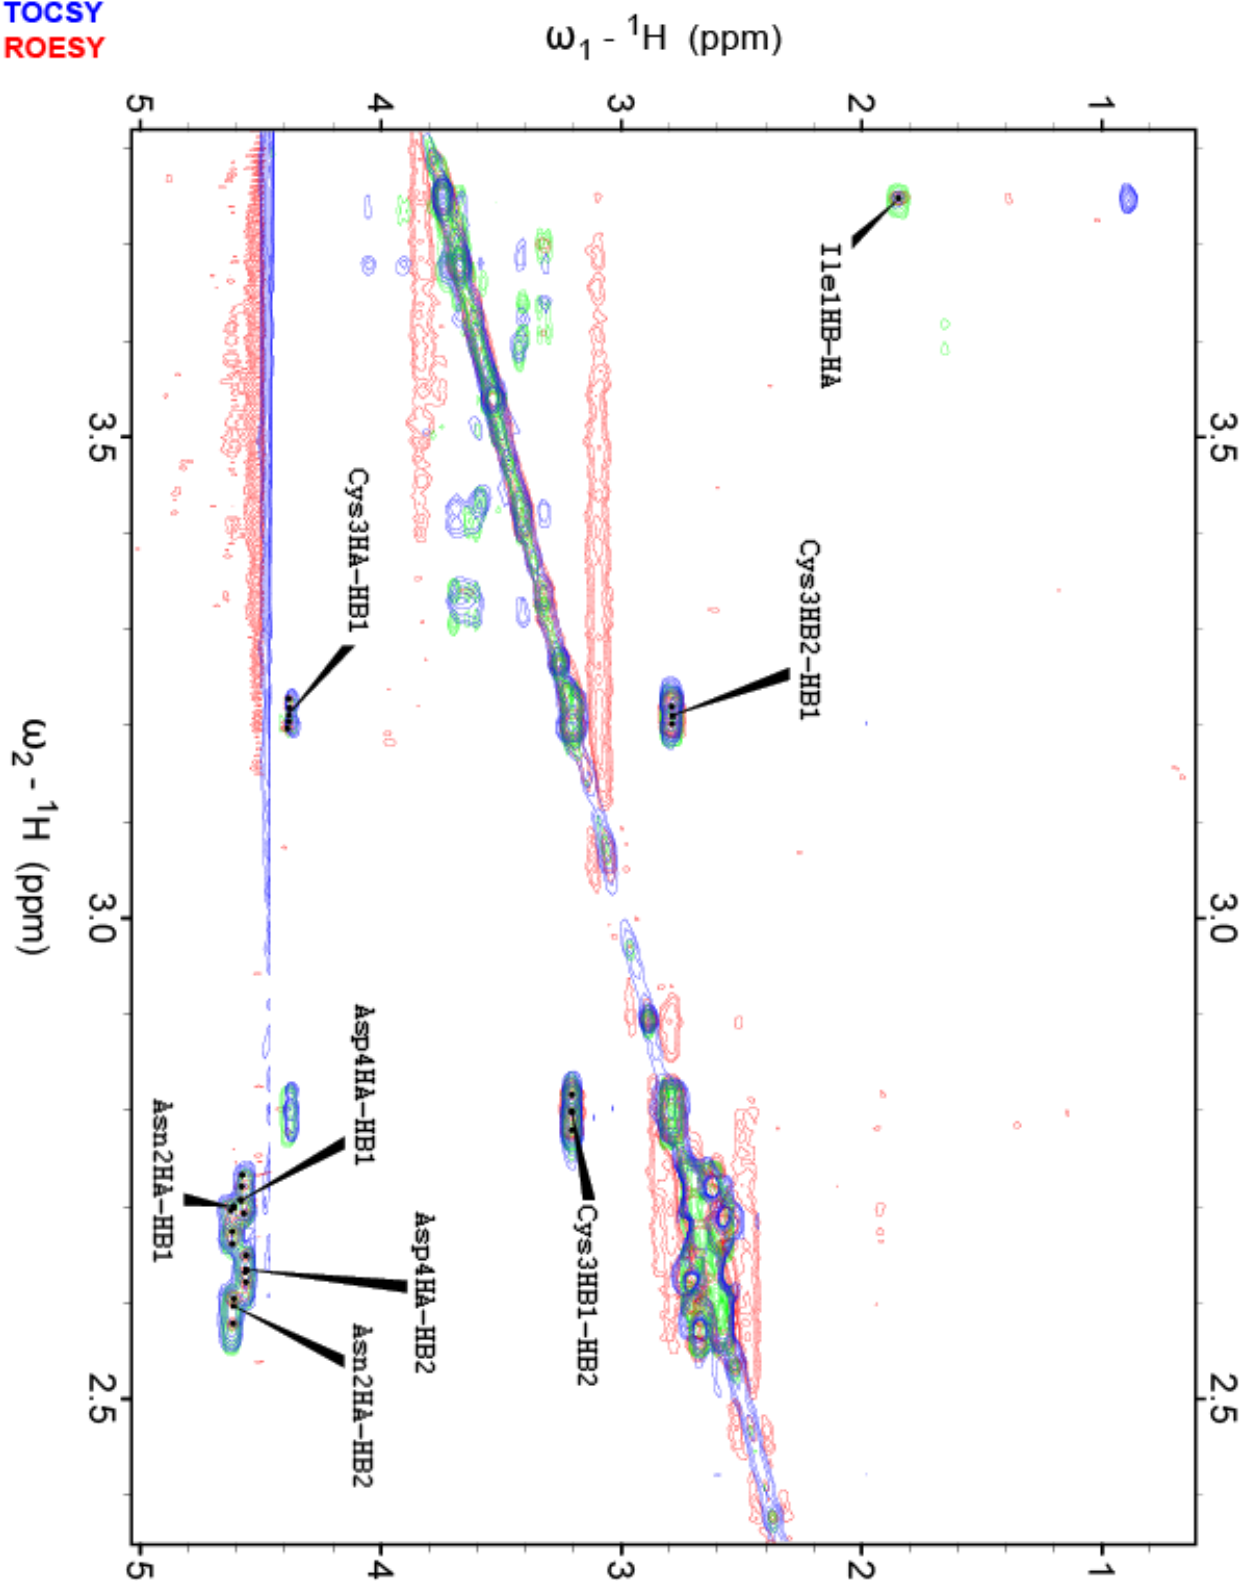

AIP-III F5A C-alpha region 2

COSY  
TOCSY  
ROESY

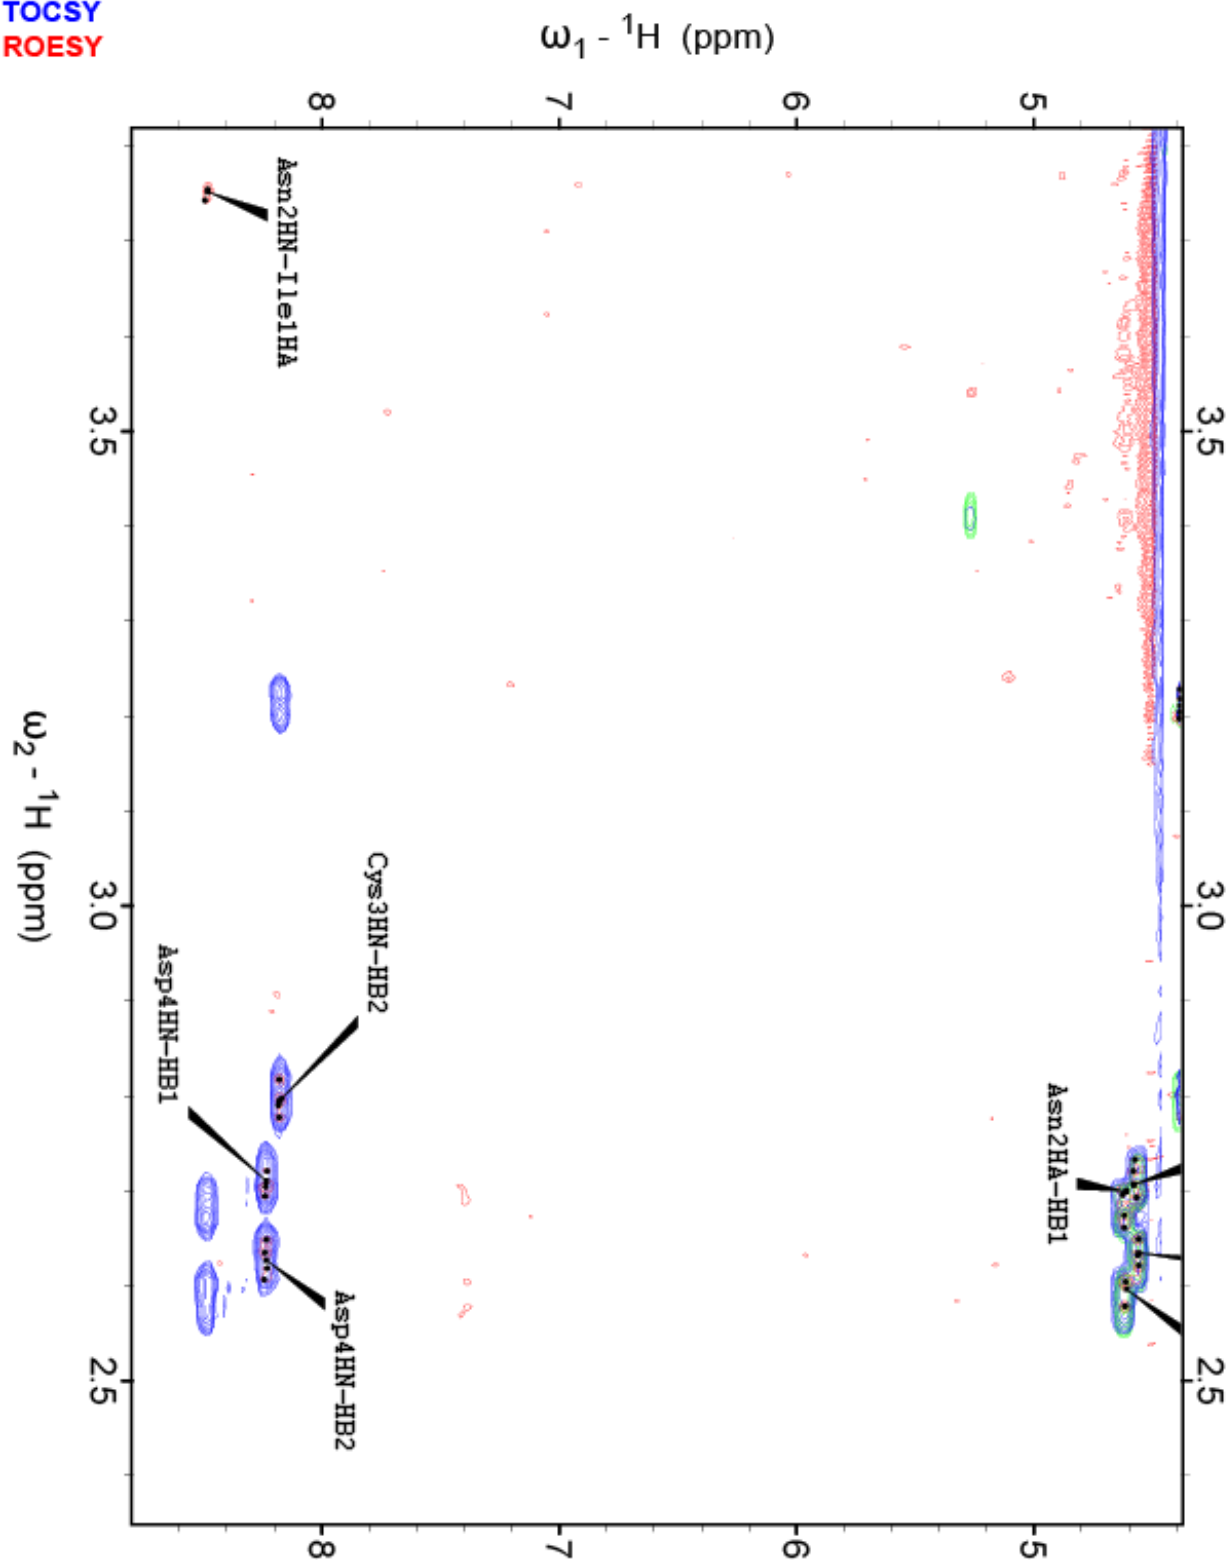

AIP-III F5A aliphatic region 1

COSY  
TOCSY  
ROESY

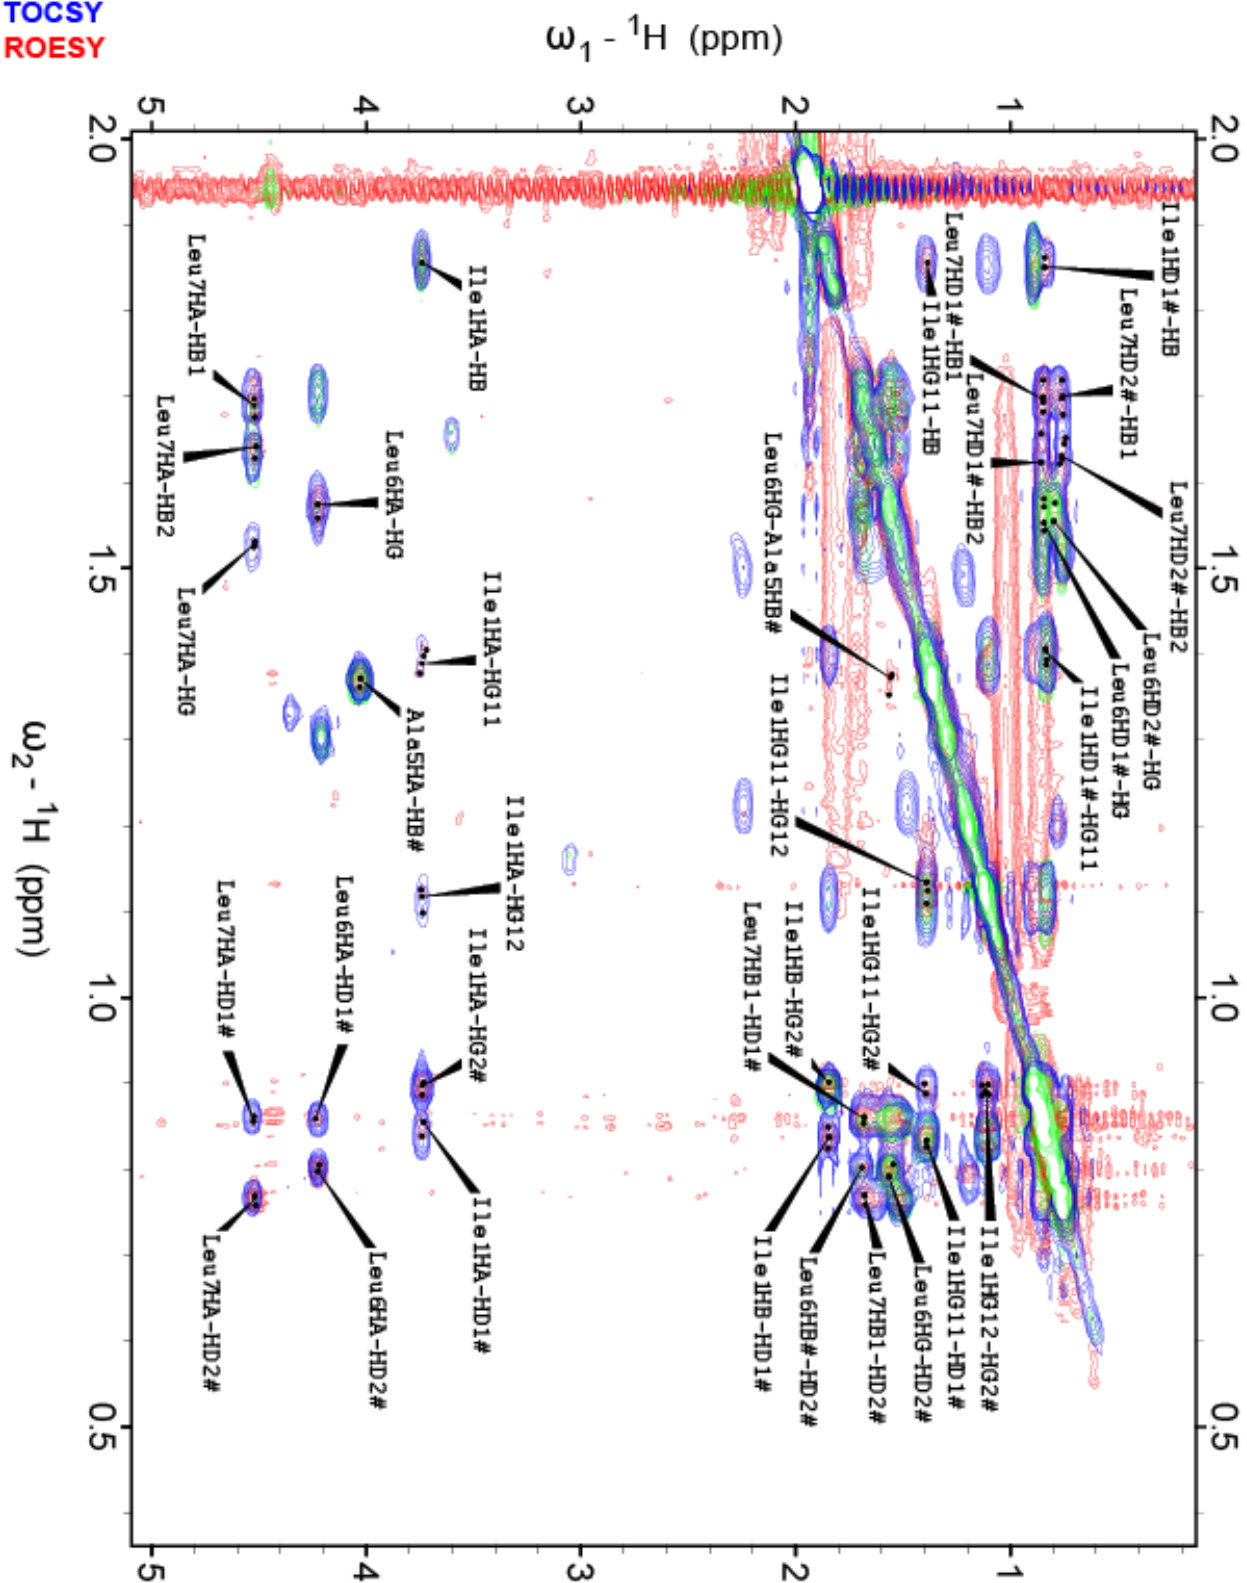

AIP-III F5A aliphatic region 2

COSY  
TOCSY  
ROESY

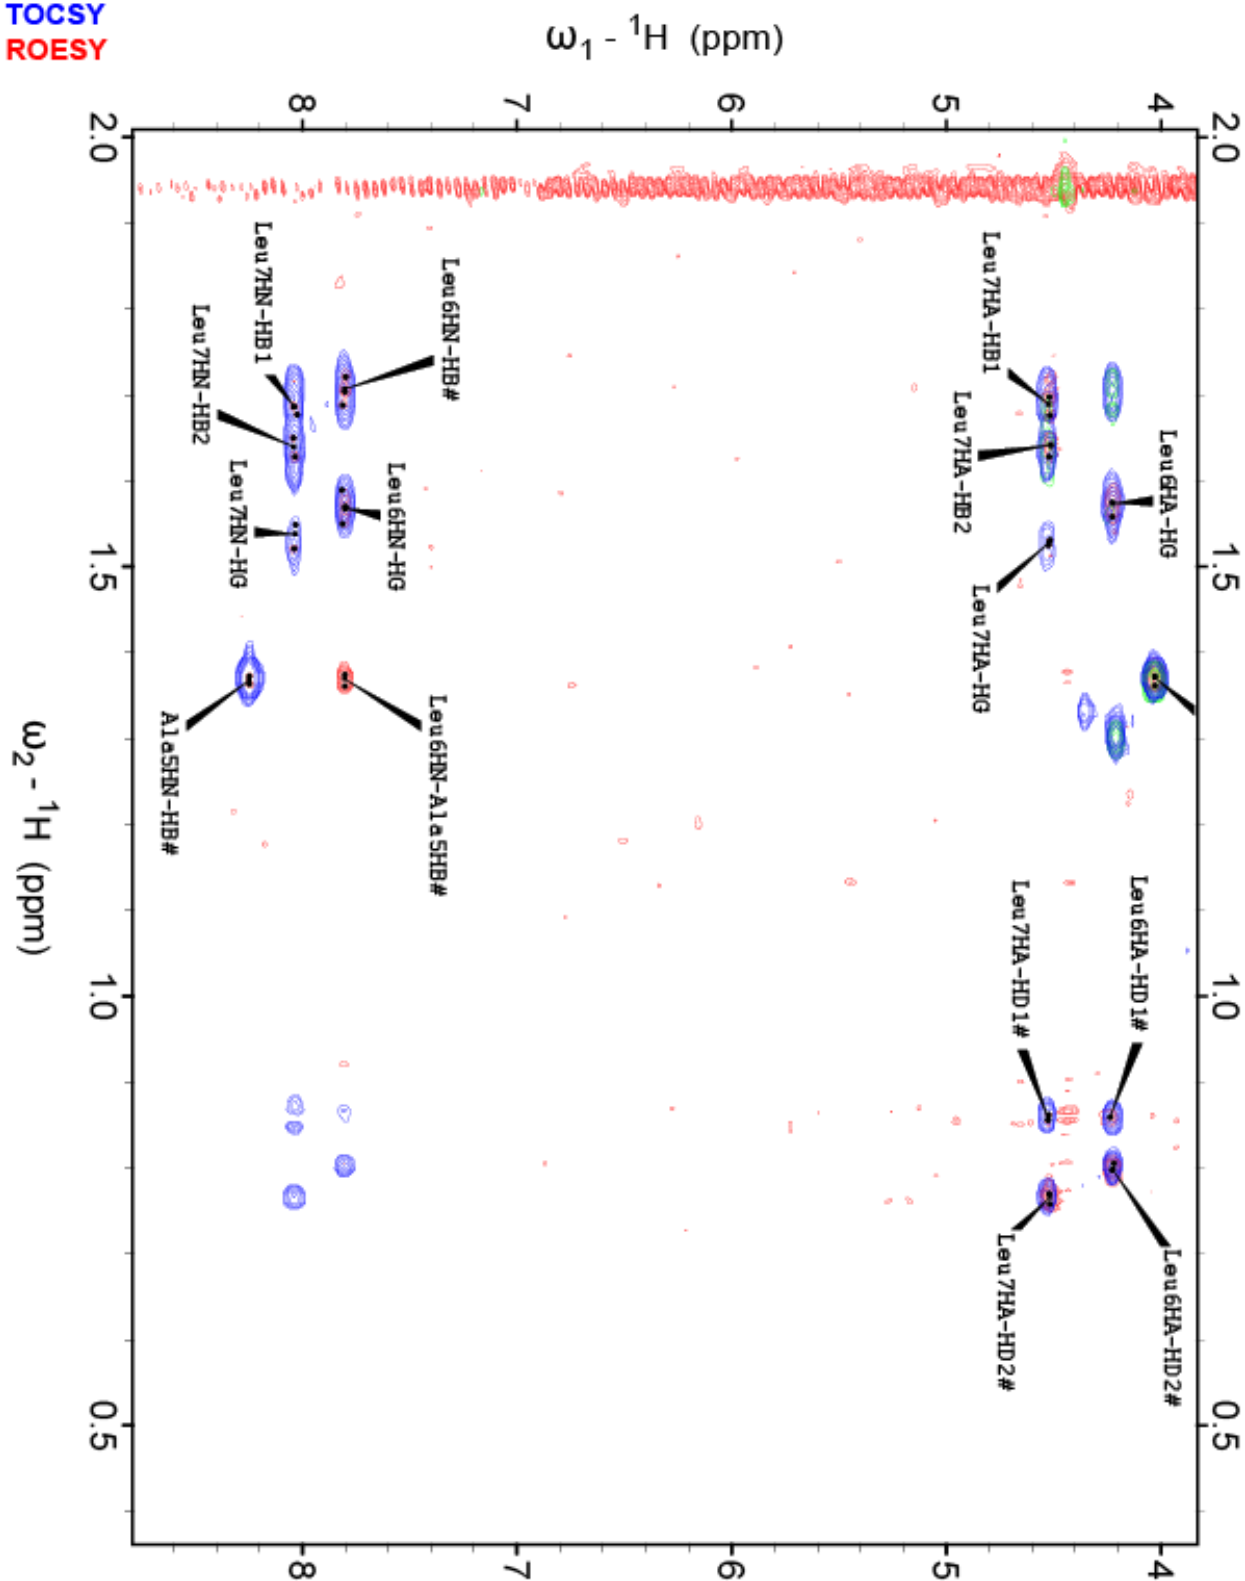

**AIP-III L7A**  
1-D spectrum

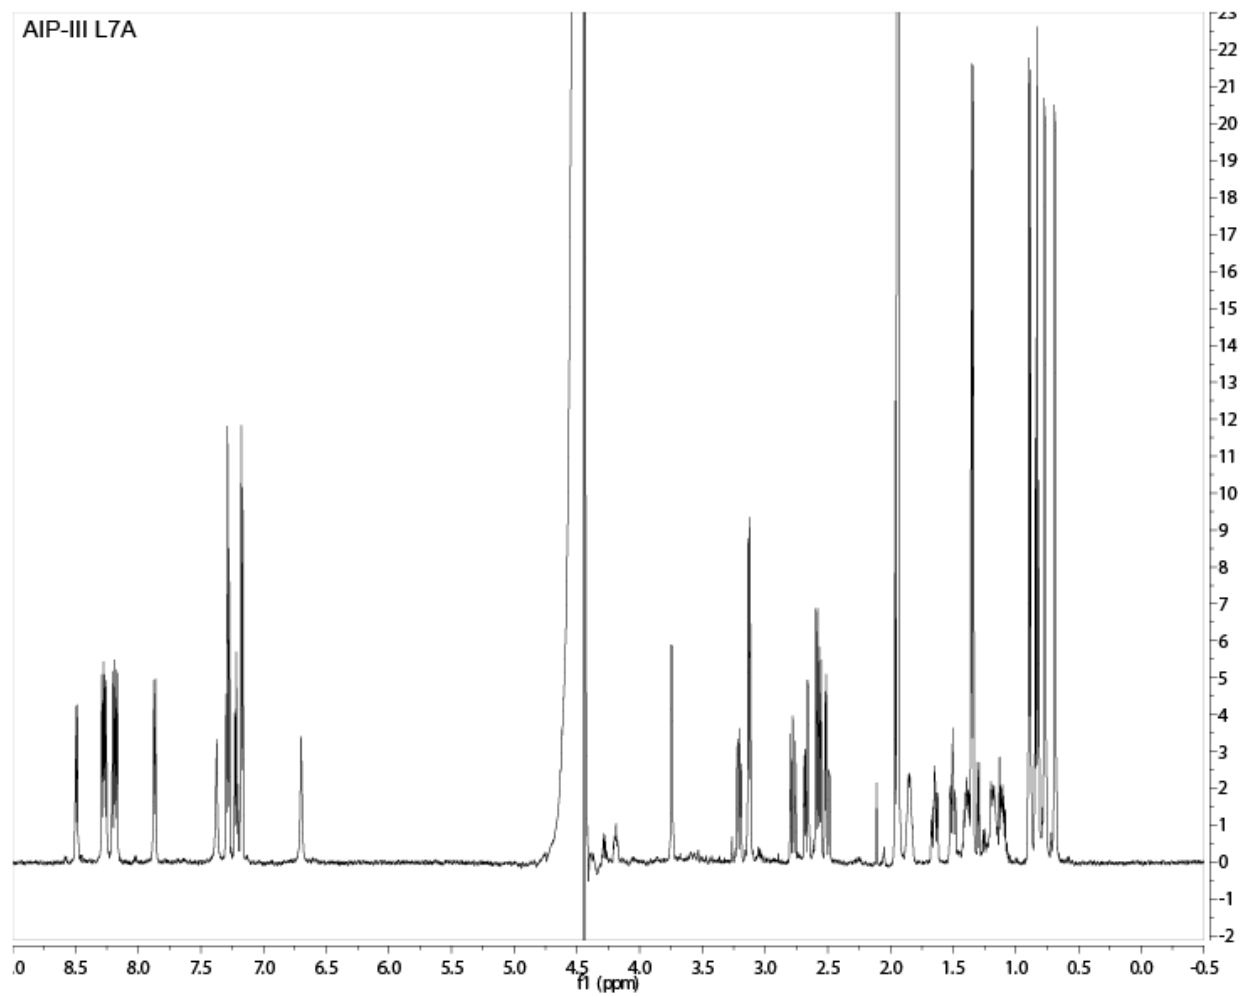





AIP-III L7A C-alpha region 1

COSY  
TOCSY  
ROESY

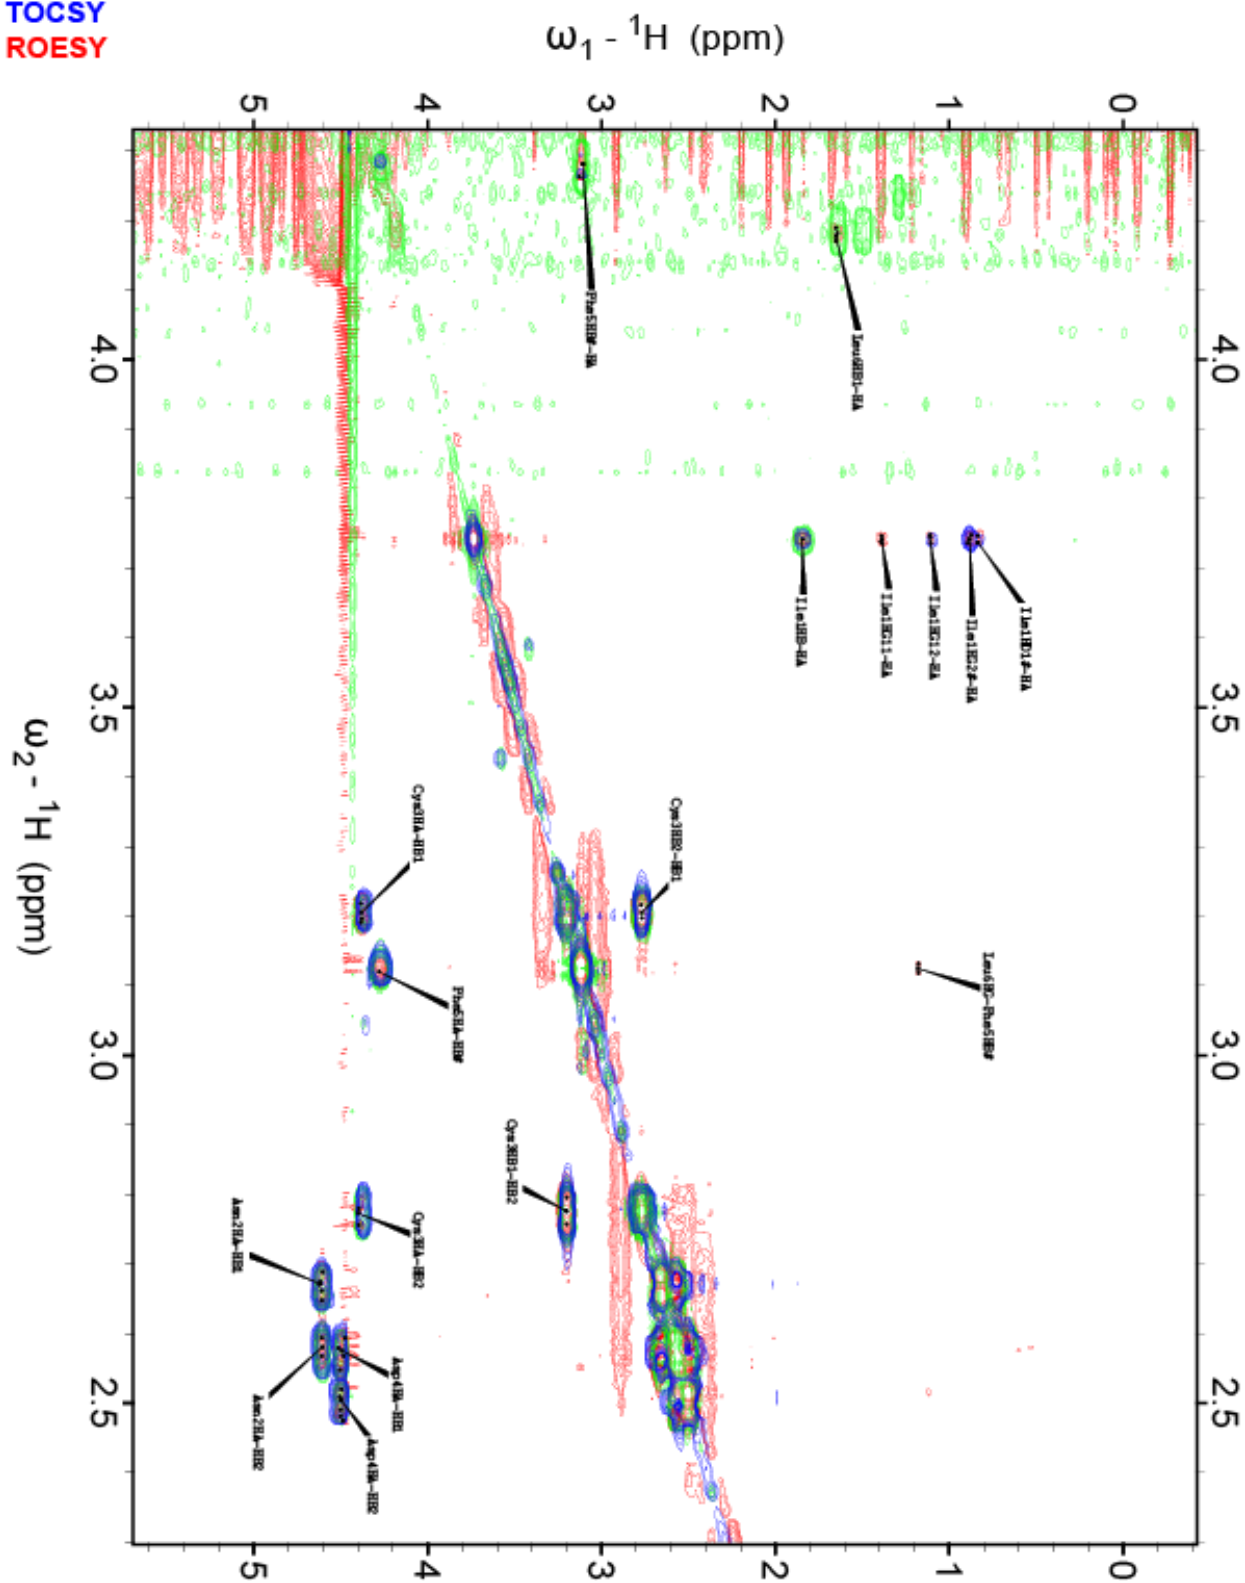









**AIP-I**  
1-D spectrum

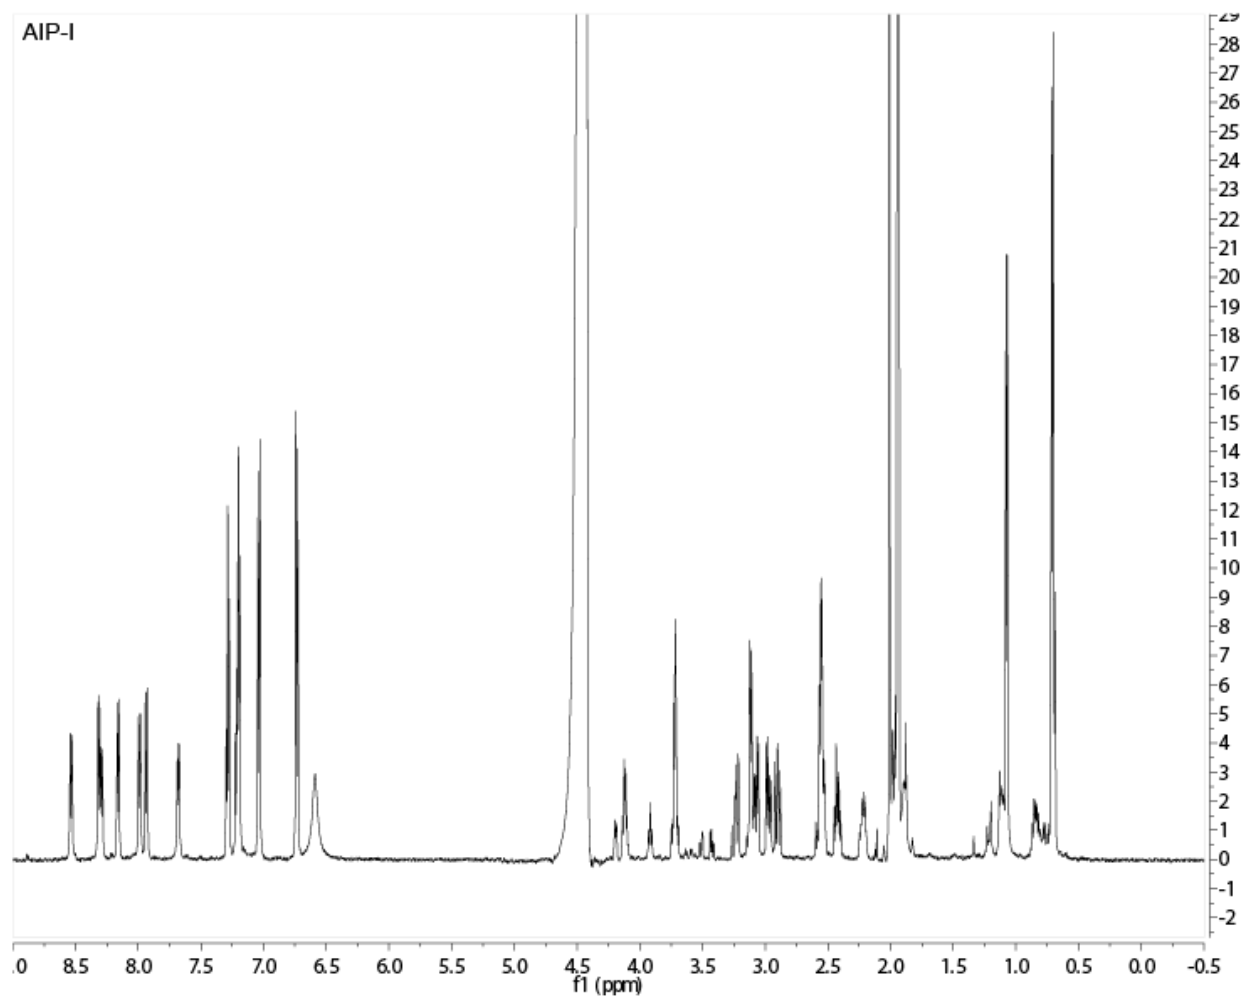















**AIP-II**  
1-D spectrum

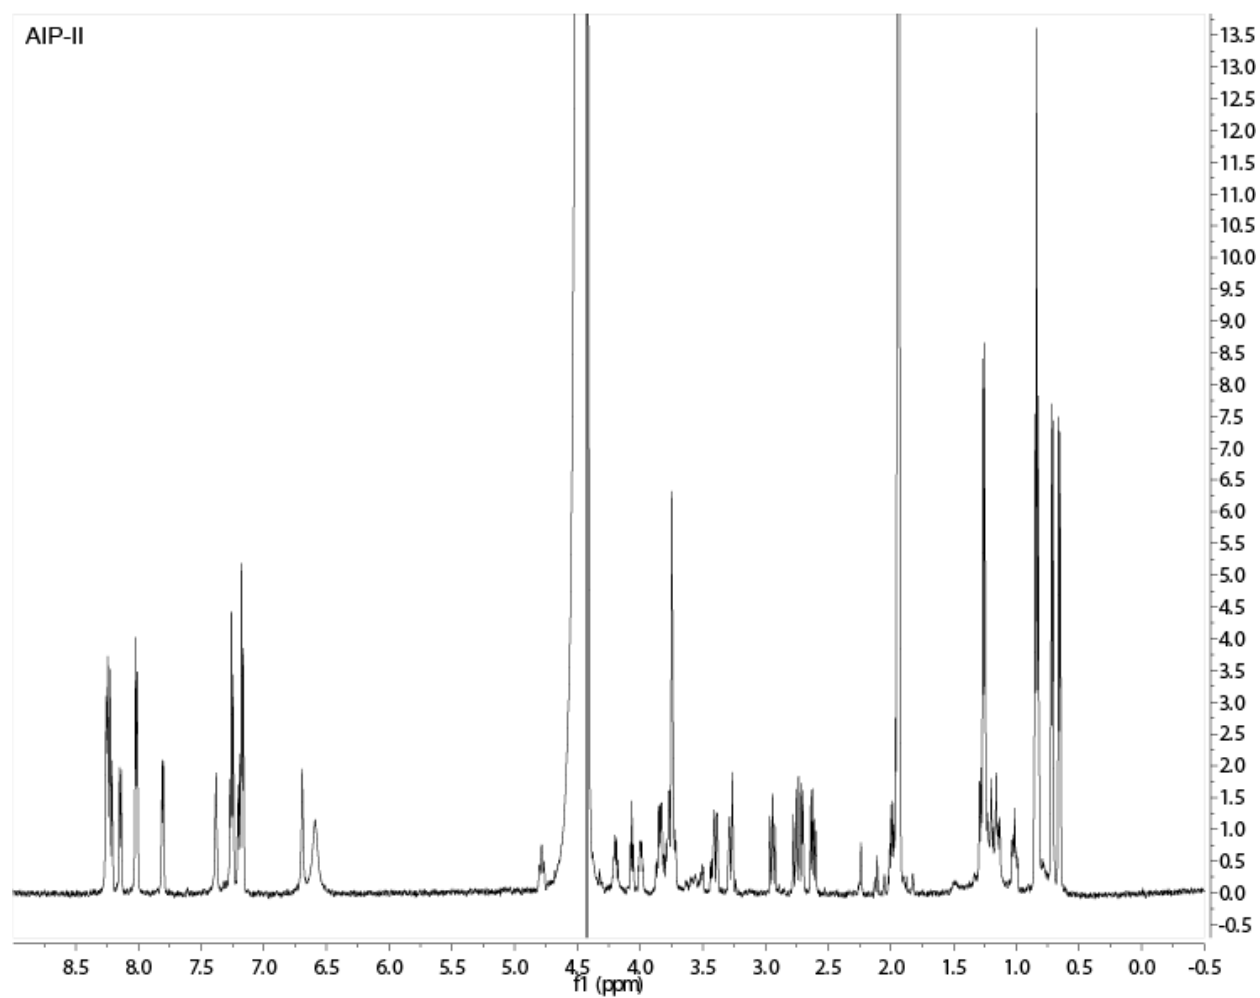



AIP-II fingerprint region 2

COSY  
TOCSY  
ROESY

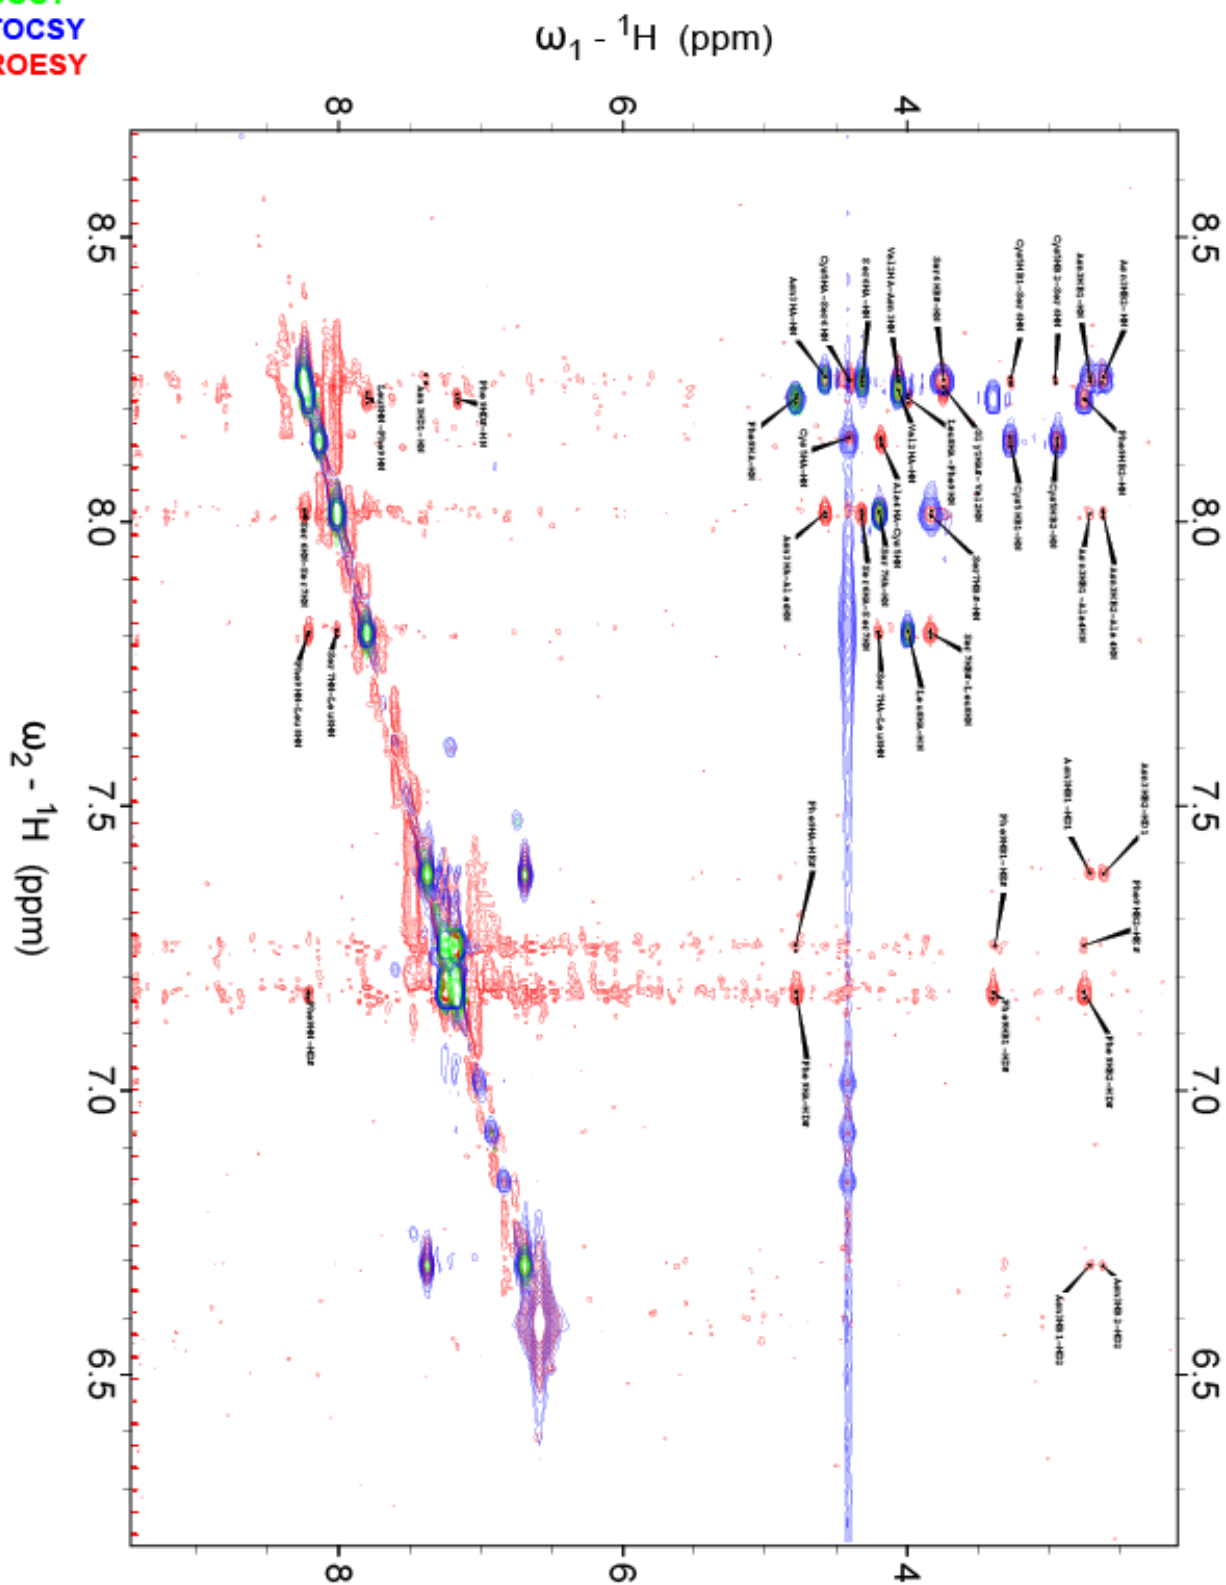

AIP-II C-alpha region 1

COSY  
TOCSY  
ROESY

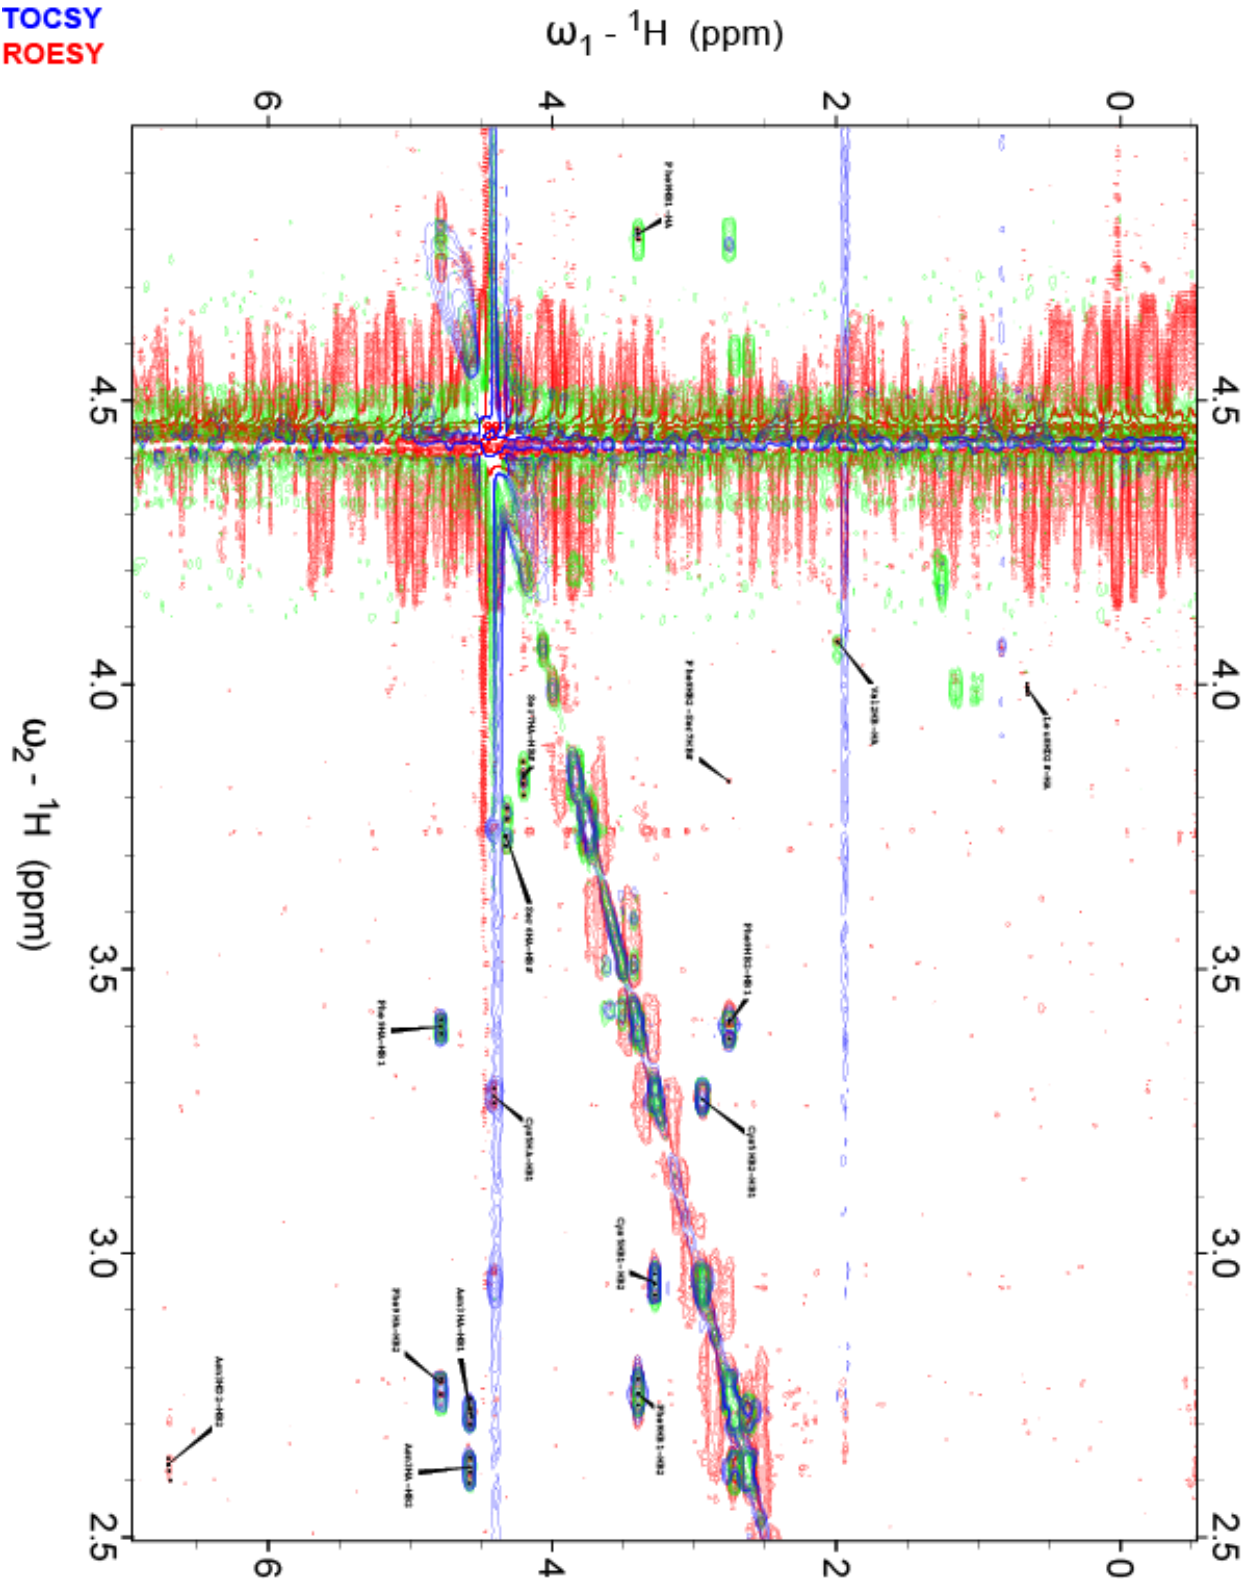



AIP-II aliphatic region 1

COSY  
TOCSY  
ROESY

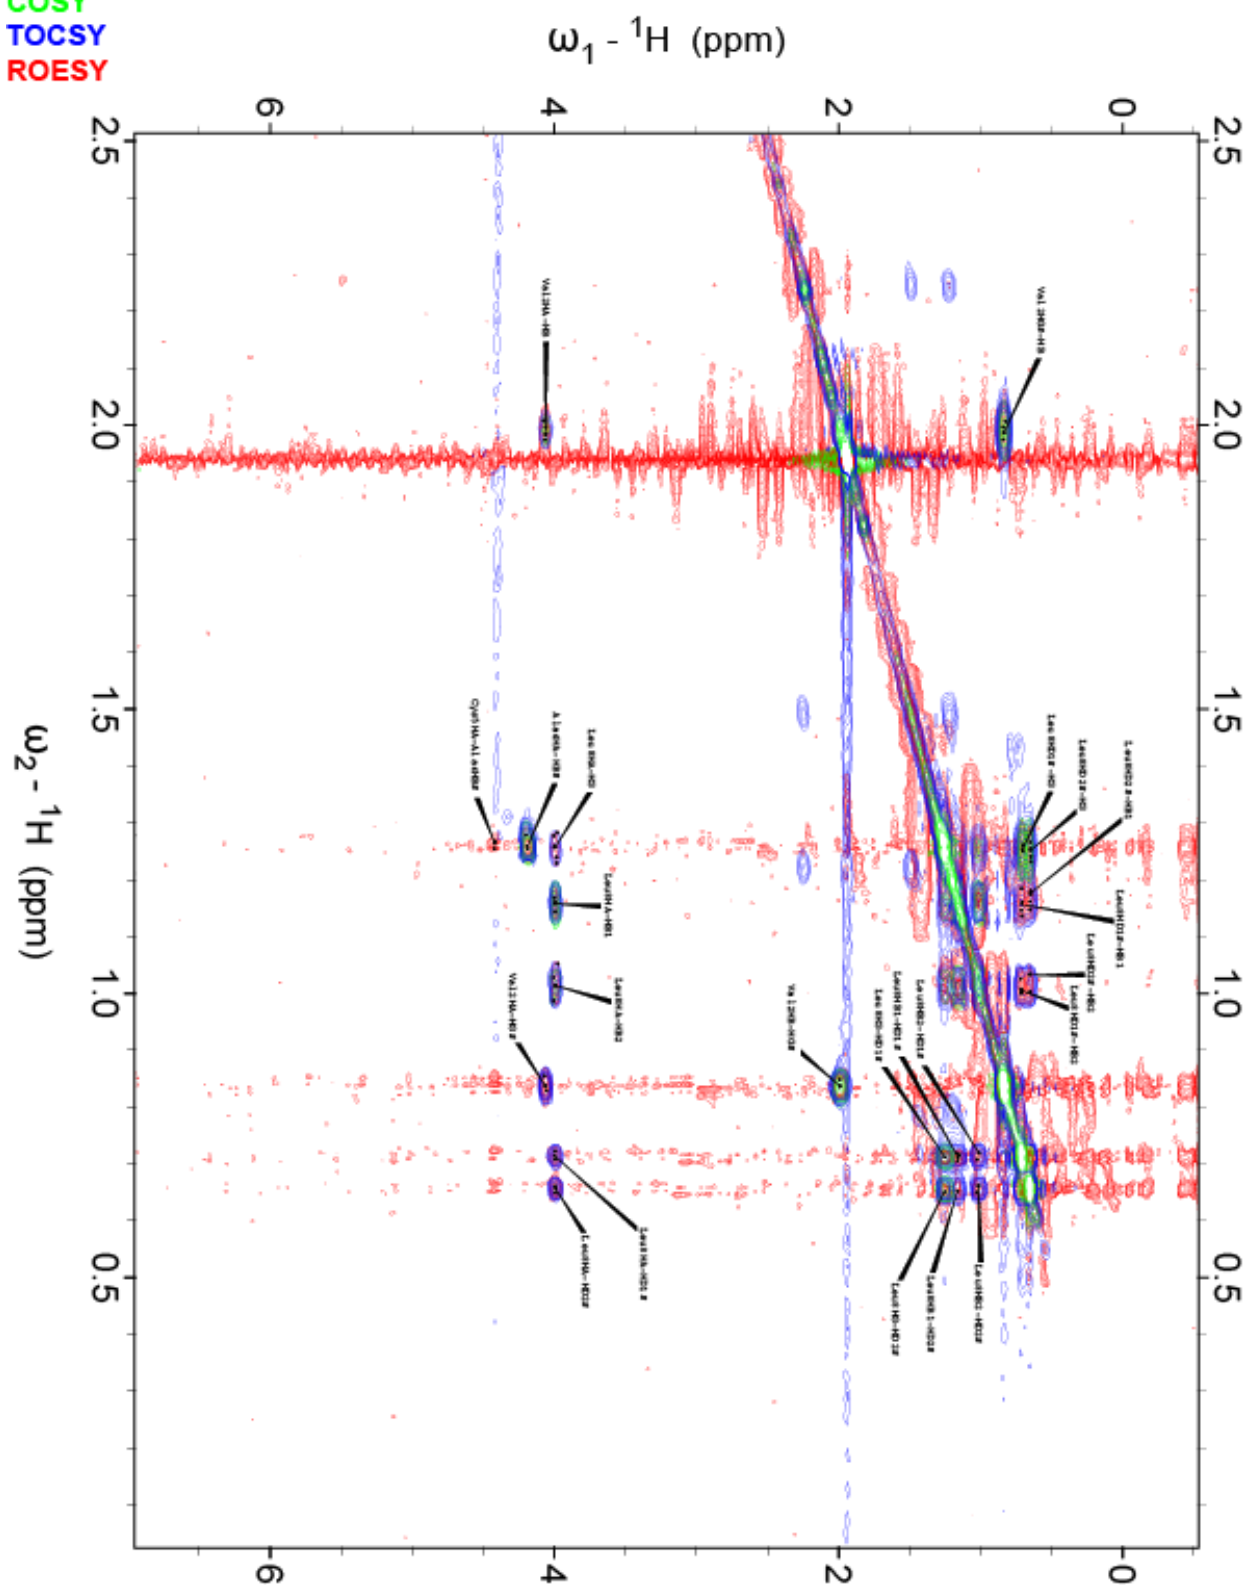





**AIP-IV**  
1-D spectrum

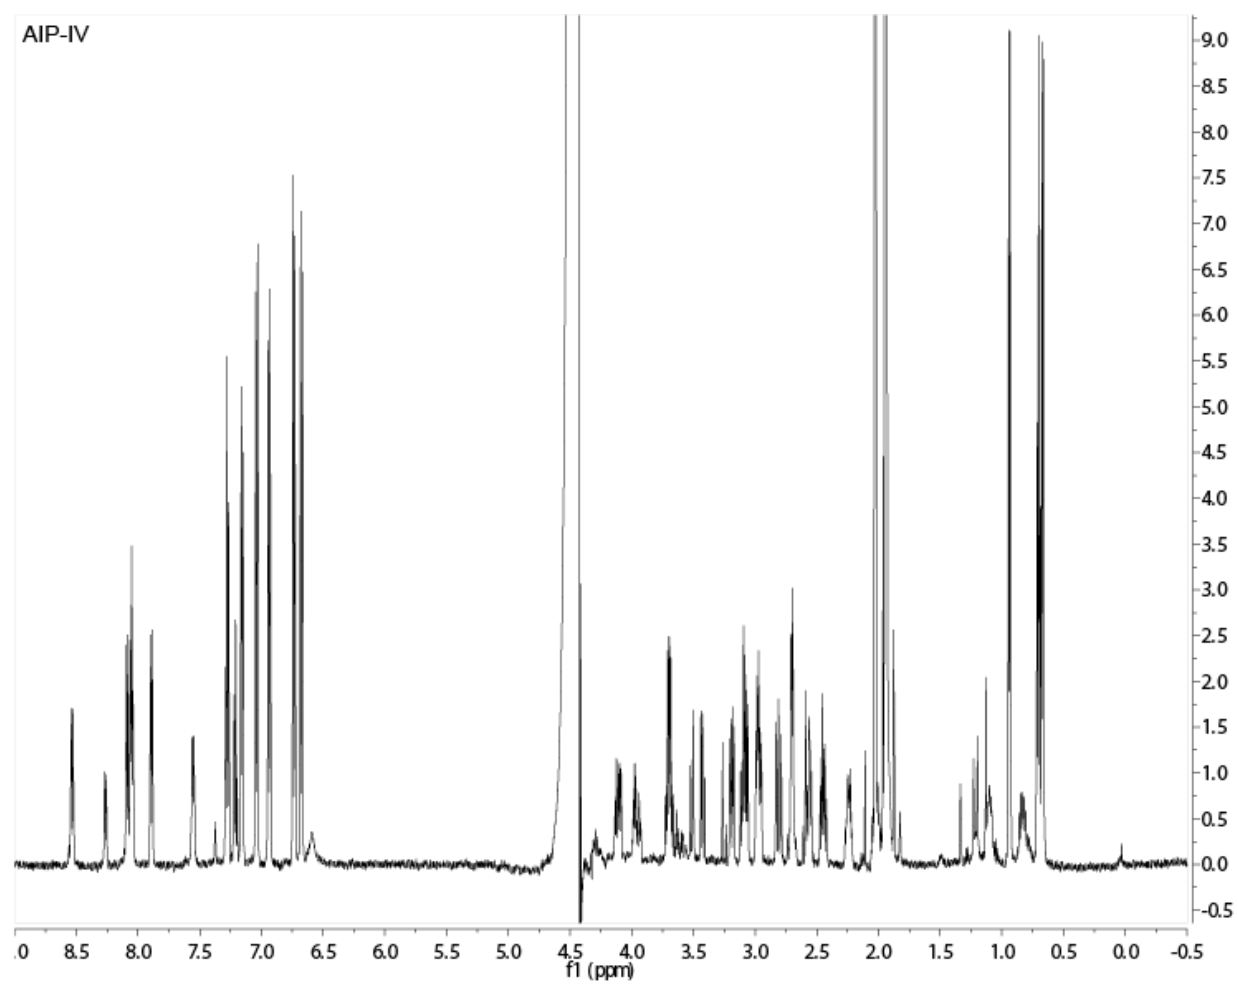

AIP-IV fingerprint region 1

COSY  
TOCSY  
ROESY

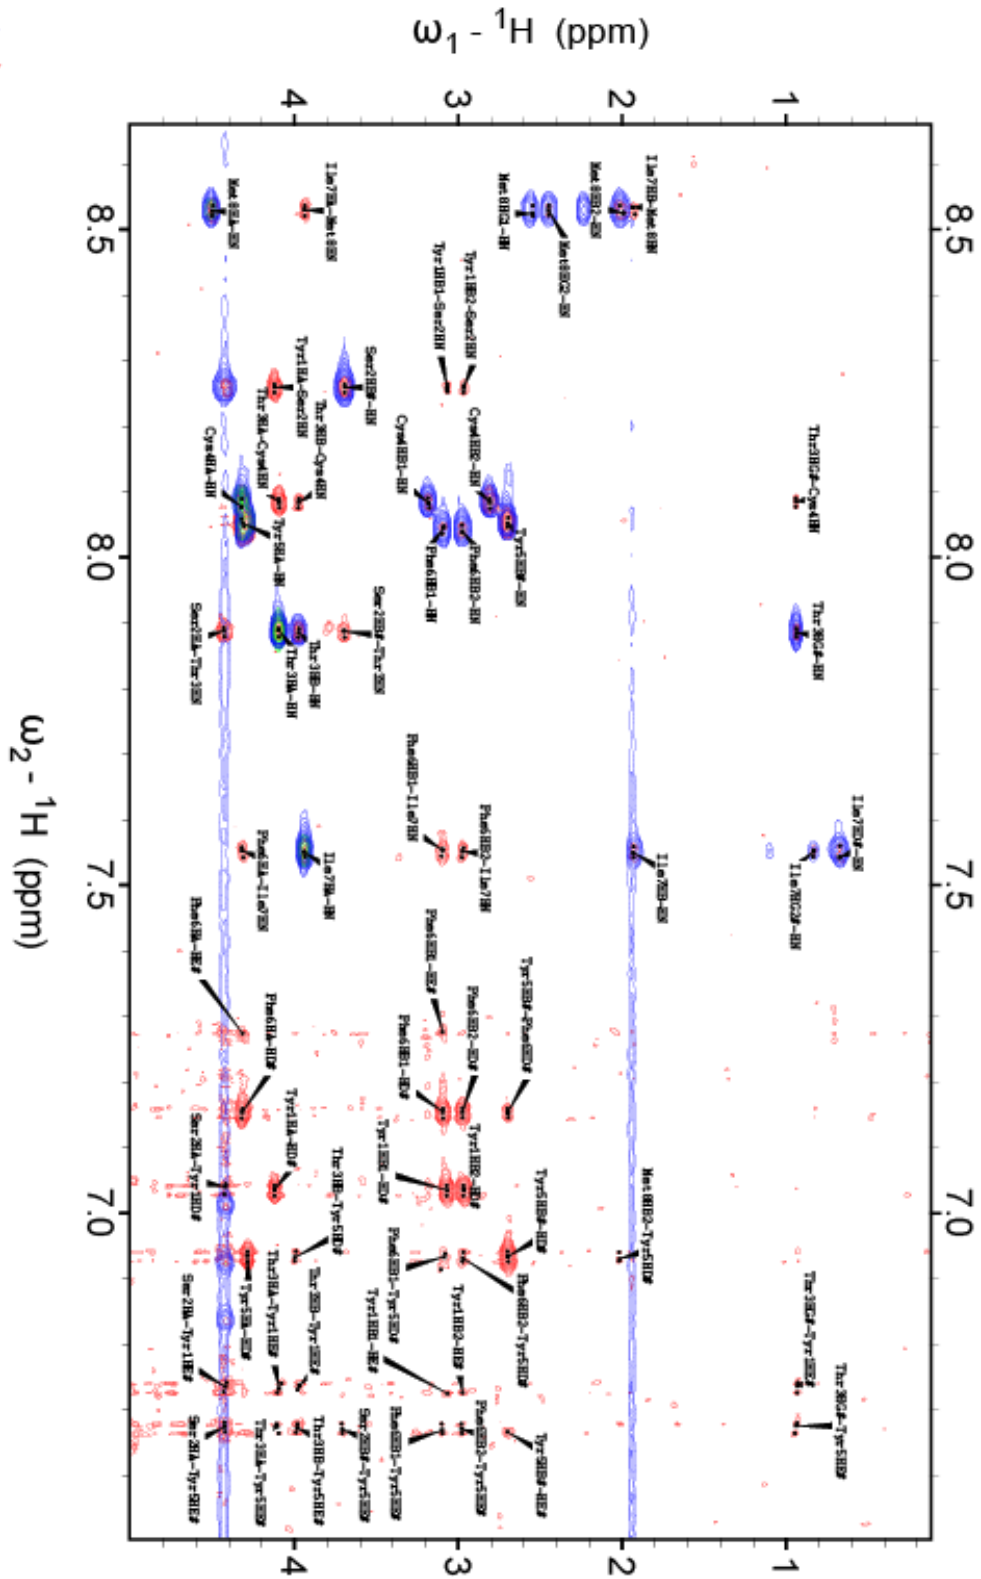

AIP-IV fingerprint region 2

COSY  
TOCSY  
ROESY

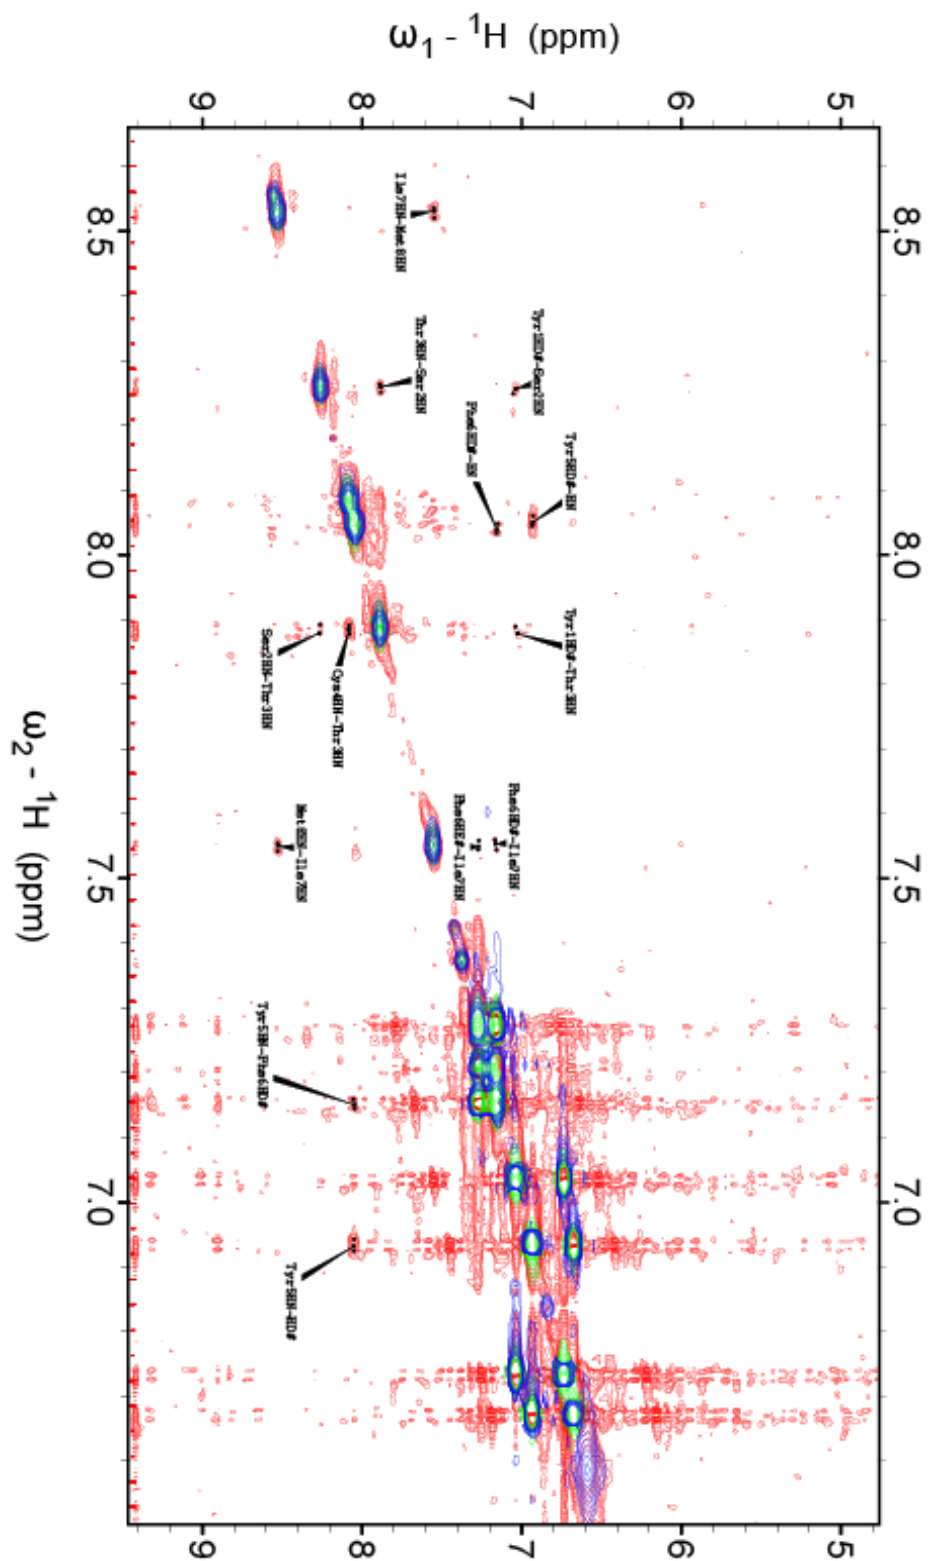



AIP-IV C-alpha region 2

COSY  
TOCSY  
ROESY

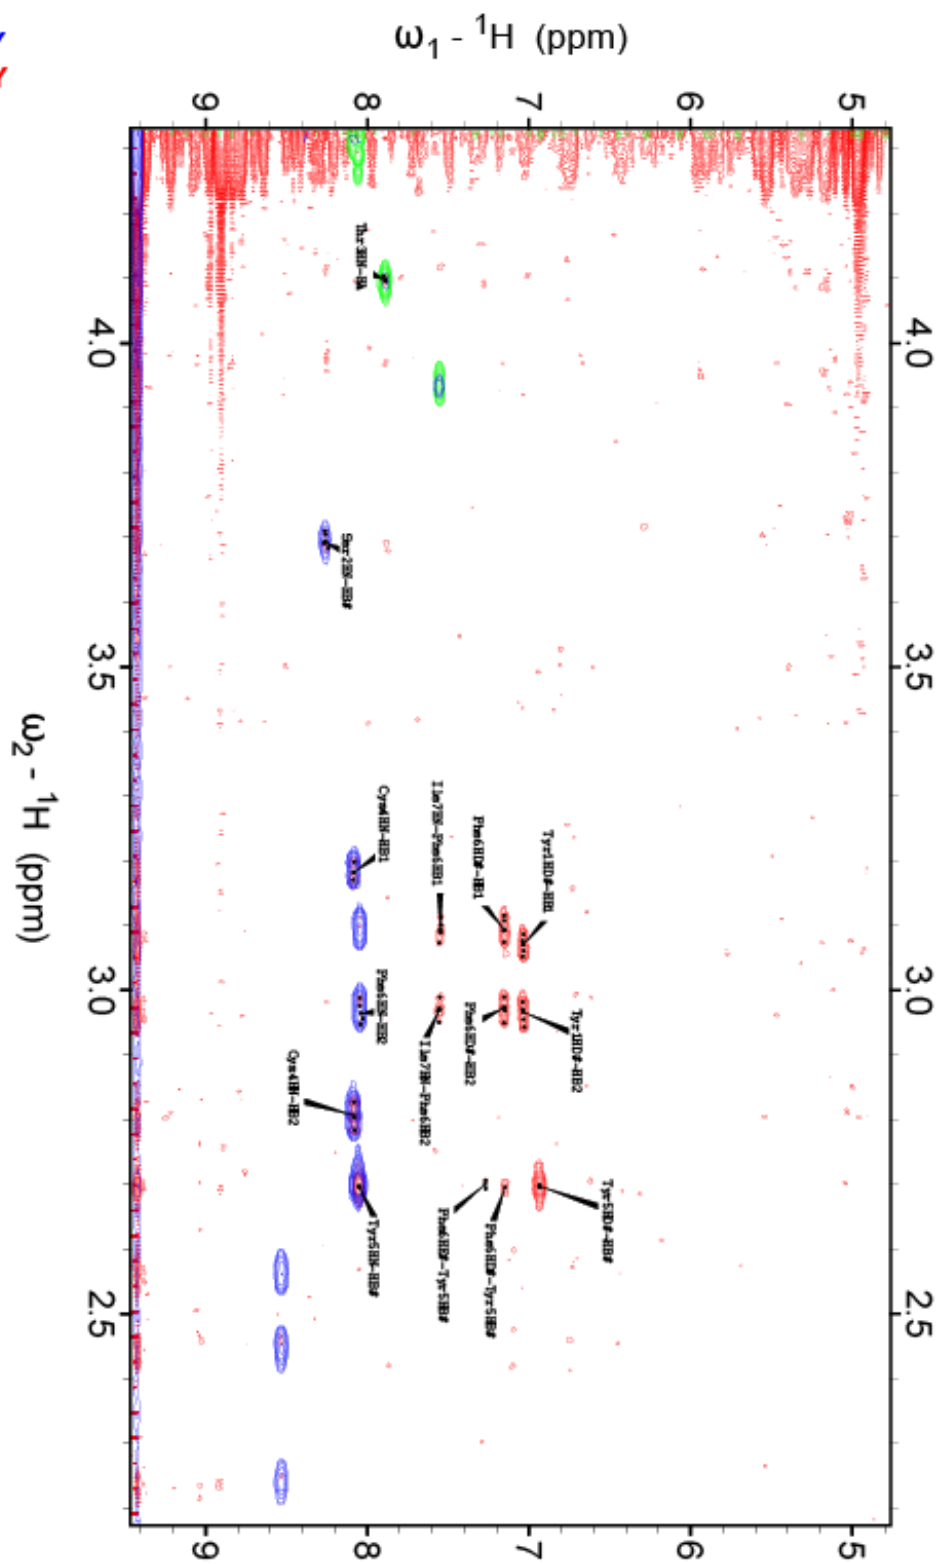



AIP-IV aliphatic region 2

COSY  
TOCSY  
ROESY

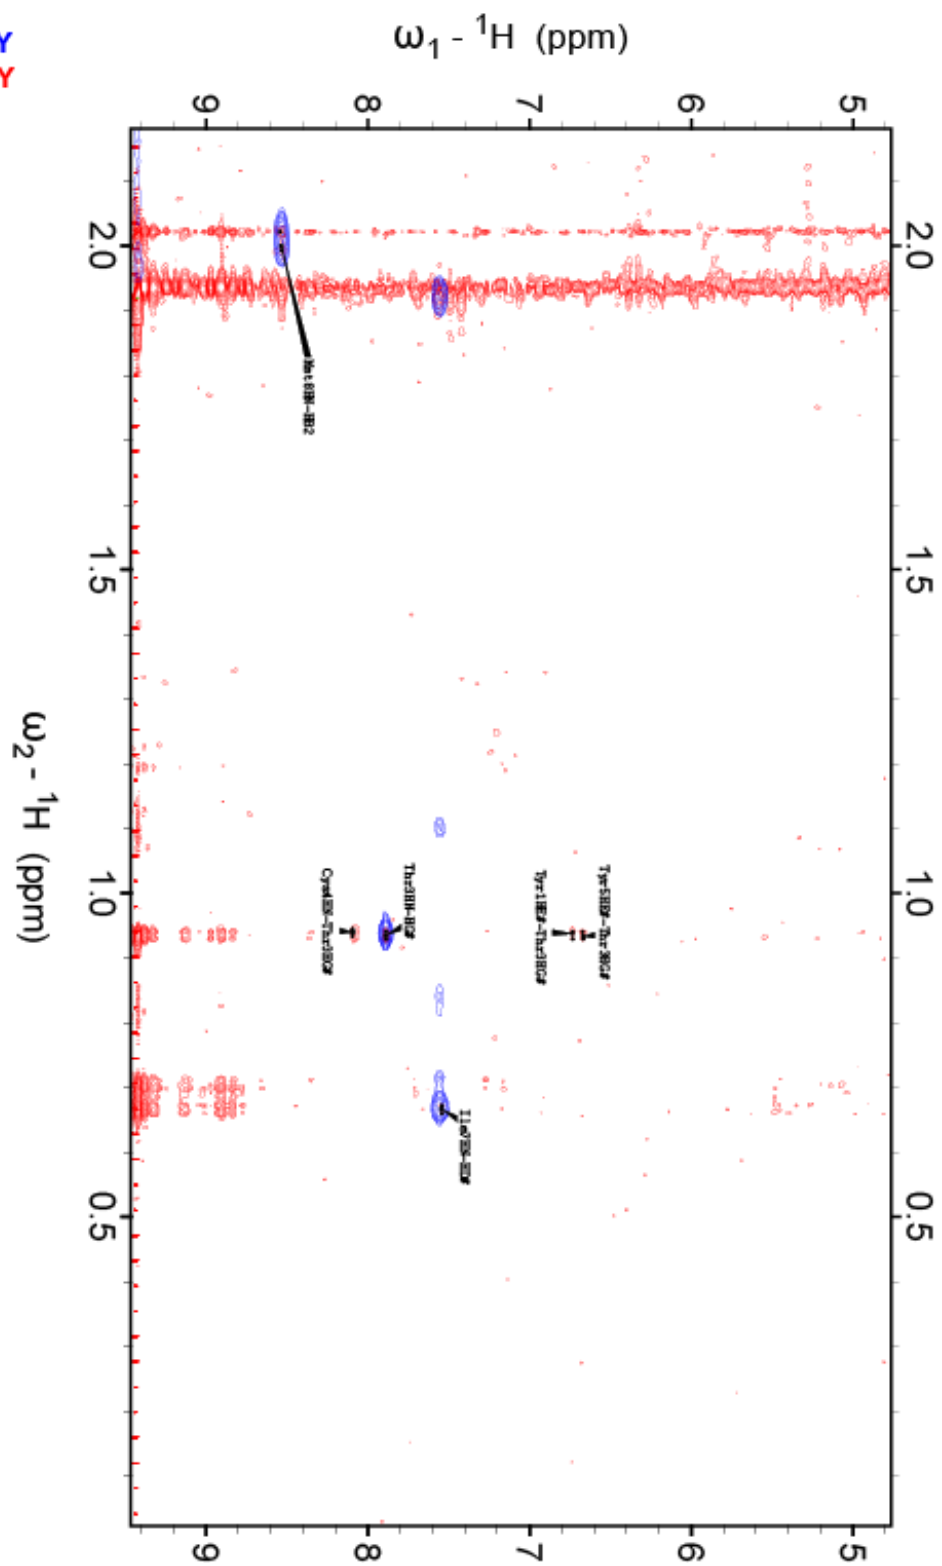



**References.**

- (1) Tal-Gan, Y.; Stacy, D. M.; Foegen, M. K.; Koenig, D. W.; Blackwell, H. E. *J. Am. Chem. Soc.* **2013**, *135*, 7869–7882.
- (2) Ji, G.; Beavis, R. C.; Novick, R. P. *Proc. Natl. Acad. Sci. U. S. A.* **1995**, *92*, 12055-12059.
- (3) Lyon, G. J.; Wright, J. S.; Muir, T. W.; Novick, R. P. *Biochemistry* **2002**, *41*, 10095-10104.
- (4) Kirchdoerfer, R. N.; Garner, A. L.; Flack, C. E.; Mee, J. M.; Horswill, A. R.; Janda, K. D.; Kaufmann, G. F.; Wilson, I. A. *J. Biol. Chem.* **2011**, *286*, 17351-17358.
